# Reduced transfer coefficient of carbon monoxide in pulmonary arterial hypertension implicates rare protein-truncating variants in *KDR*

## Genotype-phenotype inference reveals novel PAH risk genes

Emilia M. Swietlik, MD<sup>[1]</sup>, Daniel Greene, PhD<sup>[2,3]</sup>, Na Zhu, PhD<sup>[4,5]</sup>, Karyn Megy, PhD<sup>[2,3]</sup>, Marcella Cogliano, MSc<sup>[6]</sup>, Smitha Rajaram, MD<sup>[7]</sup>, Divya Pandya, MSc<sup>[1]</sup>, Tobias Tilly, MSc<sup>[1]</sup>, Katie A. Lutz, BS<sup>[8]</sup>, Carrie C. L. Welch, PhD<sup>[4]</sup>, Michael W. Pauciulo, BS, MBA<sup>[8,9]</sup>, Laura Southgate, PhD<sup>[10]</sup>, Jennifer M. Martin, MSt<sup>[3]</sup>, Carmen M. Treacy, BSc<sup>[1]</sup>, Harm J. Bogaard, MD, PhD<sup>[11]</sup>, Colin Church, PhD<sup>[12]</sup>, Gerry Coghlan, MD<sup>[13]</sup>, Anna W. Coleman, MS<sup>[8]</sup>, Robin Condliffe, MD<sup>[14]</sup>, Mélanie Eyries, PhD<sup>[15]</sup>, Henning Gall, MD, PhD<sup>[16]</sup>, Stefano Ghio, MD<sup>[17]</sup>, Barbara Girerd, PhD<sup>[18]</sup>, Simon Holden, PhD<sup>[19]</sup>, Luke Howard, MD, PhD<sup>[20]</sup>, Marc Humbert, MD, PhD<sup>[18]</sup>, David G. Kiely, MD<sup>[14]</sup>, Gabor Kovacs, MD<sup>[21,22]</sup>, Jim Lordan, PhD<sup>[23]</sup>, Rajiv D. Machado, PhD<sup>[10]</sup>, Robert V. MacKenzie Ross, MB, BChir<sup>[24]</sup>, Shahin Moledina, MBChB<sup>[25]</sup>, David Montani, MD, PhD<sup>[18]</sup>, Horst Olschewski, MD<sup>[21,22]</sup>, Joanna Pepke-Zaba, PhD<sup>[26]</sup>, Christopher J. Rhodes, PhD<sup>[20]</sup>, Werner Seeger, MD<sup>[16]</sup>, Florent Soubrier, MD, PhD<sup>[15]</sup>, Jay Suntharalingam, MD<sup>[24]</sup>, Mark R. Toshner, MD<sup>[1,26]</sup>, Anton Vonk Noordegraaf, MD<sup>[11]</sup>, John Wharton, PhD<sup>[20]</sup>, Jim Wild, PhD<sup>[6]</sup>, Stephen John Wort, PhD<sup>[20,27]</sup>, NIHR BioResource for Translational Research - Rare Diseases<sup>[28]</sup>, National Cohort Study of Idiopathic and Heritable PAH<sup>[29]</sup>, PAH Biobank Enrolling Centers' Investigators<sup>[30]</sup>, Allan Lawrie, PhD<sup>[6]</sup>, Martin R. Wilkins, MD<sup>[20]</sup>, Richard C. Trembath, FRCP<sup>[31]</sup>, Yufeng Shen, PhD<sup>[5,32]</sup>, Wendy K. Chung, MD<sup>[33]</sup>, Andrew J. Swift, PhD<sup>[6]</sup>, William C. Nichols, PhD<sup>[8,9]</sup>, Nicholas W. Morrell, MD<sup>[1,3,19,26,\$]</sup>, Stefan Gräf, PhD<sup>[1,2,3,\$]</sup>

§ these authors jointly supervised this work

### Affiliations

<sup>[1]</sup>Department of Medicine, University of Cambridge, Cambridge Biomedical Campus, Cambridge, United Kingdom.

<sup>[2]</sup>Department of Haematology, University of Cambridge, Cambridge Biomedical Campus, Cambridge, United Kingdom.

<sup>[3]</sup>NIHR BioResource for Translational Research, Cambridge Biomedical Campus, Cambridge, United Kingdom.

<sup>[4]</sup>Department of Pediatrics, Columbia University, New York, United States.

<sup>[5]</sup>Department of Systems Biology, Columbia University, New York, United States.

<sup>[6]</sup>Department of Infection, Immunity and Cardiovascular Disease, University of Sheffield, Sheffield, United Kingdom.

<sup>[7]</sup>Sheffield Teaching Hospitals NHS Foundation Trust, Sheffield, United Kingdom.

<sup>[8]</sup>Division of Human Genetics, Cincinnati Children's Hospital Medical Center, Cincinnati, United States.

<sup>[9]</sup>Department of Pediatrics, University of Cincinnati College of Medicine, Cincinnati, United States.

<sup>[10]</sup>Molecular and Clinical Sciences Research Institute, St George's, University of London, London, United Kingdom.

<sup>[11]</sup>Department of Clinical Genetics, Amsterdam UMC, Vrije Universiteit Amsterdam, Amsterdam, The Netherlands, Amsterdam, The Netherlands.

<sup>[12]</sup>Golden Jubilee National Hospital, Glasgow, United Kingdom.

<sup>[13]</sup>Royal Free Hospital, London, United Kingdom.

<sup>[14]</sup>Sheffield Pulmonary Vascular Disease Unit, Royal Hallamshire Hospital, Sheffield, United Kingdom.

<sup>[15]</sup>Département de génétique, hôpital Pitié-Salpêtrière, Assistance Publique-Hôpitaux de Paris, and UMR\_S 1166-ICAN, INSERM, UPMC Sorbonne Universités, Paris, France.

<sup>[16]</sup>University of Giessen and Marburg Lung Center (UGMLC), member of the German Center for Lung Research (DZL) and of the Excellence Cluster Cardio-Pulmonary Institute (CPI), Giessen, Germany.

<sup>[17]</sup>Fondazione IRCCS Policlinico San Matteo, Pavia, Italy.

<sup>[18]</sup>Université Paris-Sud, Faculté de Médecine, Université Paris-Saclay; AP-HP, Service de Pneumologie, Centre de référence de l'hypertension pulmonaire; INSERM UMR\_S 999, Hôpital Bicêtre, Le Kremlin-Bicêtre, Paris, France.

<sup>[19]</sup>Addenbrooke's Hospital NHS Foundation Trust, Cambridge Biomedical Campus, Cambridge, United Kingdom.

<sup>[20]</sup>National Heart & Lung Institute, Imperial College London, London, United Kingdom.

<sup>[21]</sup>Ludwig Boltzmann Institute for Lung Vascular Research, Graz, Austria.

<sup>[22]</sup>Medical University of Graz, Graz, Austria.

<sup>[23]</sup>Freeman Hospital, Newcastle upon Tyne, United Kingdom.

<sup>[24]</sup>Royal United Hospitals Bath NHS Foundation Trust, Bath, United Kingdom.

<sup>[25]</sup>Great Ormond Street Hospital, London, United Kingdom.

<sup>[26]</sup>Royal Papworth Hospital NHS Foundation Trust, Cambridge Biomedical Campus, Cambridge, United Kingdom.

<sup>[27]</sup>Royal Brompton & Harefield NHS Foundation Trust, London, United Kingdom.

<sup>[28]</sup>University of Cambridge and Cambridge University Hospitals NHS Foundation Trust, Cambridge Biomedical Campus, Cambridge, United Kingdom.

<sup>[29]</sup>[www.ipahcohort.com](http://www.ipahcohort.com), Cambridge, United Kingdom.

<sup>[30]</sup>[www.pahbiobank.org](http://www.pahbiobank.org), Cincinnati, United States.

<sup>[31]</sup>Department of Medical and Molecular Genetics, King's College London, London, United Kingdom.

<sup>[32]</sup>Department of Biomedical Informatics, Columbia University, New York, United States.

<sup>[33]</sup>Columbia University Medical Center, New York, United States.

Corresponding authors:

Dr Stefan Gräf, PhD & Professor Nicholas W. Morrell, M.D.

Department of Medicine, University of Cambridge, Level 5, Cambridge University Hospitals, Box 157, Cambridge Biomedical Campus, Cambridge, CB2 0QQ, United Kingdom

Email: [sg550@cam.ac.uk](mailto:sg550@cam.ac.uk) / [nwm23@cam.ac.uk](mailto:nwm23@cam.ac.uk), tel: (+44) 1223 588036 / (+44) 1223 331666

Total word count: 4422

# Abstract

## Background

To date, approximately 25% of patients with pulmonary arterial hypertension (PAH) have been found to harbour rare mutations in disease-causing genes. Given the small number of patients affected by mutations in most PAH genes, the identification of the missing heritability in PAH is challenging. We hypothesised that integrating deep phenotyping data with whole-genome sequencing data will reveal additional disease variants that are extremely rare and/or have a unique phenotypic signature.

## Methods

We analysed whole-genome sequencing data from 13,037 participants enrolled in the NIHR BioResource - Rare Diseases (NIHRBR-RD) study, of which 1148 were recruited to the PAH domain. To test for genetic associations between genes and selected phenotypes of pulmonary hypertension (PH), we used the Bayesian rare-variant association method BeviMed. We defined the groups for comparison by assigning labels ('tags') inferred from the current diagnostic classification of PAH, stratification by age at diagnosis and transfer coefficient of carbon monoxide (KCO).

## Results

Protein truncating variants (PTV) in *KDR* were strongly associated with the lower KCO tertile (posterior probability (PP)=0.989) and the higher age tertile (PP=0.912) groups. On computed tomographic imaging of the lungs, a range of parenchymal abnormalities were observed in the

patients harbouring PTV in *KDR*. KCO stratification also highlighted an association between Isocitrate Dehydrogenase (NAD(+)) 3 Non-Catalytic Subunit Gamma (*IDH3G*) and moderately reduced KCO in patients with pulmonary hypertension (PP=0.920). The US PAH Biobank was used to independently validate these findings and identified four additional PAH cases with PTV in *KDR* and two in *IDH3G*. We confirmed associations between previously established genes and PAH.

## Conclusions

PTVs in *KDR*, the gene encoding vascular endothelial growth factor receptor 2 (VEGFR2), are significantly associated with two specific phenotypes of PAH, reduced KCO and later age of onset, highlighting a role for VEGF signalling in the pathogenesis of human PAH. We also report *IDH3G* as a new PAH risk gene. Moreover, we demonstrate that the use of deep clinical phenotyping data advances the identification of novel causative rare variants.

# Introduction

Pulmonary arterial hypertension is a rare condition characterised by pulmonary vascular narrowing and obliteration, causing elevation of pulmonary vascular resistance and ultimately, right ventricular failure. Multiple concepts have been proposed to explain the mechanisms leading to pulmonary vessel remodelling<sup>1</sup>. More recently, hallmarks of cancer, such as aberrant angiogenesis<sup>2</sup>, metabolic reprogramming<sup>3</sup> and resistance to apoptosis<sup>4</sup>, have been proposed. A breakthrough in our understanding of PAH pathobiology was the discovery of heterozygous germline mutations in the gene encoding bone morphogenetic protein type 2 receptor (*BMPR2*)<sup>5,6</sup>. It is now established that *BMPR2* mutations are responsible for over 70% of familial cases of PAH (HPAH) and 15-20% of idiopathic cases of PAH (IPAH). The penetrance of *BMPR2* mutations is incomplete, so not all carriers develop the disease<sup>7</sup>. A smaller proportion (up to 10%) of PAH is caused by mutations in activin-like kinase 1 (*ACVRL1*)<sup>8</sup>, endoglin (*ENG*)<sup>9</sup>, SMAD family member 9 (*SMAD9*)<sup>10</sup>, caveolin-1 (*CAV1*), involved in colocalization of BMP receptors<sup>11</sup>, and the potassium channel, *KCNK3*, responsible for membrane potential and vascular tone<sup>12</sup>. Using burden tests, we have recently identified rare pathogenic variants in growth differentiation factor 2 (*GDF2*), which encodes BMP9, a major ligand for *BMPR2*, as well as rare variants in ATPase 13A3 (*ATP13A3*), aquaporin 1 (*AQP1*) and SRY-box 17 (*SOX17*), and reported a list of additional putative genes potentially contributing to the pathobiology of PAH<sup>13</sup>. Together, these established genes explain approximately 25% of cases with idiopathic/hereditary pulmonary arterial hypertension (I/HPAH). To identify additional genes harbouring potentially causal rare variants in PAH cases, we increased the cohort size and deployed a Bayesian framework incorporating refined phenotype data.

## Methods

### Study design, ethics, and subject recruitment

The National Institute for Health Research BioResource - Rare Diseases study (NIHRBR-RD), the Rare Disease pilot for Genomics England Ltd. 100,000 Genomes Project, was established to identify genetic causes, improve rates of molecular diagnosis and develop new treatments for rare diseases through whole-genome sequencing and deep phenotyping<sup>14</sup>. Of the 18 domains, 15 were defined either as a single rare disease or a group of rare disorders ([Table S1](#)). The PAH domain comprised 1148 subjects including individuals diagnosed with either idiopathic or heritable PAH, pulmonary veno-occlusive disease (PVOD) or pulmonary capillary haemangiomas (PCH) and a small number of healthy relatives. Adult and paediatric onset cases were eligible, as well as incident and prevalent cases. Recruitment was carried out across the nine PAH specialist centres in the UK and retrospectively by international collaborators at the Université Paris-Saclay and Sorbonne Université (France), University of Giessen and Marburg (Germany), and hospitals in Graz (Austria), Pavia (Italy) and Amsterdam (The Netherlands). Patients recruited to the NIHRBR-RD study provided written, informed consent for genetic analysis and clinical data capture (REC REF: 13/EE/0325); patients recruited by European collaborators consented to genetic testing and clinical data collection locally.

Patients with rare diseases recruited to domains other than PAH were used as non-PAH controls in the genetic analysis ([Table 1](#)).

For validation, we used the US PAH Biobank cohort comprising exome sequencing data from 2572 subjects diagnosed with group 1 PAH<sup>15</sup> and a biobank of 440 PAH patients established at Columbia University Medical Center composed of 29 FPAH, 195 IPAH and 216 APAH individuals<sup>16</sup>.

## Phenotyping of patients

### Clinical phenotyping and case-control cohort using phenotypic ‘tags’

Pseudonymised results of routinely performed clinical tests were stored across twenty-one electronic Clinical Case Report Forms (eCRFs) in the *OpenClinica* data capture system ([Table S2](#)). All cases were diagnosed between January 2002 to December 2017, and the diagnostic classification was made according to international guidelines using a multidisciplinary assessment that included echocardiography, comprehensive blood testing, pulmonary function testing, overnight oximetry, isotope perfusion scanning, high-resolution computed tomography, and right heart catheterisation. To aid data analysis and improve data quality, a number of quality assurance procedures were introduced ([see Supplemental Material](#)). Diagnosis in all patients was verified based on haemodynamic criteria, reported comorbidities (history of pulmonary embolism, chronic obstructive pulmonary disease, interstitial lung disease (ILD), left heart disease, connective tissue disease, structural heart abnormalities, anorexigen use) and results of pulmonary function tests, heart and lung imaging and clinical blood tests (autoantibody screen). Cases in which the diagnosis was questionable were reported back to recruiting centres for verification. Appropriate diagnostic and phenotypic tags were assigned to all recruited patients to be used in the subsequent case-control analysis ([Figure S1](#)). The full set of tags, with corresponding numbers of cases, controls and excluded relatives, can be found in [Table 1](#).

### Analysis of computerised tomography scans

Diagnostic chest computerised tomography (CT) scans were performed and reported in 613 study participants. The analysis of these scans was done in PAH centres and subsequently transcribed to study eCRFs. Of 613 scans, 294 were available for repeated analysis. The scans



were anonymised and transferred to Department of Infection, Immunity and Cardiovascular Disease, University of Sheffield, Sheffield, UK where they were reviewed by two independent cardiothoracic radiologists with expertise in pulmonary hypertension (AS and SR), who were blinded to the underlying diagnosis, mutation and smoking status. For consistency and reproducibility, all measurements were reported on a customised proforma ([Table S3](#)).

CT scans were obtained between 2002 and 2018 (n=269), CT pulmonary angiogram (CTPA, n=241), high resolution computed tomography (HRCT no CTPA, n=28). Slice thickness was less than 5mm for all studies, typically  $\leq 1$ mm. Images were analysed on open source software Horos (Annapolis, MD USA). Cardiac and vascular measurements were taken by one observer (MC) and reviewed by the Consultant Radiologist (AS). Thoracic Radiological features were scored semi-quantitatively by two independent Cardiothoracic Radiologist observers each with 9 years experience in pulmonary hypertension imaging (AS, SR) with a very good interobserver agreement ([see Supplement, Table S10](#))

## Whole-genome sequencing, short read alignment and variant calling

Samples were received as either DNA extracted from whole blood or as whole blood EDTA samples that were extracted at central DNA extraction and QC laboratory in Cambridge (UK). They were subsequently tested for adequate DNA concentration, DNA degradation and purity. Next-generation paired-end whole-genome sequencing, using three read lengths 100bp (377 samples), 125bp (3,154 samples) and 150bp (9,656 samples), was performed on cases and controls using Illumina HiSeq2500 and HiSeq X (Illumina Inc, San Diego, USA).

Reads were aligned against the Genome Reference Consortium human genome build 37 (GRCh37, [https://www.ncbi.nlm.nih.gov/assembly/GCF\\_000001405.13/](https://www.ncbi.nlm.nih.gov/assembly/GCF_000001405.13/)) using the Illumina

Isaac Aligner version SAAC00776.15.01.27<sup>17</sup> and variants were called using the Illumina Starling software version 2.1.4.2 ([https://support.illumina.com/help/BS\\_App\\_TS\\_Amplicon\\_OLH\\_15055858/Content/Source/Informatics/Apps/IsaacVariantCaller\\_appENR.htm](https://support.illumina.com/help/BS_App_TS_Amplicon_OLH_15055858/Content/Source/Informatics/Apps/IsaacVariantCaller_appENR.htm)). The variants were then left-aligned, normalized with *bcftools* and loaded into our Hbase database to produce multi-sample variant calls to undertake the genetic association studies<sup>14</sup>.

## Genetic association between rare variants and selected diagnostic and phenotypic tags

Schematic analysis pipeline is depicted in [Figure 1A](#). We hypothesised that groups of patients who share a particular feature may also share a similar genetic aetiology and used the current diagnostic classification of pulmonary hypertension and stratification by age at diagnosis and KCO (% predicted), to define a set of phenotypic tags ([Table 1](#)). We defined cases as individuals carrying a particular tag whereas the individuals from the non-PAH domains served as controls ([Figure 1](#), [Table S1](#)). Variants were extracted from each gene as previously described<sup>14</sup> including a  $PMAF_x$  (for a given variant, the probability that the minor allele count is at least the observed minor allele count, given that  $MAF=1/X$ )  $<0.05$  with  $x=1,000$  for the recessive and  $x=10,000$  for the dominant association model, and a CADD Phred score  $\geq 10$ . The analysis was restricted to the Ensembl annotated canonical transcript. Bayesian model comparison method called BeviMed<sup>18</sup> was applied to the extracted rare variants from a set of unrelated individuals to test posterior probability of gene-tag associations under dominant and recessive modes of inheritance. Patients with rare deleterious variants in previously established PAH disease genes (*BMPR2*, *ACVRL1*, *ENG*, *CAV1*, *SMAD1*, *SMAD4*, *SMAD9*, *KCNK3*, *EIF2AK4*, *TBX4*, *AQP1*,

*ATP13A3*, *GDF2*, *SOX17*) that were deemed disease-causing by a genetic multidisciplinary team according to the ACMG Standards and Guidelines<sup>19</sup>, were excluded from the association testing for other genes to minimise false-positive associations. To increase power in scenarios where only variants of particular consequence types were associated with the disease risk, association models were fitted to different subsets of variants according to the consequences provided by Ensembl ([https://www.ensembl.org/info/genome/variation/prediction/predicted\\_data.html](https://www.ensembl.org/info/genome/variation/prediction/predicted_data.html)): the High category, comprised only variants of “high” impact, including PTVs and large deletions; the Moderate category contains variants of impact “moderate”, including missense variants or consequence “non\_coding\_transcript\_exon\_variant”; the combined category Moderate and High, combining the respective consequence types. The prior probability of association across all association models was set to 0.001. Our choice of prior was informed by the estimation that approximately 30 genes might be involved in the pathogenesis of pulmonary arterial hypertension out of the 32,606 protein-coding and non-coding genes (defined by the selected gene biotypes provided by Ensembl, [see supplemental material](#)) tested after applying the filtering described above.

## Descriptive statistics

Statistical analysis and data visualisation were performed in R ([www.r-project.org](http://www.r-project.org)). Summary statistics are shown as mean ( $\pm$ SD) or median [IQR] according to data distribution (normality testing was performed with the Shapiro-Wilk test and QQ plots). The number of available data points is reported in tables. Comparisons between the categorical variables were performed using Fisher’s exact and Chi-square test, comparisons between continuous non-normally distributed variables were performed with the Mann-Whitney’ test (for two groups) or the Kruskal-Wallis test (three and more groups). Adjustment for multiple comparisons was performed when

appropriate. The Kaplan-Meier method was used to visualise survival curves; the log-rank test was used to compare survival between two or more groups; Cox proportional hazards regression was used to examine the effect of variables on survival. Testing for the proportional hazards assumption, influential observations and non-linearity were done, and the assumptions were met. To measure the magnitude of agreement between CT scan readers, 22 randomly selected tests were assessed by both radiologists. For categorical variables, the weighted (ordinal data) and unweighted (for non-ordinal data) Cohen's Kappa for two readers were calculated and for continuous variables, the intraclass correlation coefficient (ICC) was computed with the R package ("irr").

## Results

### Characterization of study cohorts and tag definition

Whole-genome sequencing was performed in 13,037 participants of the NIHRBR-RD study, of which 1148 were recruited to the PAH domain. The PAH domain included 23 unaffected parents and 3 cases with an unknown phenotype, which were subsequently removed from the analysis ([Table S1](#), [Figure 1B](#)). Of the remaining 1122 participants, 972 (86.6%) had a clinical diagnosis of IPAH, 73 (6.5%) of HPAH, and 20 (1.8%) were diagnosed with PVOD/PCH. Verification of diagnosis based on the collected clinical information revealed that 57 participants (5%) had a diagnosis other than IPAH, HPAH or PVOD/PCH. These cases were subsequently relabelled and moved to the respective tag group for analysis (see [Table S4](#), [Table 1](#)). The population structure of the PAH cohort was comparable to previously studied European PAH populations, with a median age at diagnosis of 49[35;63] years, and female predominance of 68% (760 individuals). Among the most common comorbidities were hypertension (24%), diabetes mellitus type 2

(12%) and hypothyroidism (12%). Most patients were treated with combination therapies (44%) followed by monotherapy with sildenafil (24%) ([Table S4](#)). Overall survival in the studied population was 97% at 1-year, 91% at 3-years and 84% at 5-years. When the cohort was divided into prevalent and incident cases 1-, 3-, and 5-year survival was 98%, 93%, 87% and 97%, 84%, 72% respectively.

Transfer coefficient of carbon monoxide (KCO) measured at diagnosis was available for 644 patients (57%) ([see Supplemental Material, Table S5, Figure S1](#)). Median KCO in the entire studied population was 71[52;86]% predicted ([Figure S2](#)). Cases in the lower tertile or below the KCO threshold of 50% predicted were more commonly male, older at diagnosis, had a current or past history of cigarette smoking and an increased number of cardiorespiratory comorbidities ([Table S6, Table S7](#)). Survival in these groups was significantly worse than in those with preserved or mildly reduced KCO ([Figure S3 A and B](#)). Even after adjusting for confounding factors (age, sex, comorbidities, smoking status and whether the case was prevalent or incident), KCO remained an independent predictor of survival ([Table S8](#)).

Age at diagnosis was calculated as age at the time of diagnostic right heart catheter (RHC) and was available in all but 10 cases. When patients were divided by age, those in higher age tertile showed more functional impairment despite milder haemodynamics, lower FEV1/FVC ratio and KCO % predicted as well as milder emphysematous and fibrotic changes on CT scans ([Figure S2 and Table S9](#)).

## Rare variants in previously established genes

We identified variants in previously established genes (namely, *BMPR2*, *ACVRL1*, *ENG*, *SMAD1*, *SMAD4*, *SMAD9*, *KCNK3*, *TBX4*, *EIF2AK4*, *AQP1*, *ATP13A3*, *GDF2*, *SOX17*) in 271 (24.2%) of the 1122 cases and interpreted them based on the ACMG standards and guidelines<sup>19</sup>. The

majority of these variants have already been described in Gräf *et al.*<sup>13</sup> ([see supplemental material](#)).

Larger deletions are depicted in [Figure S4 A-F](#).

## Rare variant association testing

We used the rare variant association test BeviMed to consolidate previously reported and discover novel genotype-phenotype associations. The BeviMed analysis identified 42 significant gene-tag associations with posterior probability (PP) above 0.6 ([Table 2](#) and [Figure 2A](#)). *BMPR2*, *TBX4*, *EIF2AK4*, *ACVRL1* show the highest association (PP  $\geq 0.99$ ) and further confirmed significant associations in the majority of other previously established genes<sup>13</sup>. Our analysis showed that individuals with rare variants in *BMPR2*, *TBX4*, *EIF2AK4* (autosomal recessive model) and *SOX17* have a significantly earlier age of disease onset (tag: young age). We also confirmed the association of rare variants in *AQP1* with HPAH (PP=0.994). The refined phenotype approach corroborated the association between mutations in *BMPR2* and preserved KCO (KCO higher tertile, PP=1) as well as an association between biallelic *EIF2AK4* mutations and significantly reduced KCO (KCO <50% predicted, PP=1).

Under an autosomal dominant mode of inheritance, protein-truncating variants (PTVs) in kinase insert domain receptor (*KDR*) were associated with a significantly reduced KCO (KCO lower tertile, PP=0.989), as well as older age at diagnosis (tag: old age, PP=0.912). Furthermore, KCO stratification highlighted an association between isocitrate dehydrogenase (NAD(+)) 3 non-catalytic subunit gamma (*IDH3G*) and moderately reduced KCO in patients with pulmonary hypertension (PP = 0.920).

## Rare variants in the new PAH risk genes: *KDR* and *IDH3G*

We identified a total of five rare protein-truncating variants in *KDR* in the study cohort. Four of these were in PAH cases: 1 frameshift variant in exon 3 of 30 (c.183del, p.Trp61CysfsTer16), 2 nonsense variants, one in exon 3 (c.183G>A, p.Trp61Ter) and one in exon 22 (c.3064C>T, p.Arg1022Ter) and 1 splice acceptor variant in intron 4 of 29 (c.490-1G>A). In addition, one nonsense variant was identified in exon 27 (p.Glu1206Ter) in a non-PAH control subject ([Table 3](#)). This latter nonsense variant appears late in the amino acid sequence, in exon 29 of 30, which might have limited impact on *KDR* function. Furthermore, 13 PAH cases (1%) and 102 non-PAH controls (0.9%) harboured rare predicted deleterious *KDR* missense variants ([Figure 3](#)). The missense variant carriers, however, did not exhibit a reduced KCO or older age of diagnosis. Instead, these patients show the opposite trend in KCO ([Table 4](#) and [Figure 2C and D](#)). Importantly, seven of the 13 *KDR* missense variants seen in the PAH cases also were detected in several non-PAH controls, and thus are unlikely to be playing a causal role. Furthermore, three of the *KDR* missense variants co-occurred with predicted deleterious variants in established PAH risk genes (two patients with variants in *BMP2R* and one with variant in *AQP1*).

We also identified three missense variants (c.74C>T, p.Pro25Leu; c.1037C>T, p.Thr346Ile; c.1067T>C, p.Met356Thr) and one large deletion (X:147511939-154854072) in the gene *IDH3G* in five individuals. The missense variant (c.74C>T, p.Pro25Leu) was present in two IPAH individuals, whereas the large deletion (X:147511939-154854072) was present in one IPAH and one control case. The “Moderate and high” impact category contributed to the detected association. IPAH patients harbouring variants in *IDH3G* were all females with early-onset disease, median age 34 [27;51] and relatively preserved KCO ([Table 3](#), [Table S11](#)).

## Clinical characterisation of *KDR* mutation carriers

Patients with PTV in *KDR* were older and exhibited significantly reduced KCO compared with *KDR* missense variant carriers and *BMPP2* mutation carriers ([Figure 2C](#)). In order to determine whether the reduction in KCO was the result of coexistent emphysema secondary to smoking or other parenchymal lung diseases, we performed a detailed analysis of thoracic CT imaging. Three of the four cases did not have a history of smoking. CT scans were available in all four patients harbouring PTV in *KDR* and showed a range of lung parenchymal changes in all four cases ([Figure 4](#)). W000229 had evidence of mild mainly subpleural ILD, mild emphysema and air trapping. W000274 had signs of ILD with traction bronchiectasis in the lower zones, mild air trapping, and mild diffuse ground glass opacities (GGO) and neovascularity. Also, E001392 showed mild centrilobular ground glass nodularity in addition to moderate pleural effusion and a trace of air trapping, but no ILD. In these cases it seemed likely that the observed parenchymal changes contributed to the low KCO. In contrast, E003448 had a low KCO despite only a trace of central non-specific ground glass change on the CT images. Comparisons of CT findings between patients harbouring deleterious mutations in *BMPP2*, *EIF2AK4*, *KDR*, other PAH risk genes and patients without mutations are presented in [Table S11](#). There were no differences in the frequency of comorbidities between patients harbouring missense and PTV in *KDR* although the frequency of systemic hypertension was high in both UK and US cohorts (44% and 50%, respectively) ([Table 4](#) and [Table S11](#)). None of the PTV carriers had a family history of PAH. Survival in this group could not be assessed because of the small number of patients harbouring the mutation, as well as only one event occurring in this group.



## Additional cases in US PAH cohorts

To replicate our findings, we analysed subjects recruited to the US PAH Biobank<sup>15</sup> and the Pulmonary Hypertension Center at Columbia University<sup>16</sup> to identify additional patients carrying predicted pathogenic rare variants in the new PAH risk genes. Four individuals harbouring *KDR* PTVs were identified. These comprised, 2 nonsense variants, one in exon 3 (c.303C>A, p.Tyr101Ter) and one in exon 22 (c.3064C>T, p.Arg1022Ter) and two splice donor variants, one in intron 2 of 29 (c.161+1G>T) and one in intron 5 (c.658+1G>A). Interestingly, the nonsense variant p.Arg1022Ter appeared in both cohorts ([Figure 3](#)). Patient-level data for these individuals are summarised in [Table S3](#). Three of the four patients were diagnosed with idiopathic PAH at 72, 65 and 42 years respectively, whereas one patient was diagnosed at age 4 with PAH associated with double outlet right ventricle. Diffusion capacity of carbon monoxide was available for one patient and was decreased at 35% predicted, with only minor pleural scarring in the left upper lobe found on CT imaging. Two out of four patients harbouring PTV in *KDR* had also been diagnosed with systemic hypertension.

Additionally, two individuals carrying missense variants in *IDH3G* locus were found in US PAH Biobank and Pulmonary Hypertension Center at Columbia University cohorts; one male neonate diagnosed with Scimitar syndrome, hypoplastic right lung and atrial septal defect (ASD) (c.1091C>T, p.Pro364Leu) and a 55-year-old female with large ASD (c.217G>C, p.Val73Leu).

## Discussion

One of the critical translational steps in identifying novel, causative genes in rare disorders is the discovery of genotype-phenotype associations to inform patient care and impact outcomes. A pragmatic focus on deeply-phenotyped individuals and “smart” experimental design cannot be

overestimated<sup>20</sup>. With this in mind, we studied the molecular genetic architecture of PAH using BeviMed<sup>18</sup>. To generate case/control labels, we tagged PAH cases with diagnostic labels and stratified them by age at diagnosis and KCO. Analyses were then performed to identify associations between tags and rare gene variants.

Our findings strongly suggest a link between rare protein-truncating *KDR* variants and reduced KCO and older age at diagnosis. The human *KDR* gene, located on chromosome 4q11–q12, encodes vascular endothelial growth factor receptor 2 (VEGFR-2)<sup>21</sup>. VEGFR-2 is composed of an extracellular domain, which comprises seven Ig-like domains (I–VII), of which domains II and III bind VEGF-A, a critical growth factor for physiological and pathological angiogenesis in vascular endothelial cells. In mice, even though *VegfA* haploinsufficiency is embryonically lethal<sup>22</sup>, heterozygosity of its receptor, *Vegfr2*, is compatible with life and unimpaired vascular development<sup>23</sup>.

The role of VEGF signalling in the pathogenesis of PAH has been an area of intense interest since reports of increased expression of VEGF, VEGFR1 and VEGFR2 in rat lung tissue in response to acute and chronic hypoxia<sup>24</sup>. An increase in lung VEGF has also been reported in rats with PH following monocrotaline exposure<sup>25</sup>. In humans, VEGFA is highly expressed in plexiform lesions in patients with IPAH<sup>26</sup>, tracheal aspirates from neonates with a persistent PH of the newborn<sup>27</sup> and small pulmonary arteries from infants with PH associated with a congenital diaphragmatic hernia<sup>28</sup>. In view of these findings, it is surprising that the overexpression of VEGFA ameliorates hypoxia-induced PAH<sup>29</sup>. In contrast, inhibition of VEGF signalling by SU5416 (sugen) combined with chronic hypoxia triggers severe angioproliferative PH<sup>30</sup>. SU5416, a small-molecule inhibitor of the tyrosine kinase segment of VEGF receptors inhibits VEGFR1<sup>31</sup> and VEGFR2<sup>32</sup> causing endothelial cell apoptosis, loss of lung capillaries and emphysema<sup>33</sup>. In combination with chronic hypoxia, SU5416 causes cell-death dependent compensatory pulmonary endothelial cell proliferation and severe PH<sup>30</sup>. Further evidence supporting the role of VEGF inhibition in the

pathobiology of PAH comes from reports of PH in patients treated with bevacizumab<sup>34</sup> and the multi-tyrosine kinase inhibitors, dasatinib<sup>35</sup> and bosutinib, have also been associated with PAH<sup>36</sup>. Both preclinical and patient data show that inhibition of VEGF is associated with considerable cardiovascular side effects<sup>37</sup>. Among common side effects of VEGF inhibitors are systemic hypertension, proteinuria, renal impairment and thyroid dysfunction. The overall incidence of systemic hypertension induced by bevacizumab and RTKIs scale from 9 to 67% and is dose-dependent<sup>38</sup>. Mechanisms implicated in systemic hypertensive response include impairment of nitric oxide (NO) signalling, increased arterial stiffness<sup>39</sup>, reduced capillary density<sup>40</sup> or functional rarefaction<sup>41</sup> and activation of the endothelin system<sup>42</sup>, all of which are relevant to the pathobiology of PAH. Notably, two out of four of our cases with PTVs at the *KDR* locus had systemic hypertension. Also, the frequency of thyroid dysfunction was higher (although not statistically significant) in patients with *KDR* PTVs (25% UK cohort, 50% US cohort) than in patients without mutations in PAH risk genes (13.2%). The proportion of patients with renal impairment was not different between *KDR* PTV and missense variant carriers or the rest of the study population. Mutations in *KDR* have also been reported in other cardiovascular diseases; Bleyl et al. reported that *KDR* might be a candidate for familial total anomalous pulmonary venous return<sup>43</sup>. In addition, haploinsufficiency in *KDR* locus has also been associated with tetralogy of Fallot<sup>44</sup>. We report one patient (US cohort) with PAH associated with congenital heart disease and *KDR* protein-truncating splice donor variant (c.161+1G>T). *IDH3G* is a protein-coding gene encoding enzyme catalyzing the decarboxylation of isocitrate (ICT) into alpha-ketoglutarate, a tricarboxylic acid (TCA) cycle intermediate. Metabolomic<sup>3</sup> and imaging studies<sup>45</sup> have previously shown disrupted bioenergetics in IPAH characterised by the accumulation of TCA cycle intermediates. This indicates suppression of mitochondrial glucose oxidation, central to which is inhibition of pyruvate dehydrogenase (PDH)<sup>46</sup>. Alpha-ketoglutarate is a required cofactor for PDH, the enzyme that under normal conditions causes proteasomal degradation of hypoxia-

inducible factor (HIF)<sup>47</sup>. Citrate and alpha-ketoglutarate have also been implicated in acetylation<sup>48</sup> and methylation<sup>49</sup> of nuclear histones. Interestingly isocitrate dehydrogenase (IDH) activity has been reported to be increased both in PAEC and serum in patients harbouring *BMP2* pathogenic variants<sup>50</sup>. IDH has the capacity to catalyze against TCA flow by converting alpha-ketoglutarate to isocitrate leading to depletion of the PDH co-factor alpha-ketoglutarate and causing decreased hydroxylation of HIF leading to its proteasomal degradation<sup>50</sup>. Such findings have potential therapeutic implications, as pyruvate dehydrogenase kinase inhibitor (dichloroacetate) has shown some efficacy in genetically susceptible PAH patients<sup>51</sup>.

In the present study, we highlight that deep clinical phenotyping in combination with genotype data can accelerate the identification of novel disease risk genes and disease subtypes, which may have prognostic and therapeutic implications. Of particular interest is the association of *KDR* PTVs with significantly reduced KCO. Reduced KCO, which reflects impairment of alveolar-capillary membrane function, has been noted in the analysis of early registry data<sup>52</sup> to be an independent predictor of survival. Decreased KCO was also found in patients with PVOD/PCH with or without biallelic *EIF2AK4* mutations<sup>53</sup>. Although some reduction in KCO is one of the typical features of pulmonary vascular disease, PVOD patients show the lowest KCO values when compared to IPAH or CTEPH. In contrast, KCO is relatively preserved in *BMP2* mutation carriers<sup>54</sup>. Strong association with survival and a link with other causative mutations makes the KCO phenotype particularly attractive for genetic studies, and KCO should be consistently collected in future PAH registries.

As lung disease should always be taken under consideration as a cause of low KCO, we applied the World Symposium on PH criteria<sup>55</sup> to exclude lung disease as a cause of PH: TLC  $\geq$ 70% pred., FVC  $\geq$ 70% pred., FEV1  $\geq$ 60% pred., and no severe fibrosis and/or emphysema on chest HRCT. None of the PTV *KDR* cases met these criteria although two of the four patients did show evidence of early ILD. Another potential reason for low KCO in the PAH population is the

diagnosis of PVOD/PCH<sup>56</sup>. Again, careful analysis of CT scans and clinical data did not reveal convincing evidence for this diagnosis in *KDR* PTV carriers. Cigarette smoking is a well-known factor leading to the decrease of KCO, which can be explained by increased carboxyhemoglobin levels<sup>57</sup> and smoking-induced emphysema<sup>58</sup>; only one of the 4 *KDR* PTV carriers was a previous smoker with 15 pack-years of exposure but non-smoker for over 20 years prior to diagnosis and with no signs of emphysema on CT. These findings suggest that PTVs in *KDR* are associated with a form of PAH characterised by a range of lung parenchymal abnormalities, including small airways disease, emphysema and ILD, as two of the four patients harbouring PTV in *KDR* had mild fibrotic lung changes. Of note, the patients with mutations in other PAH risk genes or those without identified genetic mutation showed less than 10% incidence of fibrotic changes on CT imaging. Further larger studies are needed to determine the full range of lung parenchymal abnormalities in PAH cases with PTVs in *KDR*.

In summary, this study shows how deep phenotyping enabled patient stratification into subgroups with shared pathobiology and increased the power to detect genotype-phenotype associations. We provided statistical evidence of a strong association between PTVs in the *KDR* and significantly decreased KCO as well as later age of disease onset, and moderate impact variants in *IDH3G* and preserved KCO.

## Acknowledgements

We thank NIHR BioResource volunteers for their participation, and gratefully acknowledge NIHR BioResource centres, NHS Trusts and staff for their contribution. We thank the National Institute for Health Research and NHS Blood and Transplant. The views expressed are those of the author(s) and not necessarily those of the NHS, the NIHR or the Department of Health and Social Care.

We thank the research nurses and coordinators at the specialist pulmonary hypertension centres involved in this study. We acknowledge the support of the Imperial NIHR Clinical Research Facility, the Netherlands CardioVascular Research Initiative, the Dutch Heart Foundation, Dutch Federation of University Medical Centres, the Netherlands Organisation for Health Research and Development and the Royal Netherlands Academy of Sciences. We thank all the patients and their families who contributed to this research and the Pulmonary Hypertension Association (UK) for their support.

We thank contributors, including the Pulmonary Hypertension Centers who collected samples used in this study, as well as patients and their families, whose help and participation made this work possible. Exome sequencing and genotyping data were generated by the Regeneron Genetics Center.

PAH Biobank Enrolling Centers' Investigators: Russel Hirsch, MD; R. James White, MD, PhD; Marc Simon, MD; David Badesch, MD; Erika Rosenzweig, MD; Charles Burger, MD; Murali Chakinala, MD; Thenappan Thenappan, MD; Greg Elliott, MD; Robert Simms, MD; Harrison Farber, MD; Robert Frantz, MD; Jean Elwing, MD; Nicholas Hill, MD; Dunbar Ivy, MD; James Klinger, MD; Steven Nathan, MD; Ronald Oudiz, MD; Ivan Robbins, MD; Robert Schilz, DO, PhD; Terry Fortin, MD; Jeffrey Wilt, MD; Delphine Yung, MD; Eric Austin, MD; Ferhaan Ahmad, MD, PhD; Nitin Bhatt, MD; Tim Lahm, MD; Adaani Frost, MD; Zeenat Safdar, MD; Zia Rehman, MD; Robert Walter, MD; Fernando Torres, MD; Sahil Bakshi, DO; Stephen Archer, MD; Rahul Argula, MD; Christopher Barne

## Sources of Funding

The UK National Cohort of Idiopathic and Heritable PAH is supported by the NIHRBR-RD, the British Heart Foundation (BHF) (SP/12/12/29836), the BHF Cambridge Centre of Cardiovascular

Research Excellence, and the UK Medical Research Council (MR/K020919/1), the Dinosaur Trust, BHF Programme grants to RCT (RG/08/006/25302) and NWM (RG/13/4/30107), and the UK NIHR National Institute for Health Research Cambridge Biomedical Research Centre. NWM is a BHF Professor and NIHR Senior Investigator. AL is supported by a BHF Senior Basic Science Research Fellowship (FS/13/48/30453).

Samples and/or data from the National Biological Sample and Data Repository for PAH, funded by an NIH investigator-initiated resources grant (R24 HL105333 to WCN), were used in this study.

## Disclosures

NWM is a Director and Co-founder of Morphogen-IX. JW received personal fees from Actelion Pharmaceuticals. GK reports personal fees and non-financial support from Actelion Pharmaceuticals, Bayer, GSK, MSD, Boehringer Ingelheim, Novartis, Chiesi and Vitalaire outside the submitted work. CJR declares fees from Actelion Pharmaceuticals and United Therapeutics. AL received support and fees from GSK and Actelion Pharmaceuticals.

## References

1. Voelkel NF, Gomez-Arroyo J, Abbate A, Bogaard HJ, Nicolls MR. Pathobiology of pulmonary arterial hypertension and right ventricular failure [Internet]. *European Respiratory Journal*. 2012;40:1555–1565. Available from: <http://dx.doi.org/10.1183/09031936.00046612>
2. Tuder RM, Groves B, Badesch DB, Voelkel NF. Exuberant endothelial cell growth and elements of inflammation are present in plexiform lesions of pulmonary hypertension. *Am J Pathol*. 1994;144:275–285.
3. Rhodes CJ, Ghataorhe P, Wharton J, Rue-Albrecht KC, Hadinnapola C, Watson G, Bleda M, Haimel M, Coghlan G, Corris PA, Howard LS, Kiely DG, Peacock AJ, Pepke-Zaba J, Toshner MR, Wort SJ, Gibbs JSR, Lawrie A, Gräf S, Morrell NW, Wilkins MR. Plasma Metabolomics Implicates Modified Transfer RNAs and Altered Bioenergetics in the Outcomes of Pulmonary Arterial Hypertension. *Circulation*. 2017;135:460–475.
4. Pullamsetti SS, Savai R, Seeger W, Goncharova EA. Translational Advances in the Field of Pulmonary Hypertension. From Cancer Biology to New Pulmonary Arterial Hypertension Therapeutics. Targeting Cell Growth and Proliferation Signaling Hubs. *Am J Respir Crit Care Med*. 2017;195:425–437.
5. Thomson J, Machado R, Pauciulo M, Morgan N, Yacoub M, Corris P, McNeil K, Loyd J, Nichols W, Trembath R. Familial and sporadic primary pulmonary hypertension is caused by BMPR2 gene mutations resulting in haploinsufficiency of the bone morphogenetic protein type II receptor. *J Heart Lung Transplant*. 2001;20:149.



6. Machado RD, Pauciulo MW, Thomson JR, Lane KB, Morgan NV, Wheeler L, Phillips JA 3rd, Newman J, Williams D, Galiè N, Manes A, McNeil K, Yacoub M, Mikhail G, Rogers P, Corris P, Humbert M, Donnai D, Martensson G, Tranebjaerg L, Loyd JE, Trembath RC, Nichols WC. BMPR2 haploinsufficiency as the inherited molecular mechanism for primary pulmonary hypertension. *Am J Hum Genet.* 2001;68:92–102.
7. Larkin EK, Newman JH, Austin ED, Hemnes AR, Wheeler L, Robbins IM, West JD, Phillips JA 3rd, Hamid R, Loyd JE. Longitudinal analysis casts doubt on the presence of genetic anticipation in heritable pulmonary arterial hypertension. *Am J Respir Crit Care Med.* 2012;186:892–896.
8. Trembath RC. Mutations in the TGF-beta type 1 receptor, ALK1, in combined primary pulmonary hypertension and hereditary haemorrhagic telangiectasia, implies pathway specificity. *J Heart Lung Transplant.* 2001;20:175.
9. Chaouat A. Endoglin germline mutation in a patient with hereditary haemorrhagic telangiectasia and dexfenfluramine associated pulmonary arterial hypertension [Internet]. *Thorax.* 2004;59:446–448. Available from: <http://dx.doi.org/10.1136/thx.2003.11890>
10. Shintani M, Yagi H, Nakayama T, Saji T, Matsuoka R. A new nonsense mutation of SMAD8 associated with pulmonary arterial hypertension [Internet]. *Journal of Medical Genetics.* 2009;46:331–337. Available from: <http://dx.doi.org/10.1136/jmg.2008.062703>
11. Austin ED, Ma L, LeDuc C, Berman Rosenzweig E, Borczuk A, Phillips JA 3rd, Palomero T, Sumazin P, Kim HR, Talati MH, West J, Loyd JE, Chung WK. Whole exome sequencing to identify a novel gene (caveolin-1) associated with human pulmonary arterial hypertension. *Circ Cardiovasc Genet.* 2012;5:336–343.

12. Ma L, Roman-Campos D, Austin ED, Eyries M, Sampson KS, Soubrier F, Germain M, Trégouët D-A, Borczuk A, Rosenzweig EB, Girerd B, Montani D, Humbert M, Loyd JE, Kass RS, Chung WK. A Novel Channelopathy in Pulmonary Arterial Hypertension [Internet]. *New England Journal of Medicine*. 2013;369:351–361. Available from: <http://dx.doi.org/10.1056/nejmoa1211097>
13. Gräf S, Haimel M, Bleda M, Hadinnapola C, Southgate L, Li W, Hodgson J, Liu B, Salmon RM, Southwood M, Machado RD, Martin JM, Treacy CM, Yates K, Daugherty LC, Shamardina O, Whitehorn D, Holden S, Aldred M, Bogaard HJ, Church C, Coghlan G, Condliffe R, Corris PA, Danesino C, Eyries M, Gall H, Ghio S, Ghofrani H-A, Gibbs JSR, Girerd B, Houweling AC, Howard L, Humbert M, Kiely DG, Kovacs G, MacKenzie Ross RV, Moledina S, Montani D, Newnham M, Olschewski A, Olschewski H, Peacock AJ, Pepke-Zaba J, Prokopenko I, Rhodes CJ, Scelsi L, Seeger W, Soubrier F, Stein DF, Suntharalingam J, Swietlik EM, Toshner MR, van Heel DA, Vonk Noordegraaf A, Waisfisz Q, Wharton J, Wort SJ, Ouwehand WH, Soranzo N, Lawrie A, Upton PD, Wilkins MR, Trembath RC, Morrell NW. Identification of rare sequence variation underlying heritable pulmonary arterial hypertension. *Nat Commun*. 2018;9:1416.
14. The NIHR BioResource, on behalf of the 100,000 Genomes Project. Whole-genome sequencing of rare disease patients in a national healthcare system. *Nature* [Internet]. Available from: <https://www.biorxiv.org/content/10.1101/507244v1>
15. Zhu N, Pauciulo MW, Welch CL, Lutz KA, Coleman AW, Gonzaga-Jauregui C, Wang J, Grimes JM, Martin LJ, He H, PAH Biobank Enrolling Centers' Investigators, Shen Y, Chung WK, Nichols WC. Novel risk genes and mechanisms implicated by exome sequencing of 2572 individuals with pulmonary arterial hypertension. *Genome Med*.

2019;11:69.

16. Zhu N, Welch CL, Wang J, Allen PM, Gonzaga-Jauregui C, Ma L, King AK, Krishnan U, Rosenzweig EB, Ivy DD, Austin ED, Hamid R, Pauciulo MW, Lutz KA, Nichols WC, Reid JG, Overton JD, Baras A, Dewey FE, Shen Y, Chung WK. Rare variants in SOX17 are associated with pulmonary arterial hypertension with congenital heart disease. *Genome Med.* 2018;10:56.
17. Raczy C, Petrovski R, Saunders CT, Chorny I, Kruglyak S, Margulies EH, Chuang H-Y, Källberg M, Kumar SA, Liao A, Little KM, Strömberg MP, Tanner SW. Isaac: ultra-fast whole-genome secondary analysis on Illumina sequencing platforms. *Bioinformatics.* 2013;29:2041–2043.
18. Greene D, NIHR BioResource, Richardson S, Turro E. A Fast Association Test for Identifying Pathogenic Variants Involved in Rare Diseases. *Am J Hum Genet.* 2017;101:104–114.
19. Richards S, Aziz N, Bale S, Bick D, Das S, Gastier-Foster J, Grody WW, Hegde M, Lyon E, Spector E, Voelkerding K, Rehm HL, ACMG Laboratory Quality Assurance Committee. Standards and guidelines for the interpretation of sequence variants: a joint consensus recommendation of the American College of Medical Genetics and Genomics and the Association for Molecular Pathology. *Genet Med.* 2015;17:405–424.
20. FitzGerald G, Botstein D, Califf R, Collins R, Peters K, Van Bruggen N, Rader D. The future of humans as model organisms [Internet]. *Science.* 2018;361:552–553. Available from: <http://dx.doi.org/10.1126/science.aau7779>
21. Terman BI, Carrion ME, Kovacs E, Rasmussen BA, Eddy RL, Shows TB. Identification of a

- new endothelial cell growth factor receptor tyrosine kinase. *Oncogene*. 1991;6:1677–1683.
22. Ferrara N, Carver-Moore K, Chen H, Dowd M, Lu L, O’Shea KS, Powell-Braxton L, Hillan KJ, Moore MW. Heterozygous embryonic lethality induced by targeted inactivation of the VEGF gene. *Nature*. 1996;380:439–442.
  23. Oladipupo SS, Smith C, Santeford A, Park C, Sene A, Wiley LA, Osei-Owusu P, Hsu J, Zapata N, Liu F, Nakamura R, Lavine KJ, Blumer KJ, Choi K, Apte RS, Ornitz DM. Endothelial cell FGF signaling is required for injury response but not for vascular homeostasis [Internet]. *Proceedings of the National Academy of Sciences*. 2014;111:13379–13384. Available from: <http://dx.doi.org/10.1073/pnas.1324235111>
  24. Tuder RM, Flook BE, Voelkel NF. Increased gene expression for VEGF and the VEGF receptors KDR/Flk and Flt in lungs exposed to acute or to chronic hypoxia. Modulation of gene expression by nitric oxide. *J Clin Invest*. 1995;95:1798–1807.
  25. Cho YJ, Han JY, Lee SG, Jeon BT, Choi WS, Hwang YS, Roh GS, Lee JD. Temporal changes of angiopoietins and Tie2 expression in rat lungs after monocrotaline-induced pulmonary hypertension. *Comp Med*. 2009;59:350–356.
  26. Tuder RM, Chacon M, Alger L, Wang J, Taraseviciene-Stewart L, Kasahara Y, Cool CD, Bishop AE, Geraci M, Semenza GL, Yacoub M, Polak JM, Voelkel NF. Expression of angiogenesis-related molecules in plexiform lesions in severe pulmonary hypertension: evidence for a process of disordered angiogenesis [Internet]. *The Journal of Pathology*. 2001;195:367–374. Available from: <http://dx.doi.org/10.1002/path.953.abs>
  27. Lassus P, Turanlahti M, Heikkilä P, Andersson LC, Nupponen I, Sarnesto A, Andersson S. Pulmonary Vascular Endothelial Growth Factor and Flt-1 in Fetuses, in Acute and Chronic

Lung Disease, and in Persistent Pulmonary Hypertension of the Newborn [Internet].

American Journal of Respiratory and Critical Care Medicine. 2001;164:1981–1987.

Available from: <http://dx.doi.org/10.1164/ajrccm.164.10.2012036>

28. Shehata SM, Mooi WJ, Okazaki T, El-Banna I, Sharma HS, Tibboel D. Enhanced expression of vascular endothelial growth factor in lungs of newborn infants with congenital diaphragmatic hernia and pulmonary hypertension. *Thorax*. 1999;54:427–431.
29. Partovian C, Adnot S, Raffestin B, Louzier V, Levame M, Mavier IM, Lemarchand P, Eddahibi S. Adenovirus-mediated lung vascular endothelial growth factor overexpression protects against hypoxic pulmonary hypertension in rats. *Am J Respir Cell Mol Biol*. 2000;23:762–771.
30. Taraseviciene-Stewart L, Kasahara Y, Alger L, Hirth P, Mc Mahon G, Waltenberger J, Voelkel NF, Tuder RM. Inhibition of the VEGF receptor 2 combined with chronic hypoxia causes cell death-dependent pulmonary endothelial cell proliferation and severe pulmonary hypertension. *FASEB J*. 2001;15:427–438.
31. Itokawa T, Nokihara H, Nishioka Y, Sone S, Iwamoto Y, Yamada Y, Cherrington J, McMahon G, Shibuya M, Kuwano M, Ono M. Antiangiogenic effect by SU5416 is partly attributable to inhibition of Flt-1 receptor signaling. *Mol Cancer Ther*. 2002;1:295–302.
32. Fong TA, Shawver LK, Sun L, Tang C, App H, Powell TJ, Kim YH, Schreck R, Wang X, Risau W, Ullrich A, Hirth KP, McMahon G. SU5416 is a potent and selective inhibitor of the vascular endothelial growth factor receptor (Flk-1/KDR) that inhibits tyrosine kinase catalysis, tumor vascularization, and growth of multiple tumor types. *Cancer Res*. 1999;59:99–106.

33. Kasahara Y, Tuder RM, Taraseviciene-Stewart L, Le Cras TD, Abman S, Hirth PK, Waltenberger J, Voelkel NF. Inhibition of VEGF receptors causes lung cell apoptosis and emphysema. *J Clin Invest*. 2000;106:1311–1319.
34. Garcia AA, Hirte H, Fleming G, Yang D, Tsao-Wei DD, Roman L, Groshen S, Swenson S, Markland F, Gandara D, Scudder S, Morgan R, Chen H, Lenz H-J, Oza AM. Phase II Clinical Trial of Bevacizumab and Low-Dose Metronomic Oral Cyclophosphamide in Recurrent Ovarian Cancer: A Trial of the California, Chicago, and Princess Margaret Hospital Phase II Consortia [Internet]. *Journal of Clinical Oncology*. 2008;26:76–82. Available from: <http://dx.doi.org/10.1200/jco.2007.12.1939>
35. Montani D, Bergot E, Günther S, Savale L, Bergeron A, Bourdin A, Bouvaist H, Canuet M, Pison C, Macro M, Poubeau P, Girerd B, Natali D, Guignabert C, Perros F, O’Callaghan DS, Jaïs X, Tubert-Bitter P, Zalcman G, Sitbon O, Simonneau G, Humbert M. Pulmonary Arterial Hypertension in Patients Treated by Dasatinib [Internet]. *Circulation*. 2012;125:2128–2137. Available from: <http://dx.doi.org/10.1161/circulationaha.111.079921>
36. Ashraf O, Naddour M, Babar L, Beg M, Malik K. SECOND GENERATION TYROSINE KINASE INHIBITOR BOSUTINIB AS NOVEL CAUSE OF SEVERE PULMONARY HYPERTENSION: UNMASKING THE CULPRIT [Internet]. *Chest*. 2018;154:1047A. Available from: <http://dx.doi.org/10.1016/j.chest.2018.08.945>
37. Kamba T, McDonald DM. Mechanisms of adverse effects of anti-VEGF therapy for cancer. *Br J Cancer*. 2007;96:1788–1795.
38. Zheng Y, Chen J, Lu Y. Incidence and risk of hypertension with bevacizumab in non-small-cell lung cancer patients: a meta-analysis of randomized controlled trials [Internet].

Drug Design, Development and Therapy. 2015;4751. Available from:

<http://dx.doi.org/10.2147/dddt.s87258>

39. Steeghs N, Gelderblom H, Roodt JO 't, Christensen O, Rajagopalan P, Hovens M, Putter H, Rabelink TJ, de Koning E. Hypertension and rarefaction during treatment with telatinib, a small molecule angiogenesis inhibitor. *Clin Cancer Res*. 2008;14:3470–3476.
40. van den Meiracker AH, Danser AHJ, Sleijfer S, Kappers MHW. Re: Hypertension as a Biomarker of Efficacy in Patients With Metastatic Renal Cell Carcinoma Treated With Sunitinib [Internet]. *JNCI Journal of the National Cancer Institute*. 2011;103:1557–1557. Available from: <http://dx.doi.org/10.1093/jnci/djr328>
41. Levy BI, Ambrosio G, Pries AR, Struijker-Boudier HAJ. Microcirculation in Hypertension [Internet]. *Circulation*. 2001;104:735–740. Available from: <http://dx.doi.org/10.1161/hc3101.091158>
42. Kappers MHW, van Esch JHM, Sluiter W, Sleijfer S, Jan Danser AH, van den Meiracker AH. Hypertension Induced by the Tyrosine Kinase Inhibitor Sunitinib Is Associated With Increased Circulating Endothelin-1 Levels [Internet]. *Hypertension*. 2010;56:675–681. Available from: <http://dx.doi.org/10.1161/hypertensionaha.109.149690>
43. Bleyl S, Nelson L, Odelberg SJ, Ruttenberg HD, Otterud B, Leppert M, Ward K. A gene for familial total anomalous pulmonary venous return maps to chromosome 4p13-q12. *Am J Hum Genet*. 1995;56:408–415.
44. Reuter MS, Jobling R, Chaturvedi RR, Manshaei R, Costain G, Heung T, Curtis M, Hosseini SM, Liston E, Lowther C, Oechslin E, Sticht H, Thiruvahindrapuram B, van Mil S, Wald RM, Walker S, Marshall CR, Silversides CK, Scherer SW, Kim RH, Bassett AS.

- Haploinsufficiency of vascular endothelial growth factor related signaling genes is associated with tetralogy of Fallot. *Genet Med.* 2019;21:1001–1007.
45. Sakao S, Miyauchi H, Voelkel NF, Sugiura T, Tanabe N, Kobayashi Y, Tatsumi K. Increased Right Ventricular Fatty Acid Accumulation in Chronic Thromboembolic Pulmonary Hypertension. *Ann Am Thorac Soc.* 2015;12:1465–1472.
  46. Sutendra G, Dromparis P, Bonnet S, Haromy A, McMurtry MS, Chris Bleackley R, Michelakis ED. Pyruvate dehydrogenase inhibition by the inflammatory cytokine TNF $\alpha$  contributes to the pathogenesis of pulmonary arterial hypertension [Internet]. *Journal of Molecular Medicine.* 2011;89:771–783. Available from: <http://dx.doi.org/10.1007/s00109-011-0762-2>
  47. Salceda S, Caro J. Hypoxia-inducible Factor 1 $\alpha$  (HIF-1 $\alpha$ ) Protein Is Rapidly Degraded by the Ubiquitin-Proteasome System under Normoxic Conditions [Internet]. *Journal of Biological Chemistry.* 1997;272:22642–22647. Available from: <http://dx.doi.org/10.1074/jbc.272.36.22642>
  48. Wellen KE, Hatzivassiliou G, Sachdeva UM, Bui TV, Cross JR, Thompson CB. ATP-citrate lyase links cellular metabolism to histone acetylation. *Science.* 2009;324:1076–1080.
  49. Johnson D. *Cell Death Signaling in Cancer Biology and Treatment.* Springer Science & Business Media; 2012.
  50. Fessel JP, Hamid R, Wittmann BM, Robinson LJ, Blackwell T, Tada Y, Tanabe N, Tatsumi K, Hemnes AR, West JD. Metabolomic analysis of bone morphogenetic protein receptor type 2 mutations in human pulmonary endothelium reveals widespread metabolic reprogramming. *Pulm Circ.* 2012;2:201–213.



51. Michelakis ED, Gurtu V, Webster L, Barnes G, Watson G, Howard L, Cupitt J, Paterson I, Thompson RB, Chow K, O'Regan DP, Zhao L, Wharton J, Kiely DG, Kinnaird A, Boukouris AE, White C, Nagendran J, Freed DH, Wort SJ, Gibbs JSR, Wilkins MR. Inhibition of pyruvate dehydrogenase kinase improves pulmonary arterial hypertension in genetically susceptible patients. *Sci Transl Med* [Internet]. 2017;9. Available from: <http://dx.doi.org/10.1126/scitranslmed.aao4583>
52. Test VJ, Farber HW, McGoon MD, Parsons L, Channick RN. Pulmonary Arterial Hypertension in the Elderly: Baseline Characteristics and Evaluation of Therapeutics. An Examination of the Reveal Registry [Internet]. B27. FROM ALPHA TO OMEGA: ASSESSMENT AND OUTCOMES IN PULMONARY HYPERTENSION. 2009; Available from: [http://dx.doi.org/10.1164/ajrccm-conference.2009.179.1\\_meetingabstracts.a2649](http://dx.doi.org/10.1164/ajrccm-conference.2009.179.1_meetingabstracts.a2649)
53. Hadinnapola C, Bleda M, Haimel M, Screatton N, Swift A, Dorfmueller P, Preston SD, Southwood M, Hernandez-Sanchez J, Martin J, Treacy C, Yates K, Bogaard H, Church C, Coghlan G, Condliffe R, Corris PA, Gibbs S, Girerd B, Holden S, Humbert M, Kiely DG, Lawrie A, Machado R, MacKenzie Ross R, Moledina S, Montani D, Newnham M, Peacock A, Pepke-Zaba J, Rayner-Matthews P, Shamardina O, Soubrier F, Southgate L, Suntharalingam J, Toshner M, Trembath R, Vonk Noordegraaf A, Wilkins MR, Wort SJ, Wharton J, NIHR BioResource–Rare Diseases Consortium; UK National Cohort Study of Idiopathic and Heritable PAH, Gräf S, Morrell NW. Phenotypic Characterization of Mutation Carriers in a Large Cohort of Patients Diagnosed Clinically With Pulmonary Arterial Hypertension. *Circulation*. 2017;136:2022–2033.
54. Trip P, Girerd B, Bogaard H-J, de Man FS, Boonstra A, Garcia G, Humbert M, Montani D, Vonk-Noordegraaf A. Diffusion capacity and BMPR2 mutations in pulmonary arterial

- hypertension. *Eur Respir J*. 2014;43:1195–1198.
55. Nathan SD, Barbera JA, Gaine SP, Harari S, Martinez FJ, Olschewski H, Olsson KM, Peacock AJ, Pepke-Zaba J, Provencher S, Weissmann N, Seeger W. Pulmonary hypertension in chronic lung disease and hypoxia. *Eur Respir J* [Internet]. 2019;53. Available from: <http://dx.doi.org/10.1183/13993003.01914-2018>
56. Montani D, Dorfmüller P, Maitre S, Jaïs X, Sitbon O, Simonneau G, Humbert M. [Pulmonary veno-occlusive disease and pulmonary capillary hemangiomatosis]. *Presse Med*. 2010;39:134–143.
57. Sansores RH, Pare PD, Abboud RT. Acute effect of cigarette smoking on the carbon monoxide diffusing capacity of the lung. *Am Rev Respir Dis*. 1992;146:951–958.
58. López-Campos JL, Soler-Cataluña JJ, Miravittles M. Global Strategy for the Diagnosis, Management, and Prevention of Chronic Obstructive Lung Disease 2019 Report: Future Challenges [Internet]. *Archivos de Bronconeumología*. 2019; Available from: <http://dx.doi.org/10.1016/j.arbres.2019.06.001>

## Figure legends

**Figure 1. Design of the genetic association study.** **A**, Overview of the analytical approach. Using deep phenotyping, data tags were assigned to patients who shared phenotypic features (see [Figure S1](#) for more details). Rare sequence variants, called from whole-genome sequencing data, were filtered and explained cases were labelled. BeviMed was applied to a set of unrelated individuals, to test the posterior probability of gene-tag associations. **B**, Consort diagram summarising the size of the study cohort. **C**, Schematic representation of the definition of cases, exemplified by the KCO lower tertile tag. Cases were defined as individuals carrying a particular tag, whereas patients with missing information or those without a tag were removed from the gene-tag association testing. Individuals from non-PAH domains served as controls. KCO - transfer coefficient of carbon monoxide, MAF - minor allele frequency.

**Figure 2. Genetic association study results revealing established and novel genotype-phenotype links.** **A**, Figure showing phenotype tags on the x-axis and their corresponding posterior probability on the y-axis, as calculated by BeviMed. This measure predicts associations between tags and rare, predicted deleterious variants within a given gene. The definitions of the tags are listed in [Table 1](#). Shape and colour of points indicate the mode of inheritance and consequence type/impact of variants driving the association. Box-and-whisker plots showing the distribution of transfer coefficient of carbon monoxide (**B**) and age at diagnosis (**C**) stratified by genotype across the PAH domain. The two-tailed Wilcoxon signed-rank test was used to determine differences in the medians of the distributions, which are indicated by the bars at the top of the figures providing the respective p-values. bial. - biallelic, het. - heterozygous, pt. - protein-truncating, mis. - missense.

**Figure 3. Summary of single nucleotide variants (SNVs), small insertions and deletions (indels) and large deletions identified in the two novel candidate PAH disease risk genes.**

Only predicted deleterious variants in *KDR* (A) and *IDH3G* (B, C) are shown (MAF<1/10,000 and CADD≥15). SNVs and indels are represented by coloured lollipops on top of the protein sequence. Lollipop colour indicates the consequence type and size represents the variant frequency within a cohort. The domain annotations were retrieved from Uniprot (accession numbers P35968 [*KDR* (A)] and P51553 [*IDH3G* (D)]). PTVs are labelled with the respective HGVS notation. Splice variants are marked by dark grey arrows. The large deletion identified in *IDH3G* (C) is depicted in light blue; the respective gene locus is highlighted in red. The number of variants by predicted consequence type and cohort is provided in the tables.

**Figure 4. Pulmonary computerised tomography (CT) scans of patients carrying protein-**

**truncating *KDR* mutations. A,** Axial image of pulmonary CT angiogram at the level of the right ventricle (RV) moderator band, showing flattening of intraventricular septum, leftwards bowing of the interatrial septum and the enlargement of the right atrium (RA) and RV, indicative of RV strain; bilateral pleural effusion, larger on the right side. **B,** Axial image of a pulmonary CT angiogram demonstrating enlarged pulmonary artery and mild central lung ground glass opacity (GGO). **C,** Axial high-resolution CT slice of the chest in the lung window showing a trace of non-specific GGO with a central distribution. **D,** Coronal image showing the trace of central GGO and enlarged central pulmonary arteries. Axial high-resolution CT slice of the chest in the lung window showing apical subpleural fibrosis (**E**), and very minor subpleural fibrosis at the lung bases (**F**). Axial high-resolution CT slice of the chest in the lung window showing subpleural GGO

at apical level (**G**), and mild GGO at mid-thoracic level (**H**). Patients: E001392 (**A, B**), E003448 (**C, D**), W000229 (**E, F**), W000274 (**G and H**).

## Supplemental figure legends

**Figure S1. Summary of missing data.** **A**, The fraction of missing data for KCO, in comparison to diagnosis, age at diagnosis and lung function tests. **B**, The missingness pattern in KCO, in relation to diagnosis, age at diagnosis and lung function tests. KCO - transfer coefficient of carbon monoxide. FEV<sub>1</sub> - forced expiratory volume in 1 second, FVC - forced vital capacity, TLC - total lung capacity.

**Figure S2. Flowchart describing the definition of diagnostic and phenotypic tags.** A detailed description is provided in the supplemental material. The definition of tags is listed in [Table 1](#).

**Figure S3. Characterisation and survival analysis of the cohort.** Distribution of transfer coefficient of carbon monoxide (KCO), coloured by KCO tertiles (**A**), and coloured by KCO below and above the 50% predicted threshold (**B**). **C**, Distribution of age tertiles. **D**, Kaplan-Meier survival curves for KCO tertiles. **E**, Kaplan-Meier survival curves for KCO below and above 50% predicted threshold. **F**, Kaplan-Meier survival curves for age tertiles.

**Figure S4. Summary of large deletions identified in previously established disease genes.** Deletions are indicated by light blue boxes. The protein-coding genes, annotated in the displayed region by Ensembl (GRCh37, version 75), are depicted in the bottom panels. The affected genomic regions, with the disease gene locus highlighted in red and the magnified view focusing on the gene loci, are shown for *BMP2* (**A, B**), *GDF2* (**C, D**) and *TBX4* (**E, F**).

## Table legends

**Table 1.** Definitions of labels and the number of unrelated cases and controls for genetic association analysis with BeviMed. mPAP - mean pulmonary artery pressure, PH - pulmonary hypertension, PAH - pulmonary arterial hypertension, I/HPAH - Idiopathic/Hereditary Pulmonary Arterial Hypertension, PVOD - Pulmonary veno-occlusive disease, PCH - Pulmonary capillary haemangiomas, APAH - Associated Pulmonary Arterial Hypertension, CHD - Congenital Heart Disease, CTD - Connective Heart Disease, PPH, LHD - Left Heart Disease, LD - Lung Disease, CTEPH - Chronic Thromboembolic Pulmonary Hypertension, KCO - transfer coefficient of carbon monoxide.

**Table 2.** BeviMed analysis results. Posterior probabilities and Bayes factors of gene-tag associations. The "High" category, comprise only variants of "high" impact, including PTVs and large deletions; the Moderate category contains variants of impact "moderate", including missense variants or consequence "non\_coding\_transcript\_exon\_variant"; the combined category Moderate and High, include both respective consequence types.

**Table 3.** Gene changes for IPAH patients harbouring protein-truncating variants (PTV) in the *KDR* gene and PTV and missense variants in the *IDH3G* gene. *KDR* - Kinase insert domain receptor, *IDH3G* - Isocitrate dehydrogenase (NAD(+)) 3 non-catalytic subunit gamma, WHO FC - World Health Organisation functional class, 6MWD - 6-minute walk distance, SpO<sub>2</sub> - arterial oxygen saturation, mRAP - mean right atrial pressure, mPAP - mean pulmonary artery pressure, mPAWP - mean pulmonary artery wedge pressure, CO - cardiac output, PVR - pulmonary vascular resistance, FEV<sub>1</sub> - forced expiratory volume in 1 sec, FVC - forced vital capacity, KCO - transfer factor coefficient for carbon monoxide. None of the *KDR* variants has been previously

reported in gnomAD, ExAC or internal controls. For *KDR* HGVS notations are based on transcript sequence ENST00000263923.4. HGVS notations are based on amino acid sequence ENSP00000263923.4. None of the patients harbouring PTV in *KDR* had capillary hemangioma, \*DLCO% predicted; For *IDH3G* HGVS notations are based on transcript sequence ENST00000217901.5, HGVS notations are based on amino acid sequence ENSP00000217901.5. Protein truncating variants were defined as stop gained, splice acceptor variants or frameshift variants.

**Table 4.** Clinical characteristics of IPAH patients harbouring protein truncating variants in the *KDR* gene. *KDR* - Kinase insert domain receptor, IPAH - idiopathic pulmonary arterial hypertension, BMI - Body Mass Index, WHO FC - World Health Organisation functional class, 6MWD - six-minute walk distance, SpO<sub>2</sub> - arterial oxygen saturation, mRAP - mean right atrial pressure, mPAP - mean pulmonary artery pressure, PAWP - pulmonary artery wedge pressure, CO - cardiac output, PVR - pulmonary vascular resistance, NO - nitric oxide, FEV<sub>1</sub> - forced expiratory volume in 1 second, FVC - forced vital capacity, KCO - transfer factor coefficient for carbon monoxide, COPD - chronic obstructive pulmonary disease, CAD - coronary artery disease, HTN - systemic hypertension, CKD - chronic kidney disease, Hb - haemoglobin, WBC - white blood cells, TSH - thyroid-stimulating hormone. Comorbidities are reported as the number and percentage of cases possessing a disease entity. None of the patients had a history of pulmonary embolism or asthma. Three of the *KDR* missense variants co-occurred with predicted deleterious variants in established PAH risk genes (*BMPR2* and *AQP1*)

## Supplemental table legends

**Table S1.** NIHR BioResource - Rare Diseases domain definitions.

**Table S2.** Summary of electronic clinical report forms (CRFs) constructed to capture phenotypic information

**Table S3.** Reporting proforma for CT scan revision. CTPA - Computerised Tomography Pulmonary Angiogram, HRCT - High-Resolution Computerised Tomography, GGO - ground glass opacities

**Table S4.** Clinical characterisation of the study population. BMI - body mass index, WHO FC - World Health Organisation Functional Class, 6MWD - 6-minute walk distance, mRAP - mean right atrial pressure, mPAP - mean pulmonary artery pressure, CO - cardiac output, FEV<sub>1</sub> - forced expiratory capacity in 1 second, FVC - forced vital capacity, KCO - transfer factor coefficient for carbon monoxide, Hb - haemoglobin, RDW - red cell distribution width, WBC - white blood cell count, NTproBNP - N-terminal pro b-type natriuretic peptide, BNP - B-type natriuretic peptide, CRP - C-Reactive Protein Protein, HTN - hypertension, DM - diabetes mellitus, CAD - coronary artery disease, CVA - cerebrovascular accident, COPD - chronic obstructive pulmonary disease, CCB - calcium channel blocker, ERA - endothelin receptor antagonists, PA - prostacyclin analogues, PED5 - phosphodiesterase type 5, sGC - soluble guanylate cyclase; Entire cohort (n=1122) was composed of IPAH (n=972), HPAH (n=73), PVOD/PCH (n=20), PH associated with left heart disease (n=7), PH associated with lung disease (n=8), chronic thromboembolic pulmonary hypertension (n=6), multifactorial PH (n=6), hereditary hemorrhagic telangiectasia (n=1)



**Table S5.** Clinical differences between patients with present and missing transfer coefficient results. BMI - body mass index, WHO FC - World Health Organisation Functional Class, 6MWD - 6-minute walk distance, mRAP - mean right atrial pressure, mPAP - mean pulmonary artery pressure, PAWP - Pulmonary Artery Wedge Pressure, CI - cardiac index, PVR - pulmonary vascular resistance, SvO<sub>2</sub> [%] - mixed venous saturation, HRCT - High-Resolution Computerised Tomography, FEV<sub>1</sub> - forced expiratory capacity in 1 second, FVC - forced vital capacity, COPD - chronic obstructive pulmonary disease, OSA - obstructive sleep apnoea

**Table S6.** Clinical characteristics of unrelated individuals used in gene-tag association analysis by KCO threshold. BMI - body mass index, WHO FC - World Health Organisation Functional Class, 6MWD - 6-minute walk distance, SpO<sub>2</sub> - peripheral capillary oxygen saturation, mRAP - mean right atrial pressure, mPAP - mean pulmonary artery pressure, PAWP - Pulmonary Artery Wedge Pressure, CO - cardiac output, SvO<sub>2</sub> - Mixed venous oxygen saturation, FEV<sub>1</sub> - forced expiratory capacity in 1 second, FVC - forced vital capacity, TLC - Total Lung Capacity, KCO - transfer coefficient of carbon monoxide, HRCT - High-Resolution Computerised Tomography, NTproBNP - N-terminal pro B-Type Natriuretic Peptide, BNP - B-Type Natriuretic Peptide, CRP - C-Reactive Protein Protein, Hb - haemoglobin, WBC - white blood cell count, COPD - chronic obstructive pulmonary disease, OSA - obstructive sleep apnoea, CAD - coronary artery disease, CVA - cerebrovascular accident, PAD - peripheral artery disease, HTN - hypertension, DM - diabetes mellitus; none of the patients had systemic lupus erythematosus, systemic sclerosis, undifferentiated connective tissue disease or ankylosing spondylitis

**Table S7.** Clinical characteristics of unrelated individuals used in gene-tag association analysis by KCO tertiles. BMI - body mass index, WHO FC - World Health Organisation Functional Class,

6MWD - 6-minute walk distance, SpO<sub>2</sub> - peripheral capillary oxygen saturation, mRAP - mean right atrial pressure, mPAP - mean pulmonary artery pressure, PAWP - Pulmonary Artery Wedge Pressure, CO - cardiac output, SvO<sub>2</sub> - mixed venous oxygen saturation, NO - nitric oxide, FEV<sub>1</sub> - forced expiratory capacity in 1 second, FVC - forced vital capacity, TLC - Total Lung Capacity, KCO - transfer coefficient of carbon monoxide, HRCT - High-Resolution Computerised Tomography, NTproBNP - N-terminal pro b-type natriuretic peptide, BNP - B-type natriuretic peptide, CRP - C-Reactive Protein Protein, Hb - haemoglobin, WBC - white blood cell count, COPD - chronic obstructive pulmonary disease, OSA - obstructive sleep apnoea, CAD - coronary artery disease, CVA - cerebrovascular accident, PAD - peripheral artery disease, HTN - hypertension, DM - diabetes mellitus; none of the patients had systemic lupus erythematosus, systemic sclerosis, undifferentiated connective tissue disease or ankylosing spondylitis

**Table S8.** Result of Cox regression analysis relating overall survival to selected variables at baseline. CI - Confidence interval, 6MWD - 6-minute walking distance, mPAP - mean pulmonary arterial pressure, mRAP - mean right atrial pressure, PVR - pulmonary vascular resistance, WU - Wood units, KCO - transfer coefficient of carbon monoxide, CAD - coronary artery disease, COPD - chronic obstructive pulmonary disease, HTN - systemic hypertension, HRCT - High-Resolution Computerised Tomography

**Table S9.** Clinical characteristics of unrelated individuals used in gene-tag association by age tertiles. BMI - body mass index, WHO FC - World Health Organisation Functional Class, 6MWD - 6-minute walk distance, SpO<sub>2</sub> - peripheral capillary oxygen saturation, mRAP - mean right atrial pressure, mPAP - mean pulmonary artery pressure, PAWP - Pulmonary Artery Wedge Pressure, CO - cardiac output, SvO<sub>2</sub> - Mixed venous oxygen saturation, NO - nitric oxide, FEV<sub>1</sub> - forced expiratory capacity in 1 second, FVC - forced vital capacity, TLC - Total Lung Capacity, KCO -

transfer factor coefficient for carbon monoxide, NTproBNP - N-terminal pro b-type natriuretic peptide, BNP - B-type natriuretic peptide, CRP - C-Reactive Protein Protein, Hb - haemoglobin, WBC - white blood cell count, COPD - chronic obstructive pulmonary disease, OSA - obstructive sleep apnoea, CAD - coronary artery disease, CVA - cerebrovascular accident, PAD - peripheral artery disease, HTN - hypertension, DM - diabetes mellitus; none of the patients had undifferentiated connective tissue disease, incident cases were defined as those diagnosed within 6 months from study commencement.

**Table S10.** Summary of imaging analysis. IPAH - idiopathic pulmonary arterial hypertension, HPAH - hereditary pulmonary arterial hypertension, PVOD - pulmonary veno-occlusive disease, PCH - Pulmonary capillary haemangiomatosis, GGO - ground glass opacities, BA - bronchial artery, C - central, U - upper, Z - zonal, D - diffuse; Intra-rater reliability: GGO centrilobular pattern severity weighted Cohen's Kappa=0.679, p-value <0.001; GGO distribution unweighted Cohen's Kappa = 1, p-value 0.046; Severity of GGO non-specific pattern - no positive findings; Pulmonary arteriovenous malformations - no positive findings; largest BA size - no positive findings; Mediastinal venous collaterals: unweighted Cohen's Kappa = 1, p-value <0.001; Intralobular septal thickening weighted Cohen's Kappa = 1, p-value <0.001; Mediastinal lymphadenopathy unweighted Cohen's Kappa=0.83, p-value <0.001; Mediastinal lymphadenopathy size [mm] intraclass correlation coefficient (ICC) 0.717, p-value 0.088; Emphysema - not enough positive findings, Bronchial wall thickening - not enough positive findings, Fibrosis - no positive findings; Pleural effusion weighted Cohen's Kappa 0.826, p-value <0.001; Air trapping weighted Cohen's Kappa 0.845, p-value <0.001; Subpleural scarring - not enough positive findings.

**Table S11.** Clinical characteristics of IPAH patients who harbour protein-truncating variants in *BMPR2*, *EIF2AK4*, *KDR* and *IDH3G*. BMI - body mass index, WHO FC - World Health Organisation functional class, 6MWD - 6-minute walk distance, SpO<sub>2</sub> - arterial oxygen saturation, mRAP - mean right atrial pressure, mPAP - mean pulmonary artery pressure, mPAWP - mean pulmonary artery wedge pressure, CO - cardiac output, PVR - pulmonary vascular resistance, NO - nitric oxide challenge, FEV<sub>1</sub> - forced expiratory volume in 1 second, FVC - forced vital capacity, KCO - transfer factor coefficient for carbon monoxide, COPD - chronic obstructive pulmonary disease, OSA - obstructive sleep apnea, CAD - coronary artery disease, HTN - systemic hypertension, CKD - chronic kidney disease, Hb - haemoglobin, WBC - white blood cells, TSH - thyroid-stimulating hormone. Comorbidities are reported as the number and percentage of cases possessing a disease entity.

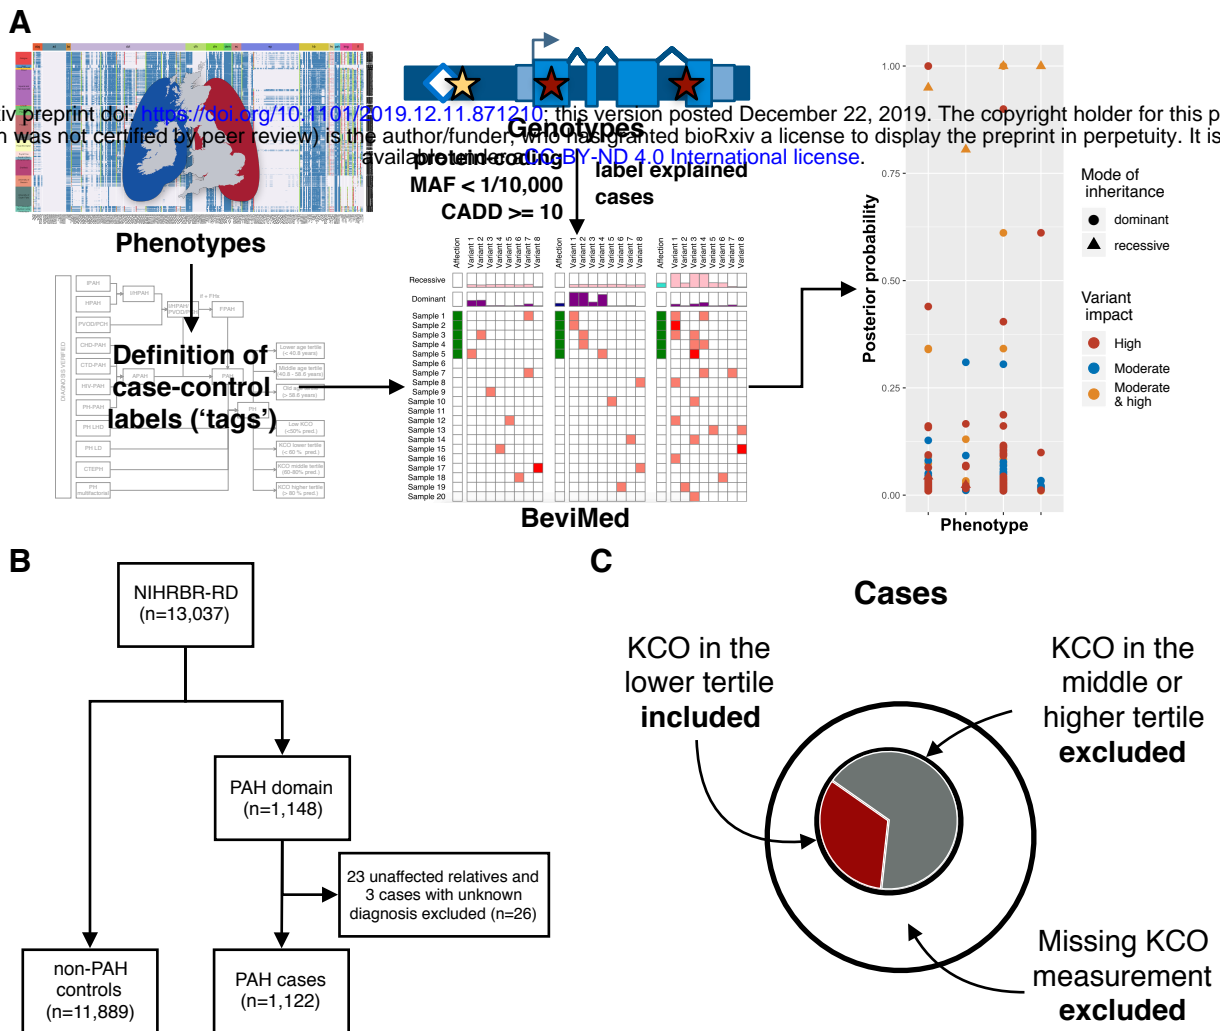

**Figure 1. Design of the genetic association study.** **A**, Overview of the analytical approach. Using deep phenotyping, data tags were assigned to patients who shared phenotypic features (see Figure S1 for more details). Rare sequence variants, called from whole-genome sequencing data, were filtered and explained cases were labelled. BeviMed was applied to a set of unrelated individuals, to test the posterior probability of gene-tag associations. **B**, Consort diagram summarising the size of the study cohort. **C**, Schematic representation of the definition of cases, exemplified by the KCO lower tertile tag. Cases were defined as individuals carrying a particular tag, whereas patients with missing information or those without a tag were removed from the gene-tag association testing. Individuals from non-PAH domains served as controls. KCO - transfer coefficient of carbon monoxide, MAF - minor allele frequency.

**A**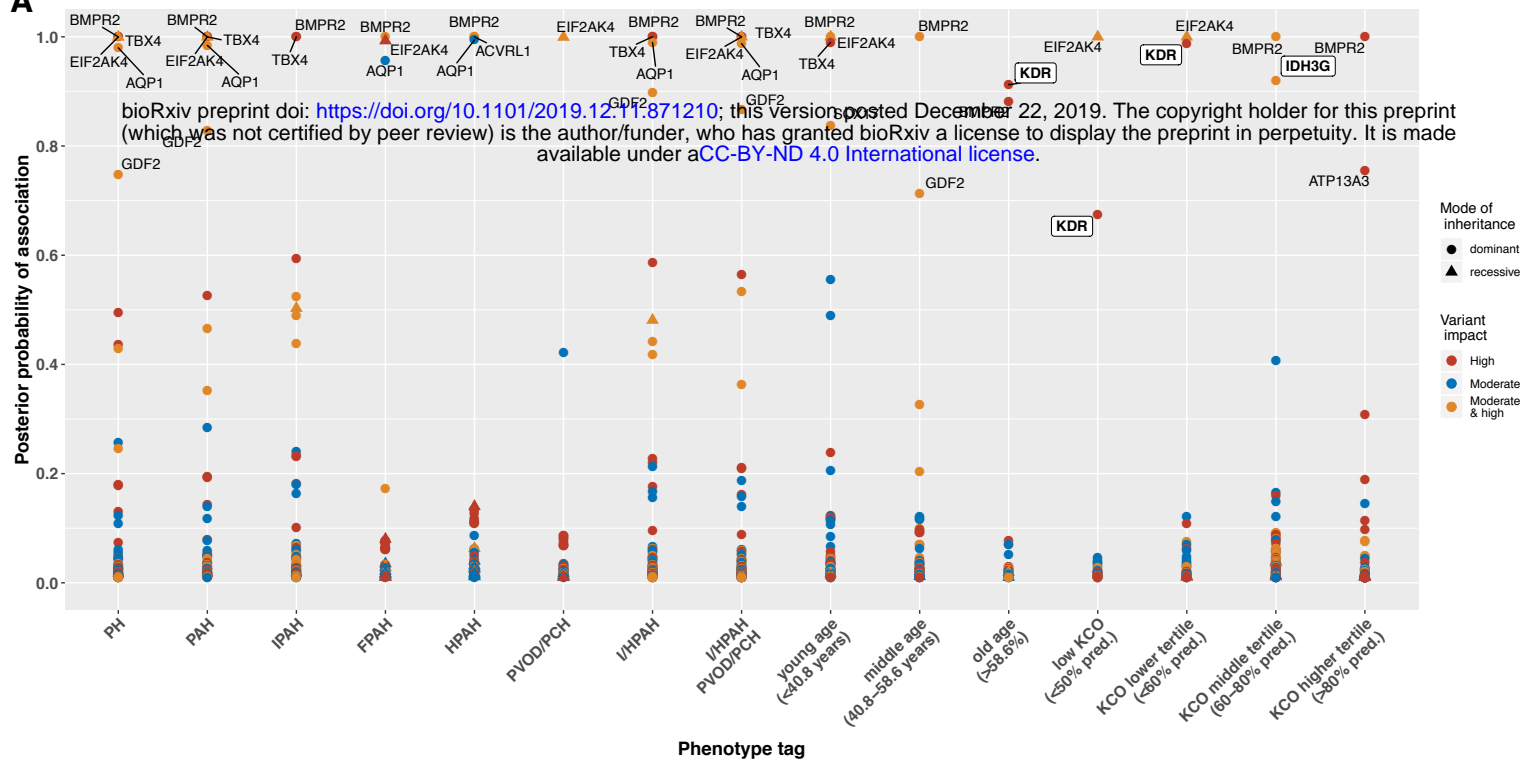**B**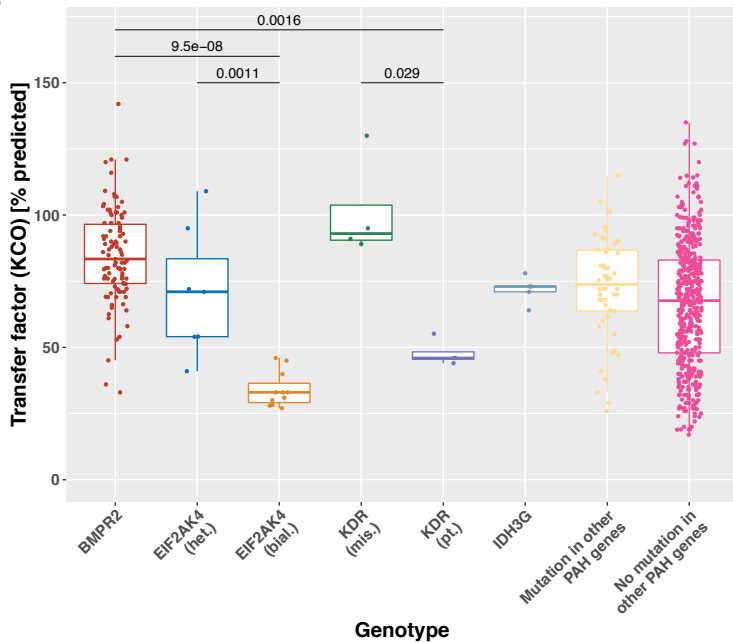**C**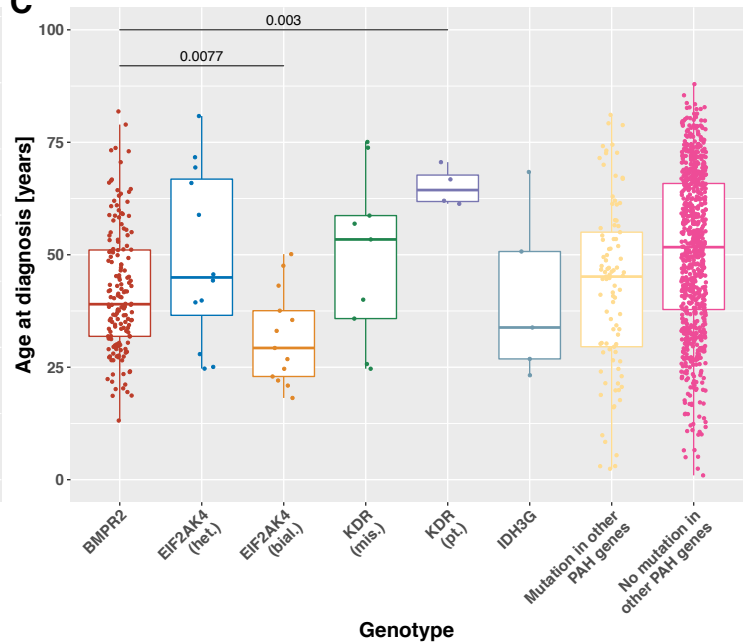

**Figure 2. Genetic association study results revealing established and novel genotype-phenotype links.** **A**, Figure showing phenotype tags on the x-axis and their corresponding posterior probability on the y-axis, as calculated by BeviMed. This measure predicts associations between tags and rare, predicted deleterious variants within a given gene. The definitions of the tags are listed in Table 1. Shape and colour of points indicate the mode of inheritance and consequence type/impact of variants driving the association. Box-and-whisker plots showing the distribution of transfer coefficient of carbon monoxide (**B**) and age at diagnosis (**C**) stratified by genotype across the PAH domain. The two-tailed Wilcoxon signed-rank test was used to determine differences in the medians of the distributions, which are indicated by the bars at the top of the figures providing the respective p-values. bial. - biallelic, het. - heterozygous, pt. - protein-truncating, mis. - missense.

**A**

**KDR SNVs and indels**

NIHRBR-RD PAH cases (bioRxiv preprint doi: <https://doi.org/10.1101/2019.12.11.871210>; this version posted December 22, 2019. The copyright holder for this preprint (which was not certified by peer review) is the author/funder, who has granted bioRxiv a license to display the preprint in perpetuity. It is made available under aCC-BY-ND 4.0 International license.

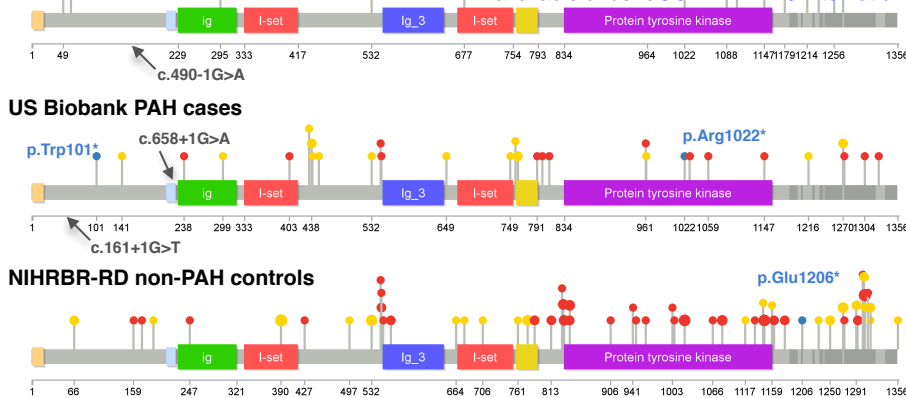

- Consequence type**
- Stop gained
  - Frameshift
  - Inframe insertion/deletion
  - Missense (deleterious)
  - Missense (uncertain)

| KDR                     | NIHRBR-RD |          | USBB  |
|-------------------------|-----------|----------|-------|
|                         | Cases     | Controls | Cases |
| frameshift_variant      | 1         | 0        | 0     |
| missense_variant        | 13        | 102      | 31    |
| splice_acceptor_variant | 1         | 0        | 0     |
| splice_donor_variant    | 0         | 0        | 2     |
| stop_gained             | 2         | 1        | 2     |

**B**

**IDH3G SNVs and indels**

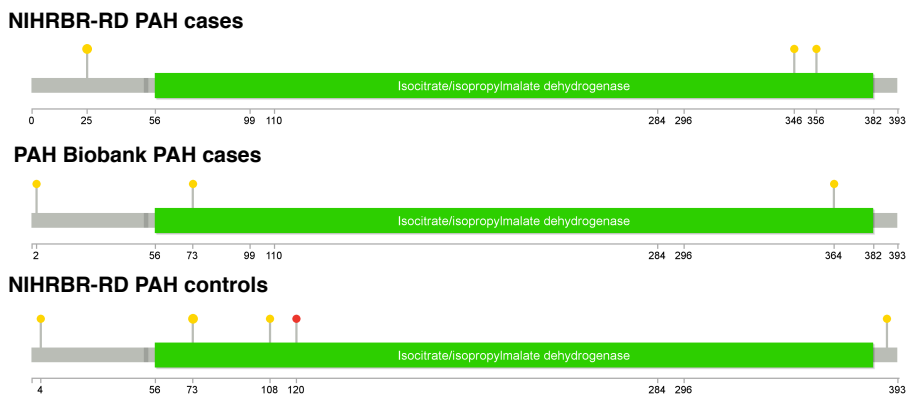

| IDH3G            | NIHRBR-RD |          | USBB  |
|------------------|-----------|----------|-------|
|                  | Cases     | Controls | Cases |
| large_deletion   | 1         | 2        | 0     |
| missense_variant | 4         | 6        | 3     |

**C**

**IDH3G large deletion**

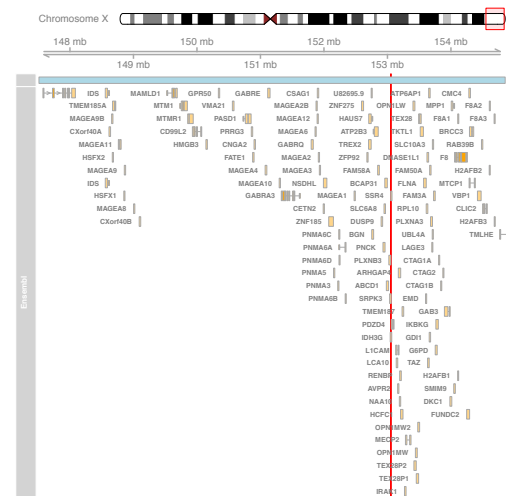

**Figure 3. Summary of single nucleotide variants (SNVs), small insertions and deletions (indels) and large deletions identified in the two novel candidate PAH disease risk genes.** Only predicted deleterious variants in *KDR* (A) and *IDH3G* (B, C) are shown (MAF<1/10,000 and CADD>=15). SNVs and indels are represented by coloured lollipops on top of the protein sequence. Lollipop colour indicates the consequence type and size represents the variant frequency within a cohort. The domain annotations were retrieved from Uniprot (accession numbers P35968 [*KDR* (A)] and P51553 [*IDH3G* (D)]). PTVs are labelled with the respective HGVS notation. Splice variants are marked by dark grey arrows. The large deletion identified in *IDH3G* (C) is depicted in light blue; the respective gene locus is highlighted in red. The number of variants by predicted consequence type and cohort is provided in the tables.

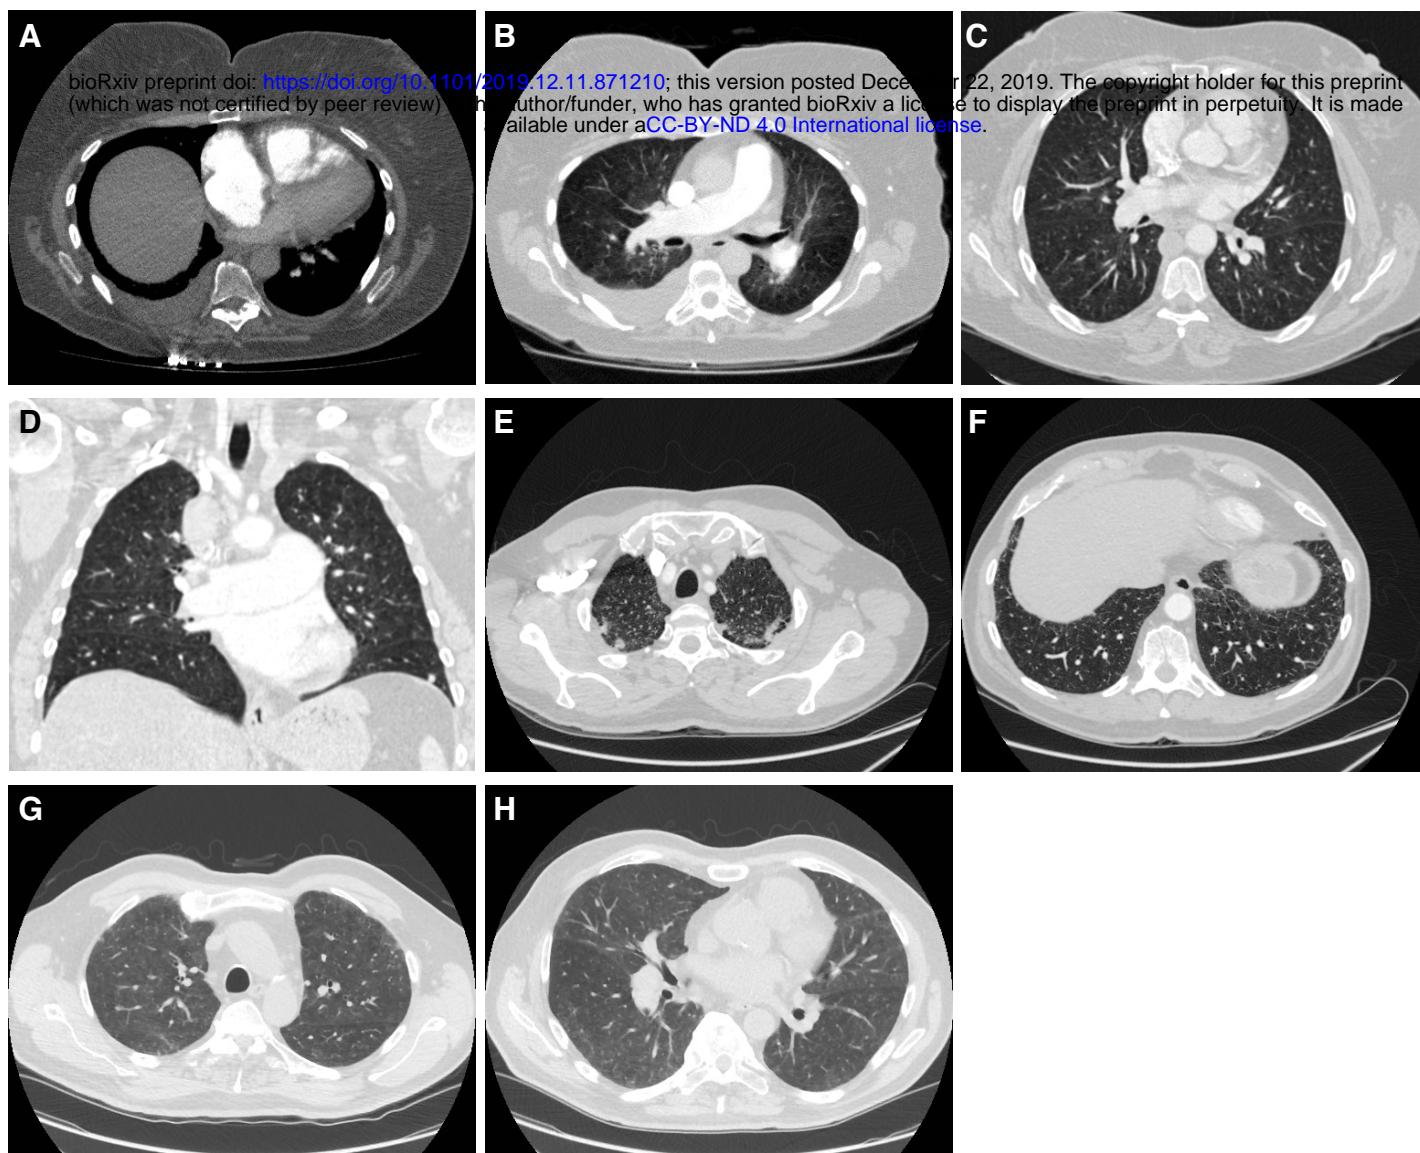

**Figure 4. Pulmonary computerised tomography (CT) scans of patients carrying protein-truncating *KDR* mutations.** **A**, Axial image of pulmonary CT angiogram at the level of the right ventricle (RV) moderator band, showing flattening of intraventricular septum, leftwards bowing of the interatrial septum and the enlargement of the right atrium (RA) and RV, indicative of RV strain; bilateral pleural effusion, larger on the right side. **B**, Axial image of a pulmonary CT angiogram demonstrating enlarged pulmonary artery and mild central lung ground glass opacity (GGO). **C**, Axial high-resolution CT slice of the chest in the lung window showing a trace of non-specific GGO with a central distribution. **D**, Coronal image showing the trace of central GGO and enlarged central pulmonary arteries. Axial high-resolution CT slice of the chest in the lung window showing apical subpleural fibrosis (**E**), and very minor subpleural fibrosis at the lung bases (**F**). Axial high-resolution CT slice of the chest in the lung window showing subpleural GGO at apical level (**G**), and mild GGO at mid-thoracic level (**H**). Patients: E001392 (**A**, **B**), E003448 (**C**, **D**), W000229 (**E**, **F**), W000274 (**G** and **H**).



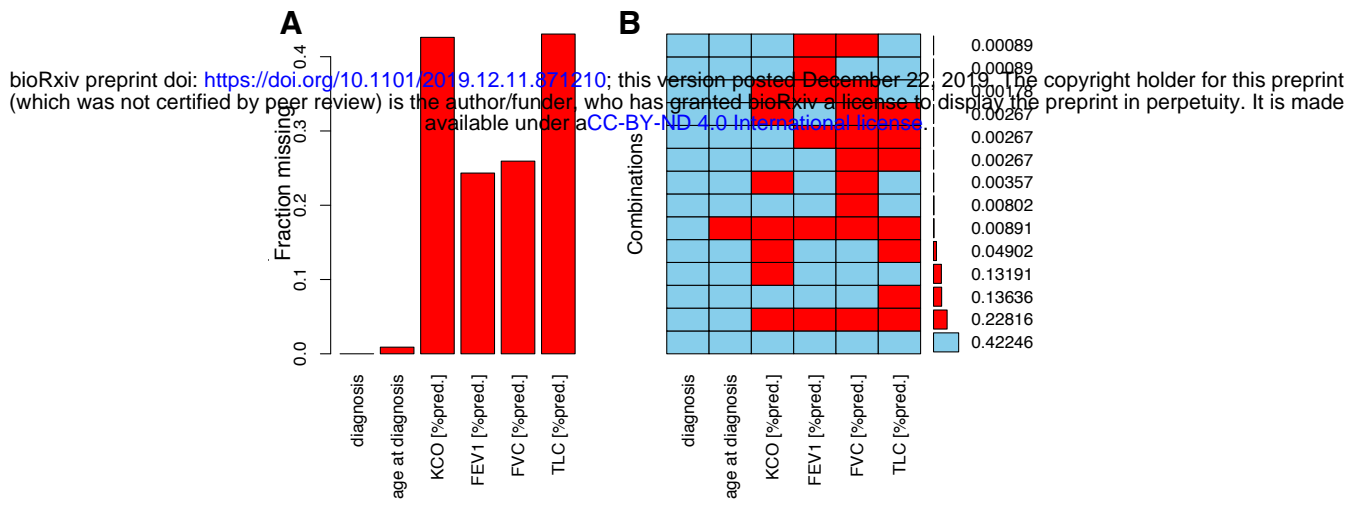

**Figure S1. Summary of missing data.** **A**, The fraction of missing data for KCO, in comparison to diagnosis, age at diagnosis and lung function tests. **B**, The missingness pattern in KCO, in relation to diagnosis, age at diagnosis and lung function tests. KCO - transfer coefficient of carbon monoxide. FEV<sub>1</sub> - forced expiratory volume in 1 second, FVC - forced vital capacity, TLC - total lung capacity.

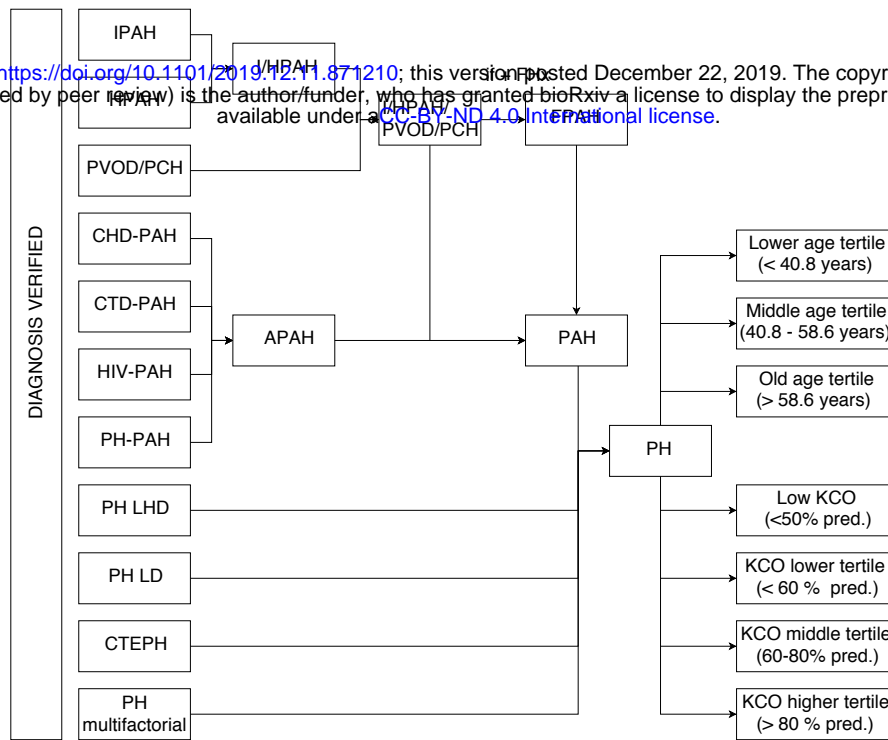

**Figure S2. Flowchart describing the definition of diagnostic and phenotypic tags.** A detailed description is provided in the supplemental material. The definition of tags is listed in Table 1.

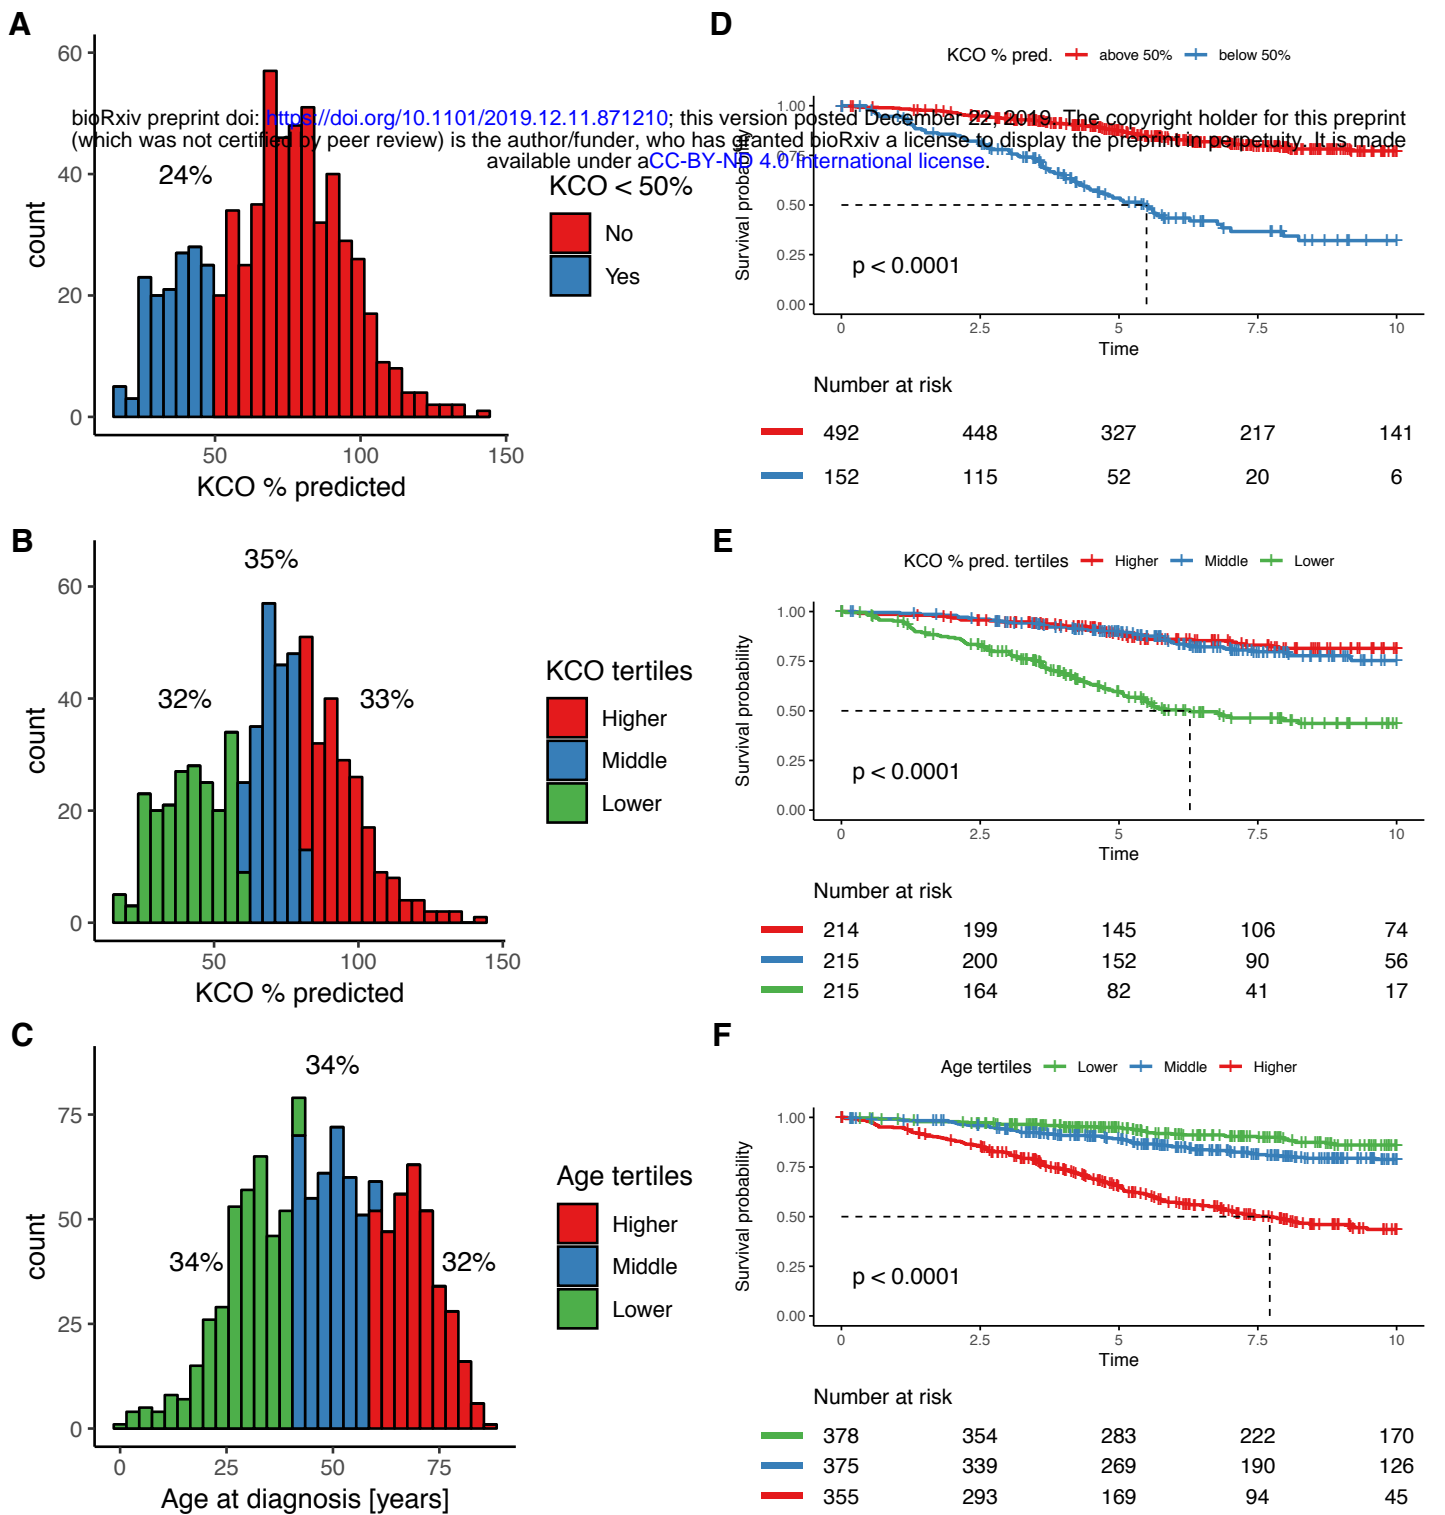

**Figure S3. Characterisation and survival analysis of the cohort.** Distribution of transfer coefficient of carbon monoxide (KCO), coloured by KCO tertiles (**A**), and coloured by KCO below and above the 50% predicted threshold (**B**). **C**, Distribution of age tertiles. **D**, Kaplan-Meier survival curves for KCO tertiles. **E**, Kaplan-Meier survival curves for KCO below and above 50% predicted threshold. **F**, Kaplan-Meier survival curves for age tertiles.

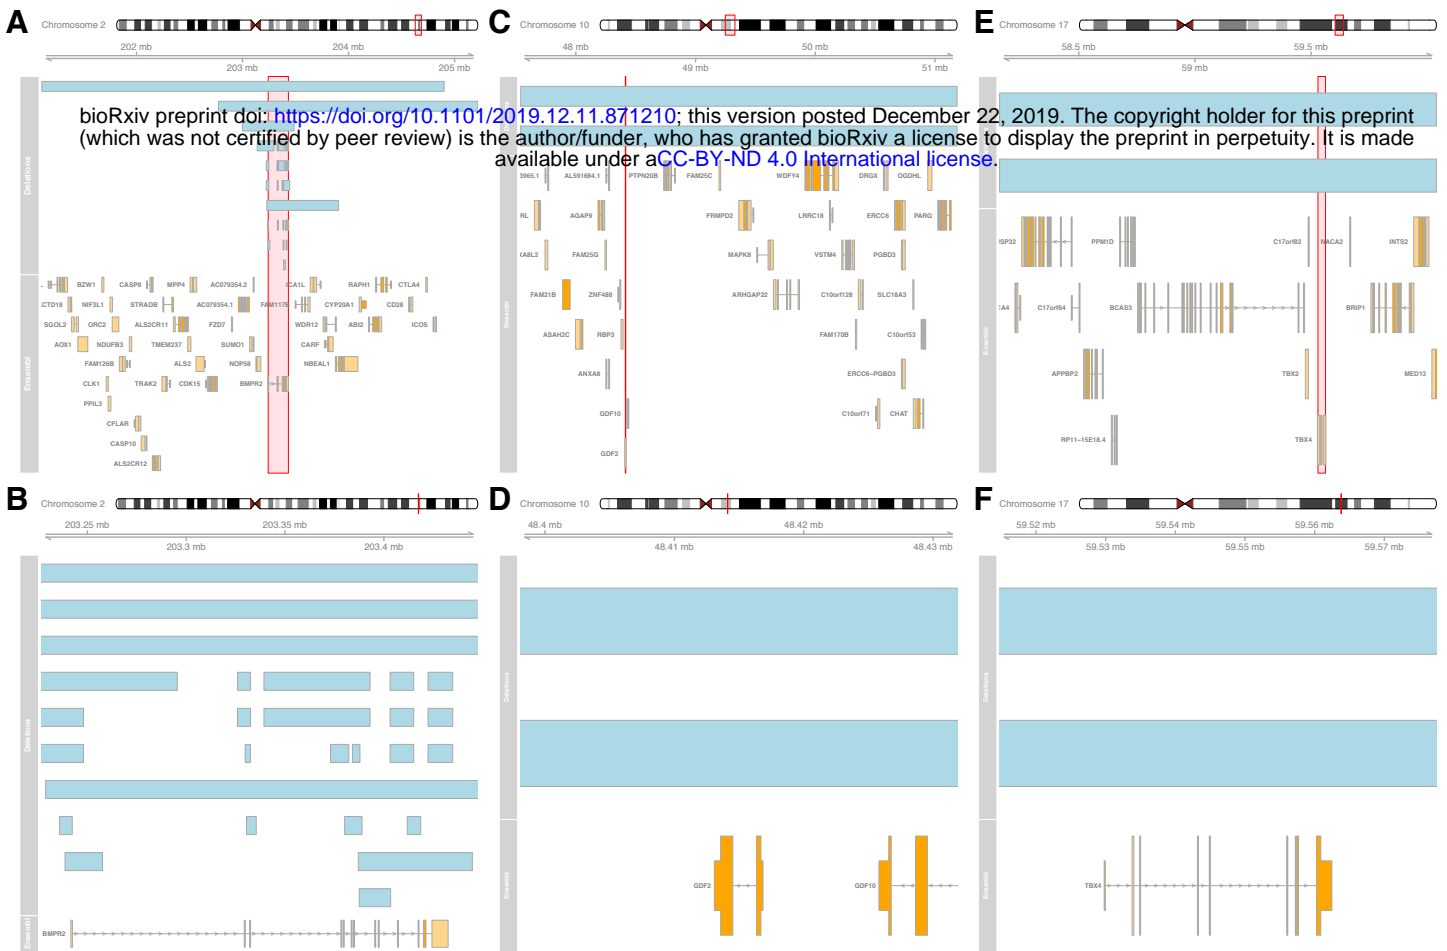

**Figure S4. Summary of large deletions identified in previously established disease genes.** Deletions are indicated by light blue boxes. The protein-coding genes, annotated in the displayed region by Ensembl (GRCh37, version 75), are depicted in the bottom panels. The affected genomic regions, with the disease gene locus highlighted in red and the magnified view focusing on the gene loci, are shown for *BMP2* (A, B), *GDF2* (C, D) and *TBX4* (E, F).

Table 1. Definition of labels and their relation to cases and controls. This version posted December 22, 2019. The copyright holder for this preprint (which was not certified by peer review) is the author/funder, who has granted bioRxiv a license to display the preprint in perpetuity. It is made available under aCC-BY-ND 4.0 International license.

| Tag                | Tag description                                                                                                             | Cases | Controls | Excluded relatives |
|--------------------|-----------------------------------------------------------------------------------------------------------------------------|-------|----------|--------------------|
| PH                 | Individuals with mPAP > 25 mmHg                                                                                             | 1112  | 9134     | 2786               |
| PAH                | Patients with one of the following diagnoses: IPAH, HPAH, PVOD, PCH, APAH: CHD-PAH, APAH:CTD-PAH, APAH:HIV-PAH, APAH:PH-PAH | 1085  | 9134     | 2786               |
| I/HPAH             | Patients with a clinical diagnosis of IPAH or HPAH                                                                          | 1036  | 9134     | 2786               |
| IPAH               | Patients with a clinical diagnosis of IPAH                                                                                  | 972   | 9134     | 2785               |
| HPAH               | Patients with a clinical diagnosis of HPAH                                                                                  | 67    | 9136     | 2779               |
| PVOD/PCH           | Patients with a clinical diagnosis of PVOD/PCH                                                                              | 20    | 9136     | 2778               |
| I/HPAH/PVOD/PCH    | Patients with one of the following diagnoses: IPAH, HPAH, PVOD, PCH                                                         | 1056  | 9134     | 2786               |
| FPAH               | Patients with one of the following diagnoses: IPAH, HPAH, PVOD, PCH and a positive family history                           | 80    | 9136     | 2781               |
| APAH               | Patients with one of the following diagnoses: APAH:CHD_PAH, APAH:CTD-PAH,                                                   | 29    | 9136     | 2778               |
| APAH: CHD-PAH      | Patients with PAH associated with congenital heart disease                                                                  | 17    | 9136     | 2778               |
| APAH: CTD-PAH      | Patients with PAH associated with connective tissue disease                                                                 | 10    | 9136     | 2778               |
| APAH: PoPH         | Patients with PAH associated with portopulmonary hypertension                                                               | 1     | 9136     | 2778               |
| APAH: HIV-PAH      | Patients with PAH associated with HIV                                                                                       | 1     | 9136     | 2778               |
| PH-LHD             | Patients with pulmonary hypertension associated with left heart disease (Group 2)                                           | 7     | 9136     | 2778               |
| PH-LD              | Patients with pulmonary hypertension associated with lung disease (Group 3)                                                 | 8     | 9136     | 2778               |
| CTEPH              | Chronic thromboembolic pulmonary hypertension (Group 4)                                                                     | 6     | 9136     | 2778               |
| PH-multifactorial  | Multifactorial pulmonary hypertension (Group 5)                                                                             | 6     | 9136     | 2778               |
| young age          | Lower age tertile (<40.8 years)                                                                                             | 378   | 9136     | 2785               |
| middle age         | Middle age tertile (40.8 - 58.6 years)                                                                                      | 376   | 9134     | 2779               |
| old age            | Higher age tertile (>58.6 years)                                                                                            | 355   | 9136     | 2778               |
| low KCO            | KCO < 50% pred.                                                                                                             | 152   | 9136     | 2778               |
| KCO lower tertile  | KCO <60% pred.                                                                                                              | 211   | 9136     | 2778               |
| KCO middle tertile | KCO 60-80% pred.                                                                                                            | 215   | 9136     | 2778               |
| KCO higher tertile | KCO >80% pred.                                                                                                              | 215   | 9134     | 2779               |

bioRxiv preprint doi: <https://doi.org/10.1101/2019.12.11.871210>; this version posted December 22, 2019. The copyright holder for this preprint (which was not certified by peer review) is the author/funder, who has granted bioRxiv a license to display the preprint in perpetuity. It is made available under aCC-BY 4.0 International license.

**Table 2:** BeviMed analysis results. Posterior probabilities and Bayes factors of gene-tag associations. The "High" category, comprise only variants of impact "high", including indels and large deletions; the Moderate category contains variants of impact "moderate", including missense variants or consequence "non\_coding\_transcript\_exon\_variant"; the combined category Moderate and High, include both respective consequence types.

| Gene           | Transcript      | Tag                | Log Bayes factor | Posterior probability | Consequence type  | Mode of inheritance |
|----------------|-----------------|--------------------|------------------|-----------------------|-------------------|---------------------|
| <i>BMP2R</i>   | ENST00000374580 | I/HPAH             | 265.762          | 1.000                 | High              | dominant            |
| <i>BMP2R</i>   | ENST00000374580 | PAH                | 265.639          | 1.000                 | High              | dominant            |
| <i>BMP2R</i>   | ENST00000374580 | I/HPAH/PVOD/PCH    | 263.481          | 1.000                 | High              | dominant            |
| <i>BMP2R</i>   | ENST00000374580 | young age          | 149.576          | 1.000                 | Moderate and high | dominant            |
| <i>BMP2R</i>   | ENST00000374580 | HPAH               | 149.091          | 1.000                 | Moderate and high | dominant            |
| <i>BMP2R</i>   | ENST00000374580 | FPAH               | 147.822          | 1.000                 | Moderate and high | dominant            |
| <i>BMP2R</i>   | ENST00000374580 | IPAH               | 144.582          | 1.000                 | High              | dominant            |
| <i>BMP2R</i>   | ENST00000374580 | KCO higher tertile | 99.923           | 1.000                 | High              | dominant            |
| <i>BMP2R</i>   | ENST00000374580 | middle age         | 63.119           | 1.000                 | Moderate and high | dominant            |
| <i>BMP2R</i>   | ENST00000374580 | KCO middle tertile | 52.706           | 1.000                 | Moderate and high | dominant            |
| <i>EIF2AK4</i> | ENST00000263791 | low KCO            | 29.741           | 1.000                 | Moderate and high | recessive           |
| <i>EIF2AK4</i> | ENST00000263791 | KCO lower tertile  | 26.247           | 1.000                 | Moderate and high | recessive           |
| <i>TBX4</i>    | ENST00000240335 | I/HPAH             | 23.783           | 1.000                 | High              | dominant            |
| <i>TBX4</i>    | ENST00000240335 | I/HPAH/PVOD/PCH    | 23.549           | 1.000                 | High              | dominant            |
| <i>TBX4</i>    | ENST00000240335 | PAH                | 23.141           | 1.000                 | High              | dominant            |
| <i>EIF2AK4</i> | ENST00000263791 | young age          | 20.547           | 1.000                 | Moderate and high | recessive           |
| <i>TBX4</i>    | ENST00000240335 | IPAH               | 19.990           | 1.000                 | High              | dominant            |
| <i>EIF2AK4</i> | ENST00000263791 | I/HPAH/PVOD/PCH    | 15.718           | 1.000                 | Moderate and high | recessive           |
| <i>ACVRL1</i>  | ENST00000388922 | HPAH               | 15.501           | 1.000                 | Moderate and high | dominant            |
| <i>EIF2AK4</i> | ENST00000263791 | PAH                | 15.407           | 1.000                 | Moderate and high | recessive           |
| <i>EIF2AK4</i> | ENST00000263791 | PVOD/PCH           | 14.441           | 0.999                 | Moderate and high | recessive           |
| <i>AQP1</i>    | ENST00000311813 | HPAH               | 12.075           | 0.994                 | Moderate          | dominant            |
| <i>EIF2AK4</i> | ENST00000263791 | FPAH               | 11.858           | 0.993                 | High              | recessive           |
| <i>TBX4</i>    | ENST00000240335 | young age          | 11.500           | 0.990                 | High              | dominant            |
| <i>AQP1</i>    | ENST00000311813 | I/HPAH             | 11.466           | 0.990                 | Moderate and high | dominant            |
| <i>KDR</i>     | ENST00000263923 | KCO lower tertile  | 11.362           | 0.989                 | High              | dominant            |
| <i>AQP1</i>    | ENST00000311813 | I/HPAH/PVOD/PCH    | 11.291           | 0.988                 | Moderate and high | dominant            |
| <i>AQP1</i>    | ENST00000311813 | PAH                | 11.047           | 0.984                 | Moderate and high | dominant            |
| <i>AQP1</i>    | ENST00000311813 | FPAH               | 10.023           | 0.958                 | Moderate          | dominant            |
| <i>IDH3G</i>   | ENST00000217901 | KCO middle tertile | 9.346            | 0.920                 | Moderate and high | dominant            |
| <i>KDR</i>     | ENST00000263923 | old age            | 9.249            | 0.912                 | High              | dominant            |
| <i>GDF2</i>    | ENST00000249598 | I/HPAH             | 9.091            | 0.899                 | Moderate and high | dominant            |
| <i>BMP2R</i>   | ENST00000374580 | old age            | 8.913            | 0.881                 | High              | dominant            |
| <i>GDF2</i>    | ENST00000249598 | I/HPAH/PVOD/PCH    | 8.775            | 0.866                 | Moderate and high | dominant            |
| <i>SOX17</i>   | ENST00000297316 | young age          | 8.554            | 0.839                 | Moderate and high | dominant            |
| <i>GDF2</i>    | ENST00000249598 | PAH                | 8.478            | 0.828                 | Moderate and high | dominant            |
| <i>ATP13A3</i> | ENST00000439040 | KCO higher tertile | 8.035            | 0.755                 | High              | dominant            |
| <i>GDF2</i>    | ENST00000249598 | middle age         | 7.818            | 0.713                 | Moderate and high | dominant            |
| <i>KDR</i>     | ENST00000263923 | low KCO            | 7.636            | 0.675                 | High              | dominant            |

**Table 3.** Gene changes for IPAH patients harbouring protein-truncating variants (PTV) in the *KDR* gene and PTV and missense variants in the *IDH3G* gene. *KDR* - Kinase insert domain receptor, *IDH3G* - Isocitrate dehydrogenase (NAD(+)) 3 non-catalytic subunit gamma, WHO FC - World Health Organisation functional class, 6MWD - 6-minute walk distance, SpO<sub>2</sub> - arterial oxygen saturation, mRAP - mean right atrial pressure, mPAP - mean pulmonary artery pressure, mPAWP - mean pulmonary artery wedge pressure, CO - cardiac output, PVR - pulmonary vascular resistance, FEV<sub>1</sub> - forced expiratory volume in 1 sec, FVC - forced vital capacity, KCO - transfer factor coefficient for carbon monoxide. None of the *KDR* variants has been previously reported in gnomAD, ExAC or internal controls. For *KDR* HGVS notations are based on transcript sequence ENST00000263923.4. HGVS notations are based on amino acid sequence ENSP00000263923.4. None of the patients harbouring PTV in *KDR* had capillary hemangioma. \*DLC0% predicted; For *IDH3G* HGVS notations are based on transcript sequence ENST00000217901.5, HGVS notations are based on amino acid sequence ENSP00000217901.5. Protein truncating variants were defined as stop gained, splice acceptor variants or frameshift variants.

| Gene                       | <i>KDR</i>                     |                         |              |                    |                                        |                      |                         |                                         | <i>IDH3G</i>   |                  |                  |                  |                  |                                                                         |                  |  |
|----------------------------|--------------------------------|-------------------------|--------------|--------------------|----------------------------------------|----------------------|-------------------------|-----------------------------------------|----------------|------------------|------------------|------------------|------------------|-------------------------------------------------------------------------|------------------|--|
|                            | UK                             |                         |              |                    | US                                     |                      |                         |                                         | UK             |                  |                  |                  | US               |                                                                         |                  |  |
| Cohort                     | UK                             |                         |              |                    | US                                     |                      |                         |                                         | UK             |                  |                  |                  | US               |                                                                         |                  |  |
| WGS ID                     | W000229                        | E003448                 | W000274      | E001392            | CUMC-JM161                             | CCHMC12-190          | CCHMC-19-023            | CCHMC-27-015                            | E004190        | E004149          | E004194          | E001063          | W000031          | CCHMC_22-105                                                            | CCHMC_10-074     |  |
| Exon                       | 3                              | 22                      | 3            | 2                  | 3                                      | 5                    | 22                      | 1-13                                    | 1              | 1                | 12               | 12               | 13               | 13                                                                      | 4                |  |
| HGVSc                      | c.183G>A                       | c.490-1G>A              | c.3064C>T    | c.183del           | c.161+1G>T                             | c.303C>A             | c.658+1G>A              | c.3064C>T                               |                | c.1067T>C        | c.1037C>T        | c.74C>T          | c.74C>T          | c.1091C>T                                                               | c.217G>C         |  |
| HGVSp                      | p.Trp61Ter                     | -                       | p.Arg1022Ter | p.Trp61CysfsTer16  |                                        | p.Tyr101Ter          |                         | p.Arg1022Ter                            |                | p.Met356Thr      | p.Thr346Ile      | p.Pro25Leu       | p.Pro25Leu       | p.Pro364Leu                                                             | p.Val73Leu       |  |
| Consequence type           | stop gained                    | splice acceptor variant | stop gained  | frameshift variant | splice donor variant                   | stop gained          | stop gained             | stop gained                             | large deletion | missense variant | missense variant | missense variant | missense variant | missense variant                                                        | missense variant |  |
| Shared                     | PAH(1)                         | PAH(1)                  | PAH(1)       | PAH(1)             | No                                     | No                   | No                      | No                                      | GEL(1); PAH(1) | PAH(1)           | PAH(1)           | PAH(2)           | PAH(2)           | NA                                                                      | NA               |  |
| gnomAD                     | NA                             | NA                      | NA           | NA                 | NA                                     | NA                   | NA                      | NA                                      | NA             | NA               | NA               | NA               | NA               | 5.47E-06                                                                | 1.09E-05         |  |
| CADD_PHRD_v1.4             | 40                             | 34                      | 36           | 33                 | 26                                     | 38                   | 24                      | 37                                      |                | 23.9             | 17.15            | 23.7             | 23.7             | 23.3                                                                    | 21.7             |  |
| GerpN                      | 5.93                           | 5.75                    | 5.95         | 5.93               | 5.83                                   | 5.83                 | 5.8                     | 5.95                                    |                | 5.46             | 5.46             | 5.22             | 5.22             | 5.18                                                                    | 4.72             |  |
| Ancestry                   | European                       | European                | European     | European           | East-Asian                             | European             | European                | European                                | East-Asian     | European         | European         | European         | European         | European                                                                | European         |  |
| Sex                        | male                           | female                  | male         | female             | female                                 | female               | male                    | female                                  | female         | female           | female           | female           | female           | female                                                                  | male             |  |
| Diagnosis                  | IPAH                           | IPAH                    | IPAH         | IPAH               | APAH-CHD secondary to double outlet RV | IPAH                 | IPAH                    | IPAH                                    | IPAH           | IPAH             | IPAH             | IPAH             | IPAH             | CHD-PAH                                                                 | CHD-PAH          |  |
| Age at diagnosis [years]   | 71                             | 62                      | 67           | 61                 | 4                                      | 72                   | 65                      | 42                                      | 23             | 27               | 34               | 51               | 68               | 0                                                                       | 55               |  |
| WHO FC                     | 2                              | 3                       | 3            | 3                  | 2                                      | NA                   | NA                      | NA                                      | 4              | 3                | 4                | 4                | 2                | 3                                                                       | 3                |  |
| 6MWD [m]                   | 472                            | 422                     | 660          | 180                | NA                                     | 380                  | NA                      | 245                                     | 350            | NA               | 414              | NA               | 414              | NA                                                                      | 316              |  |
| SpO <sub>2</sub> pre [%]   | 95                             | 97                      | 98           | 97                 | NA                                     | NA                   | NA                      | NA                                      | 99             | 96               | 95               | 98               | 96               | NA                                                                      |                  |  |
| SpO <sub>2</sub> post [%]  | 86                             | 86                      | NA           | 91                 | NA                                     | NA                   | NA                      | NA                                      | 97             | NA               | 99               | 96               | 95               | NA                                                                      |                  |  |
| FEV <sub>1</sub> [% pred.] | 116                            | 90                      | 83           | 67.3               | 85%                                    | NA                   | 77%                     | NA                                      | 74             | 87               | 104              | 95               | 99.1             | NA                                                                      |                  |  |
| FVC [% pred.]              | 115                            | 94                      | 91           | 72.8               | 92%                                    | NA                   | 83%                     | NA                                      | 76             | 90               | 109              | 95.8             | 96.3             | NA                                                                      |                  |  |
| TLC [% pred.]              | NA                             | NA                      | NA           | NA                 | NA                                     | NA                   | 65%                     | NA                                      | NA             | NA               | 105              | 76               | 98               | NA                                                                      |                  |  |
| KCO [% pred.]              | 44                             | 46                      | 46           | 55.2               | NA                                     | NA                   | 35%                     | NA                                      | 73             | 71               | 64               | 78               | 73               | NA                                                                      |                  |  |
| Smoking history            | Never                          | Never                   | Ex-smoker    | Never              | Never                                  | Never                | Ex-smoker               | Never                                   | Never          | Ex-smoker        | Never            | Never            | Never            | Never                                                                   |                  |  |
| mRAP [mmHg]                | 5                              | 8                       | 8            | 3                  | NA                                     | 5                    | 29                      | 14                                      | 15             | 14               | 8                | 12               | 6                | 3                                                                       | 7                |  |
| mPAP [mmHg]                | 62                             | 57                      | 41           | 44                 | NA                                     | 49                   | 66                      | 60                                      | 58             | 64               | 49               | 50               | 62               | 46                                                                      | 69               |  |
| PAWP [mmHg]                | 4                              | 15                      | 12           | 9                  | NA                                     | 5                    | 16                      | 15                                      | 15             | 8                | 10               | 12               | 7                | NA                                                                      | 10               |  |
| CO [L/min]                 | 3.6                            | 4.58                    | 5.97         | 5.23               | NA                                     | 4.33                 | 1.8                     | 4.6                                     | 2.37           | 3.23             | NA               | 3.29             | 4.1              | 4.4                                                                     |                  |  |
| PVR                        | 16.11                          | 9.17                    | 4.86         | 6.69               | NA                                     | NA                   | 27.9                    | 9.8                                     | 18.1           | 17.3             | NA               | 11.6             | 13.4             | NA                                                                      |                  |  |
| Comorbidities              | hyperlipidemia, HTN, DM type 2 | HTN, hypothyroidism     | DM type 2    | CAD, DM type 2     | No                                     | HTN, hyperlipidemia, | HTN, hypothyroidism, OA | Obesity, CAD, DM type 2, hypothyroidism | No             | No               | No               | PFO              | No               | Scimitar syndrome, hypoplastic right lung, ASD with spontaneous closure | Large ASD        |  |
| Family history             | No                             | No                      | No           | No                 | No                                     | No                   | No                      | No                                      | No             | No               | No               | No               | No               | ?                                                                       | ?                |  |
| Status                     | alive                          | alive                   | alive        | dead               | alive                                  | alive                | alive                   | alive                                   | alive          | alive            | alive            | dead             | alive            | alive                                                                   | alive            |  |

Table 4. Clinical characteristics of IPAH patients harbouring protein version 1 posted December 2020. The copyright holder for this preprint (which was not certified by peer review) is the author/funder, who has granted bioRxiv a license to display the preprint in perpetuity. It is made available under aCC-BY-ND 4.0 International license.

class, 6MWD - six-minute walk distance, SpO<sub>2</sub> - arterial oxygen saturation, mRAP - mean right atrial pressure, mPAP - mean pulmonary artery pressure, PAWP - pulmonary artery wedge pressure, CO - cardiac output, PVR - pulmonary vascular resistance, NO - nitric oxide, FEV<sub>1</sub> - forced expiratory volume in 1 second, FVC - forced vital capacity, KCO - transfer factor coefficient for carbon monoxide, COPD - chronic obstructive pulmonary disease, CAD - coronary artery disease, HTN - systemic hypertension, CKD - chronic kidney disease, Hb - haemoglobin, WBC - white blood cells, TSH - thyroid-stimulating hormone. Comorbidities are reported as the number and percentage of cases possessing a disease entity. None of the patients had a history of pulmonary embolism or asthma. Three of the KDR missense variants co-occurred with predicted deleterious variants in established PAH risk genes (*BMPR2* and *AQP1*)

|                                   | <b>KDR missense N=13</b> | <b>KDR PTV N=4</b> | <b>p-value</b> | <b>N</b> |
|-----------------------------------|--------------------------|--------------------|----------------|----------|
| Diagnosis verified: IPAH          | 13 (100%)                | 4 (100%)           | .              | 17       |
| Age [years]                       | 46 [36;59]               | 64 [62;68]         | 0.113          | 17       |
| Sex: female                       | 9 (69%)                  | 2 (50%)            | 0.584          | 17       |
| BMI [kg/m <sup>2</sup> ]          | 29 [24;32]               | 26 [26;30]         | 1              | 13       |
| WHO FC: II/III/IV [%]             | 23.1/9.2/7.7             | 25/75/0            | 1              | 17       |
| 6MWD [m]                          | 312 [150;355]            | 301 [240;362]      | 0.814          | 11       |
| SpO <sub>2</sub> pre [%]          | 95 [93;97]               | 97 [96;97]         | 0.335          | 11       |
| SpO <sub>2</sub> post [%]         | 90 [80;96]               | 86 [86;88]         | 0.926          | 12       |
| mRAP [mmHg]                       | 8 [6;13]                 | 6 [4;8]            | 0.431          | 14       |
| mPAP [mmHg]                       | 53 [42;62]               | 50 [43;58]         | 0.896          | 15       |
| PAWP [mmHg]                       | 10 [8;13]                | 10 [8;13]          | 0.642          | 13       |
| CO [L/min]                        | 4.0 [3.0;5.5]            | 4.9 [4.3;5.4]      | 0.514          | 15       |
| PVR [WU]                          | 10.2 [4.56;14.3]         | 7.93 [6.23;10.9]   | 1              | 13       |
| Acute NO challenge: vasoresponder | 1 (33.3%)                | 1 (25.0%)          | 1              | 7        |
| FEV <sub>1</sub> [% pred.]        | 84 [65;94]               | 86 [79;96]         | 0.48           | 14       |
| FVC [% pred.]                     | 86 [72;97]               | 92 [86;99]         | 0.723          | 14       |
| FEV <sub>1</sub> /FVC ratio       | 0.78 [0.75;0.87]         | 0.78 [0.76;0.79]   | 0.671          | 14       |
| KCO [% pred.]                     | 89 [74;93]               | 46 [46;48]         | 0.008          | 11       |
| Smoking history                   | 6 (54.5%)                | 1 (25.0%)          | 0.677          | 15       |
| COPD                              | 1 (7.69%)                | 0 (0.00%)          | 1              | 17       |
| Pulmonary fibrosis                | 0 (0.00%)                | 2 (50.0%)          | 0.044          | 17       |
| CAD                               | 1 (7.69%)                | 1 (25.0%)          | 0.426          | 17       |
| HTN                               | 5 (38.5%)                | 2 (50.0%)          | 1              | 17       |
| CKD                               | 1 (7.69%)                | 0 (0.00%)          | 1              | 17       |
| Hb [g/l]                          | 154 [140;166]            | 148 [135;152]      | 0.214          | 15       |
| WBC [x10e9/l]                     | 9.20 [6.30;11.0]         | 8.80 [8.23;9.55]   | 0.844          | 15       |
| Platelets [x10e9/l]               | 262 [209;294]            | 216 [188;251]      | 0.361          | 15       |
| Creatinine [umol/l]               | 78.0 [61.5;98.0]         | 67.0 [66.5;96.5]   | 0.866          | 13       |
| TSH [mU/l]                        | 3.65 [1.80;6.90]         | 1.76 [1.72;1.84]   | 0.234          | 12       |



**Table S1. NHH BioResource Rare Diseases domain definitions.**

| <b>Project acronym</b> | <b>Project</b>                                   | <b>Number of individuals in the project</b> |
|------------------------|--------------------------------------------------|---------------------------------------------|
| GEL                    | Genomics England Ltd                             | 3058                                        |
| BPD                    | Bleeding, Thrombotic and Platelet Disorders      | 986                                         |
| PID                    | Primary Immune Disorders                         | 1027                                        |
| CNTRL                  | Processed Controls                               | 50                                          |
| IRD                    | Inherited Retinal Disorders                      | 717                                         |
| NDD                    | Neurological and Developmental Disorders         | 518                                         |
| EDS                    | Ehlers Danlos Syndrome                           | 15                                          |
| HCM                    | Hypertrophic Cardiomyopathy                      | 239                                         |
| PMG                    | Primary Membranoproliferative Glomerulonephritis | 181                                         |
| SRNS                   | Steroid Resistant Nephrotic Syndrome             | 234                                         |
| CSVD                   | Cerebral Small Vessel Disease                    | 134                                         |
| NPD                    | Neuropathic Pain Disorder                        | 185                                         |
| ICP                    | Intrahepatic Cholestasis of Pregnancy            | 267                                         |
| LHON                   | Leber Hereditary Optic Neuropathy                | 54                                          |
| MPMT                   | Multiple Primary Tumours                         | 554                                         |
| SMD                    | Stem Cell & Myeloid Disorders                    | 153                                         |
| PAH                    | Pulmonary arterial hypertension                  | 1123                                        |
| UKBio                  | UK BioBank                                       | 764                                         |
|                        |                                                  | 10259                                       |

|                                  |
|----------------------------------|
| ID capture                       |
| Demographics                     |
| Functional class                 |
| Clinical features by history     |
| Clinical features by examination |
| Risk factors                     |
| Haemodynamics                    |
| Echocardiography                 |
| Electrocardiogram                |
| Lung function                    |
| Associated Diseases              |
| Clinical blood tests             |
| Survival                         |
| Arterial blood gases             |
| Imaging                          |
| Exercise performance             |
| Body system                      |
| Drug treatment history (PAH)     |
| Drug treatment history (other)   |
| Family history                   |
| Epidemiology questionnaire       |

| Parameter                                   | Response                               |
|---------------------------------------------|----------------------------------------|
| ID                                          | character                              |
| Reader                                      | character                              |
| CT scan date                                | date                                   |
| Slice thickness                             | numeric                                |
| Number of slices                            | numeric                                |
| CTPA                                        | done/not done                          |
| HRCT                                        | done/not done                          |
| Expiratory CT                               | done/not done                          |
| Pleural effusion                            | Nil; Trace; Mild; Moderate; Severe     |
| Subcutaneous oedema                         | present, absent                        |
| Severity of GGO centrilobular pattern       | Nil; Trace; Mild; Moderate; Severe     |
| Severity of GGO non-specific mosaic pattern | Nil; Trace; Mild; Moderate; Severe     |
| Distribution of GGO                         | C-central; U-upper; Z-zonal; D-diffuse |
| Pulmonary arteriovenous malformations       | present, absent                        |
| Largest bronchial artery size               | numeric [mm]                           |
| Mediastinal venous collaterals              | present, absent                        |
| Intralobular septal thickening              | Nil; Trace; Mild; Moderate; Severe     |
| Mediastinal lymphadenopathy                 | present, absent                        |
| Mediastinal lymphadenopathy subcarinal      | [mm]                                   |
| Emphysema                                   | Nil; Mild; Moderate; Severe            |
| Bronchial wall thickening                   | Nil; Trace; Mild; Moderate; Severe     |
| Fibrosis                                    | Nil; Mild; Moderate; Severe            |
| Air trapping                                | Nil; Trace; Mild; Moderate; Severe     |
| Subpleural scarring                         | Nil; Mild; Moderate; Severe            |

Table S4. Principal characteristics of the study population, by functional class, sex, VPO 2019. Functional Class, 6MWD - 6-minute walk distance, mRAP - mean right atrial pressure, mPAP - mean pulmonary artery pressure, CO - cardiac output, FEV<sub>1</sub> - forced expiratory capacity in 1 second, FVC - forced vital capacity, KCO - transfer factor coefficient for carbon monoxide, Hb - haemoglobin, RDW - red cell distribution width, WBC - white blood cell count, NTproBNP - N-terminal pro b-type natriuretic peptide, BNP - B-type natriuretic peptide, CRP - C-Reactive Protein, HTN - hypertension, DM - diabetes mellitus, CAD - coronary artery disease, CVA - cerebrovascular accident, COPD - chronic obstructive pulmonary disease, CCB - calcium channel blocker, ERA - endothelin receptor antagonists, PA - prostacyclin analogues, PDE5 - phosphodiesterase type 5, sGC - soluble guanylate cyclase; Entire cohort (n=1122) was composed of IPAH (n=972), HPAH (n=73), PVOD/PCH (n=20), PH associated with left heart disease (n=7), PH associated with lung disease (n=8), chronic thromboembolic pulmonary hypertension (n=6), multifactorial PH (n=6), hereditary hemorrhagic telangiectasia (n=1)

|                                           | ALL<br>N=1122                         | N    | I/HPAH and PVOD/PCH<br>N=1065         | N    |
|-------------------------------------------|---------------------------------------|------|---------------------------------------|------|
| <b>Demographics and functional status</b> |                                       |      |                                       |      |
| Sex: female                               | 760 (68%)                             | 1116 | 732 (69%)                             | 1064 |
| Age [years]                               | 49 [35;63]                            | 1112 | 49 [35;63]                            | 1061 |
| BMI [kg/m <sup>2</sup> ]                  | 27 [23;32]                            | 1015 | 27 [23;31]                            | 970  |
| WHO FC:<br>I/II/III/IV                    | 21 (2%)/217 (20%)/703 (65%)/138 (13%) | 1079 | 21 (2%)/210 (20%)/663 (64%)/135 (13%) | 1029 |
| 6MWD [m]                                  | 335 [220;415]                         | 953  | 336 [220;415]                         | 906  |
| <b>Haemodynamics</b>                      |                                       |      |                                       |      |
| mRAP [mmHg]                               | 8 [5;12]                              | 985  | 8 [5;12]                              | 939  |
| mPAP [mmHg]                               | 53 [44;61]                            | 1052 | 53 [44;61]                            | 1004 |
| CO [L/min]                                | 3.9 [3.1;4.9]                         | 1003 | 3.9 [3.1;4.9]                         | 960  |
| FEV <sub>1</sub> [% pred.]                | 85 [73;97]                            | 849  | 86 [74;97]                            | 811  |
| FVC [% pred.]                             | 94 [81;106]                           | 831  | 95 [82;106]                           | 793  |
| KCO [% pred.]                             | 71 [52;86]                            | 644  | 71 [52;86]                            | 610  |
| <b>Clinical blood tests</b>               |                                       |      |                                       |      |
| Hb [g/l]                                  | 151 [138;165]                         | 847  | 152 [138;164]                         | 805  |
| RDW [%]                                   | 14 [14;16]                            | 413  | 14 [14;16]                            | 392  |
| WBC [x10e9/l]                             | 8.2 [6.8;9.8]                         | 839  | 8.2 [6.8;9.8]                         | 797  |
| Platelets [x10e9/l]                       | 224 [182;272]                         | 836  | 225 [183;274]                         | 795  |
| Creatinine [umol/l]                       | 86 [70;102]                           | 832  | 86 [70;102]                           | 790  |
| NTproBNP [ng/l]                           | 926 [215;2637]                        | 276  | 963 [217;2672]                        | 265  |
| BNP [ng/l]                                | 195 [72;432]                          | 271  | 197 [74.6;454]                        | 252  |
| CRP [mg/l]                                | 4 [2;8]                               | 639  | 4 [2;8]                               | 604  |
| <b>Comorbidities</b>                      |                                       |      |                                       |      |
| HTN                                       | 265 (24%)                             | 1122 | 256 (24%)                             | 1065 |
| DM type 1                                 | 20 (2%)                               | 1122 | 19 (2%)                               | 1065 |
| DM type 2                                 | 138 (12%)                             | 1122 | 132 (12%)                             | 1065 |
| CAD                                       | 45 (4%)                               | 1122 | 42 (4%)                               | 1065 |
| CVA                                       | 17 (2%)                               | 1122 | 15 (1%)                               | 1065 |
| Hypothyroidism                            | 135 (12%)                             | 1122 | 130 (12%)                             | 1065 |
| COPD                                      | 66 (6%)                               | 1122 | 57 (5%)                               | 1065 |
| Asthma                                    | 78 (7%)                               | 1122 | 74 (7%)                               | 1065 |
| Cancer                                    | 4 (0.4%)                              | 1122 | 3 (0.3%)                              | 1065 |
| <b>Medication</b>                         |                                       |      |                                       |      |
| Initial therapy:                          |                                       | 631  |                                       | 604  |
| CCB                                       | 73 (12%)                              |      | 72 (12%)                              |      |
| combination therapy                       | 279 (44%)                             |      | 269 (45%)                             |      |
| ERA                                       | 86 (14%)                              |      | 82 (14%)                              |      |
| PA                                        | 42 (7%)                               |      | 41 (7%)                               |      |
| PDE5 inhibitor                            | 150 (24%)                             |      | 139 (23%)                             |      |
| sGC stimulator                            | 1 (0%)                                |      | 1 (0%)                                |      |

**Table S5. Clinical characteristics of patients with COPD (n=1122) missing this version of posttest (December 22, 2019). The copyright holder for this preprint (which was not certified by peer review) is the author/funder, who has granted bioRxiv a license to display the preprint in perpetuity. It is made available under aCC-BY-ND 4.0 International license.**

|                               | [ALL] N=1122     | KCO [% pred.] missing<br>N=478 | KCO [% pred.] present<br>N=644 | p-value | N    |
|-------------------------------|------------------|--------------------------------|--------------------------------|---------|------|
| Sex: Female                   | 760 (68.1%)      | 326 (69.1%)                    | 434 (67.4%)                    | 0.597   | 1116 |
| Prevalent cases               | 852 (75.9%)      | 411 (86.0%)                    | 441 (68.5%)                    | <0.001  | 1122 |
| BMI [kg/m <sup>2</sup> ]      | 26.9 [23.1;31.5] | 25.6 [22.0;30.1]               | 27.7 [24.1;32.5]               | <0.001  | 1015 |
| Age [years]                   | 48.8 [34.8;62.7] | 44.6 [31.0;58.5]               | 51.3 [38.1;65.5]               | <0.001  | 1112 |
| WHO FC                        |                  |                                |                                | <0.001  | 1079 |
| I                             | 21 (1.95%)       | 13 (2.88%)                     | 8 (1.27%)                      |         |      |
| II                            | 217 (20.1%)      | 117 (25.9%)                    | 100 (15.9%)                    |         |      |
| III                           | 703 (65.2%)      | 269 (59.6%)                    | 434 (69.1%)                    |         |      |
| IV                            | 138 (12.8%)      | 52 (11.5%)                     | 86 (13.7%)                     |         |      |
| 6MWD [m]                      | 340 [230;418]    | 364 [289;432]                  | 314 [192;405]                  | <0.001  | 702  |
| FEV <sub>1</sub> [% pred.]    | 85.0 [73.0;97.0] | 83.2 [69.6;97.0]               | 86.0 [74.0;97.0]               | 0.2     | 849  |
| FVC [% pred.]                 | 94.0 [81.4;106]  | 89.0 [73.0;103]                | 96.0 [82.6;107]                | <0.001  | 831  |
| TLC [% pred.]                 | 95.0 [85.0;104]  | 93.2 [83.7;104]                | 95.0 [86.0;103]                | 0.625   | 639  |
| mRAP [mmHg]                   | 8.00 [5.00;12.0] | 7.00 [5.00;12.0]               | 9.00 [6.00;12.0]               | <0.001  | 985  |
| mPAP [mmHg]                   | 53.0 [44.0;61.0] | 53.0 [44.0;61.0]               | 53.0 [45.0;61.0]               | 0.669   | 1052 |
| PAWP [mmHg]                   | 9.00 [7.00;12.0] | 9.00 [6.00;11.0]               | 10.0 [7.00;12.0]               | 0.001   | 934  |
| CI [L/min/m <sup>2</sup> ]    | 2.17 [1.72;2.67] | 2.31 [1.81;2.82]               | 2.07 [1.68;2.59]               | <0.001  | 946  |
| PVR [WU]                      | 11.0 [7.69;15.1] | 10.6 [7.60;15.2]               | 11.1 [7.69;15.1]               | 0.622   | 893  |
| SvO <sub>2</sub> [%]          | 64.0 [58.0;70.0] | 64.7 [57.8;70.0]               | 63.8 [58.2;70.0]               | 0.732   | 817  |
| Fibrosis [HRCT report]:       |                  |                                |                                | 0.445   | 614  |
| none                          | 586 (95.4%)      | 169 (96.0%)                    | 417 (95.2%)                    |         |      |
| minimal/mild                  | 26 (4.23%)       | 6 (3.41%)                      | 20 (4.57%)                     |         |      |
| moderate                      | 1 (0.16%)        | 0 (0.00%)                      | 1 (0.23%)                      |         |      |
| severe                        | 1 (0.16%)        | 1 (0.57%)                      | 0 (0.00%)                      |         |      |
| Emphysema [HRCT report]:      |                  |                                |                                | 0.029   | 612  |
| none                          | 560 (91.5%)      | 169 (96.0%)                    | 391 (89.7%)                    |         |      |
| minimal/mild                  | 33 (5.39%)       | 3 (1.70%)                      | 30 (6.88%)                     |         |      |
| moderate                      | 15 (2.45%)       | 4 (2.27%)                      | 11 (2.52%)                     |         |      |
| severe                        | 4 (0.65%)        | 0 (0.00%)                      | 4 (0.92%)                      |         |      |
| Smoking history: past/current | 435 (50.6%)      | 97 (38.5%)                     | 338 (55.7%)                    | <0.001  | 859  |
| COPD                          | 66 (5.88%)       | 24 (5.02%)                     | 42 (6.52%)                     | 0.353   | 1122 |
| OSA                           | 58 (5.17%)       | 20 (4.18%)                     | 38 (5.90%)                     | 0.251   | 1122 |
| Asthma                        | 78 (6.95%)       | 15 (3.14%)                     | 63 (9.78%)                     | <0.001  | 1122 |

|                                   | [ALL] N=644      | KCO > 50% pred N=492 | KCO ≤ 50 % pred. N=152 | p-value | N   |
|-----------------------------------|------------------|----------------------|------------------------|---------|-----|
| Age [years]                       | 51 [38;66]       | 47 [36;60]           | 66 [54;71]             | <0.001  | 644 |
| Sex: female                       | 434 (67%)        | 352 (72%)            | 82 (54%)               | <0.001  | 644 |
| Incident cases                    | 203 (31.5%)      | 134 (27.2%)          | 69 (45.4%)             | <0.001  | 644 |
| BMI [kg/m <sup>2</sup> ]          | 27.7 [24.1;32.5] | 27.7 [23.7;32.7]     | 27.7 [24.8;32.3]       | 0.806   | 629 |
| WHO FC                            |                  |                      |                        | 0.013   | 628 |
| I                                 | 8 (1%)           | 7 (1%)               | 1 (1%)                 |         |     |
| II                                | 100 (16%)        | 88 (18%)             | 12 (8%)                |         |     |
| III                               | 434 (69%)        | 320 (67%)            | 114 (77%)              |         |     |
| IV                                | 86 (14%)         | 64 (13%)             | 22 (15%)               |         |     |
| 6MWD [m]                          | 313 [190;404]    | 334 [229;414]        | 219 [120;348]          | <0.001  | 599 |
| SpO <sub>2</sub> pre [%]          | 95.0 [93.0;97.0] | 96.0 [93.0;98.0]     | 92.0 [89.0;95.0]       | <0.001  | 575 |
| SpO <sub>2</sub> post [%]         | 91.0 [85.0;96.0] | 93.0 [88.0;96.0]     | 83.0 [76.0;88.0]       | <0.001  | 529 |
| mRAP [mmHg]                       | 9 [6;12]         | 9 [6;13]             | 9 [6;12]               | 0.375   | 601 |
| mPAP [mmHg]                       | 53 [45;61]       | 54 [46;63]           | 50 [42;57]             | 0.001   | 625 |
| PAWP [mmHg]                       | 10 [7;12]        | 10 [7;12]            | 10 [8;12]              | 0.301   | 560 |
| CO [L/min]                        | 3.8 [3.1;4.8]    | 3.9 [3.1;4.9]        | 3.6 [3.1;4.7]          | 0.282   | 614 |
| SvO <sub>2</sub> [%]              | 64 [58;70]       | 64 [59;71]           | 61 [55;67]             | <0.001  | 572 |
| Acute NO challenge: vasoresponder | 43 (17%)         | 38 (18%)             | 5 (10%)                | 0.204   | 257 |
| FEV <sub>1</sub> [% pred.]        | 86.0 [74.0;97.0] | 85.0 [73.4;96.0]     | 87.0 [77.0;98.0]       | 0.119   | 639 |
| FVC [% pred.]                     | 96.0 [82.6;107]  | 94.0 [81.0;106]      | 101 [87.0;113]         | <0.001  | 628 |
| FEV <sub>1</sub> /FVC ratio       | 0.76 [0.69;0.81] | 0.76 [0.71;0.81]     | 0.70 [0.63;0.77]       | <0.001  | 614 |
| TLC [% pred.]                     | 95.0 [86.0;103]  | 95.0 [85.0;103]      | 95.0 [87.5;104]        | 0.564   | 485 |
| KCO [%pred.]                      | 71 [52;86]       | 78 [67;90]           | 37 [30;44]             | <0.001  | 644 |
| Emphysema (HRCT scan)             |                  |                      |                        | <0.001  | 436 |
| none                              | 391 (90%)        | 307 (95%)            | 84 (74%)               |         |     |
| minimal/mild                      | 30 (7%)          | 12 (4%)              | 18 (16%)               |         |     |
| moderate                          | 11 (3%)          | 2 (1%)               | 9 (8%)                 |         |     |
| severe                            | 4 (1%)           | 1 (0%)               | 3 (3%)                 |         |     |
| Fibrosis (HRCT scan)              |                  |                      |                        | <0.001  | 438 |
| none                              | 417 (95%)        | 319 (98%)            | 98 (87%)               |         |     |
| minimal/mild                      | 20 (5%)          | 6 (2%)               | 14 (12%)               |         |     |
| moderate                          | 1 (0%)           | 0 (0%)               | 1 (1%)                 |         |     |
| Smoking history: past/current     | 338 (55.7%)      | 233 (50.0%)          | 105 (74.5%)            | <0.001  | 607 |
| NTproBNP [ng/l]                   | 980 [248;2673]   | 866 [257;2590]       | 1225 [249;2878]        | 0.359   | 220 |
| BNP [ng/l]                        | 200 [72.9;432]   | 198 [69.7;456]       | 200 [82.2;328]         | 0.798   | 143 |
| Uric acid [mmol/l]                | 0.42 [0.32;0.53] | 0.40 [0.30;0.51]     | 0.48 [0.39;0.56]       | 0.002   | 231 |
| CRP [mg/l]                        | 5.00 [2.00;8.60] | 5.00 [2.00;8.00]     | 4.15 [2.00;9.00]       | 0.953   | 450 |
| Hb [g/l]                          | 154 [139;166]    | 153 [138;166]        | 154 [142;166]          | 0.658   | 603 |
| WBC [x10e9/l]                     | 8 [7;10]         | 8 [7;10]             | 9 [7;10]               | 0.011   | 597 |
| Platelets [x10e9/l]               | 220 [179;268]    | 220 [179;270]        | 220 [182;254]          | 0.516   | 595 |
| Sodium [mmol/l]                   | 139 [138;141]    | 139 [138;141]        | 140 [138;141]          | 0.858   | 597 |
| Potassium [mmol/l]                | 4.20 [4.00;4.50] | 4.20 [3.90;4.50]     | 4.20 [4.00;4.50]       | 0.412   | 591 |
| Urea [mmol/l]                     | 5.80 [4.60;7.70] | 5.60 [4.40;7.10]     | 7.00 [5.30;9.20]       | <0.001  | 594 |
| Creatinine [umol/l]               | 88.0 [73.2;105]  | 87.0 [73.0;102]      | 95.0 [78.5;114]        | 0.002   | 598 |
| COPD                              | 42 (7%)          | 23 (5%)              | 19 (12%)               | 0.001   | 644 |
| Asthma                            | 63 (10%)         | 54 (11%)             | 9 (6%)                 | 0.093   | 644 |
| OSA                               | 38 (6%)          | 29 (6%)              | 9 (6%)                 | 1       | 644 |
| CAD                               | 26 (4%)          | 10 (2%)              | 16 (11%)               | <0.001  | 644 |
| CVA                               | 10 (2%)          | 5 (1%)               | 5 (3%)                 | 0.061   | 644 |
| PAD                               | 2 (0%)           | 0 (0%)               | 2 (1%)                 | 0.055   | 644 |
| HTN                               | 170 (26%)        | 116 (24%)            | 54 (36%)               | 0.005   | 644 |
| DM type 1                         | 9 (1%)           | 8 (2%)               | 1 (1%)                 | 0.693   | 644 |
| DM type 2                         | 93 (14%)         | 60 (12%)             | 33 (22%)               | 0.005   | 644 |
| Hypothyroidism                    | 73 (11%)         | 60 (12%)             | 13 (9%)                | 0.275   | 644 |
| Sjogren syndrome                  | 3 (0%)           | 2 (0%)               | 1 (1%)                 | 0.555   | 644 |

|                                   | [ALL] N=644      | Higher tertile N=214 | Middle tertile N=215 | Lower tertile N=215 | p.overall | N   |
|-----------------------------------|------------------|----------------------|----------------------|---------------------|-----------|-----|
| Age [years]                       | 51 [38;66]       | 44 [37;58]           | 49 [34;61]           | 64 [50;71]          | <0.001    | 644 |
| Sex: female                       | 434 (67%)        | 149 (70%)            | 160 (74%)            | 125 (58%)           | 0.001     | 644 |
| Incident cases                    | 203 (31.5%)      | 58 (27.1%)           | 54 (25.1%)           | 91 (42.3%)          | <0.001    | 644 |
| BMI [kg/m <sup>2</sup> ]          | 27.7 [24.1;32.5] | 29.1 [25.3;34.5]     | 26.8 [23.1;30.9]     | 27.4 [24.2;32.3]    | <0.001    | 629 |
| WHO FC                            |                  |                      |                      |                     | 0.028     | 628 |
| I                                 | 8 (1%)           | 4 (2%)               | 2 (1%)               | 2 (1%)              |           |     |
| II                                | 100 (16%)        | 40 (19%)             | 40 (19%)             | 20 (10%)            |           |     |
| III                               | 434 (69%)        | 143 (68%)            | 135 (65%)            | 156 (74%)           |           |     |
| IV                                | 86 (14%)         | 22 (11%)             | 32 (15%)             | 32 (15%)            |           |     |
| 6MWD [m]                          | 313 [190;404]    | 331 [240;420]        | 340 [230;418]        | 240 [131;360]       | <0.001    | 599 |
| SpO <sub>2</sub> pre [%]          | 95.0 [93.0;97.0] | 96.0 [94.0;98.0]     | 96.0 [93.0;98.0]     | 93.0 [90.0;96.0]    | <0.001    | 575 |
| SpO <sub>2</sub> post [%]         | 91.0 [85.0;96.0] | 94.0 [89.0;96.0]     | 93.0 [88.0;96.0]     | 85.0 [79.0;91.0]    | <0.001    | 529 |
| mRAP [mmHg]                       | 9 [6;12]         | 9 [7;13]             | 9 [6;12]             | 8 [5;12]            | 0.224     | 601 |
| mPAP [mmHg]                       | 53 [45;61]       | 55 [47;65]           | 53 [46;62]           | 51 [42;57]          | <0.001    | 625 |
| PAWP [mmHg]                       | 10 [7;12]        | 10 [8;12]            | 10 [7;12]            | 10 [7;12]           | 0.487     | 560 |
| CO [L/min]                        | 3.8 [3.1;4.8]    | 3.8 [3.0;5.0]        | 4.0 [3.1;4.8]        | 3.8 [3.1;4.8]       | 0.967     | 614 |
| SvO <sub>2</sub> [%]              | 64 [58;70]       | 64 [60;71]           | 65 [59;70]           | 62 [56;68]          | 0.001     | 572 |
| Acute NO challenge: vasoresponder | 43 (17%)         | 15 (17%)             | 21 (24%)             | 7 (9%)              | 0.024     | 257 |
| FEV <sub>1</sub> [% pred.]        | 86.0 [74.0;97.0] | 83.8 [72.9;95.0]     | 86.0 [73.9;97.4]     | 87.0 [77.0;98.0]    | 0.08      | 639 |
| FVC [% pred.]                     | 96.0 [82.6;107]  | 90.0 [79.8;101]      | 95.9 [83.0;108]      | 100 [86.9;112]      | <0.001    | 628 |
| FEV <sub>1</sub> /FVC ratio       | 0.76 [0.69;0.81] | 0.78 [0.72;0.82]     | 0.76 [0.69;0.81]     | 0.71 [0.65;0.78]    | <0.001    | 614 |
| TLC [% pred.]                     | 95.0 [86.0;103]  | 94.0 [86.2;103]      | 96.0 [83.0;104]      | 97.0 [87.0;102]     | 0.787     | 485 |
| KCO [% pred.]                     | 71 [52;86]       | 92 [86;101]          | 71 [67;76]           | 42 [33;52]          | <0.001    | 644 |
| Emphysema (HRCT scan):            |                  |                      |                      |                     | <0.001    | 436 |
| none                              | 391 (90%)        | 144 (99%)            | 128 (96%)            | 119 (76%)           |           |     |
| minimal/mild                      | 30 (7%)          | 2 (1%)               | 4 (3%)               | 24 (15%)            |           |     |
| moderate                          | 11 (3%)          | 0 (0%)               | 0 (0%)               | 11 (7%)             |           |     |
| severe                            | 4 (1%)           | 0 (0%)               | 1 (1%)               | 3 (2%)              |           |     |
| Fibrosis (HRCT scan):             |                  |                      |                      |                     | <0.001    | 438 |
| none                              | 417 (95%)        | 145 (99%)            | 132 (99%)            | 140 (89%)           |           |     |
| minimal/mild                      | 20 (5%)          | 2 (1%)               | 2 (1%)               | 16 (10%)            |           |     |
| moderate                          | 1 (0%)           | 0 (0%)               | 0 (0%)               | 1 (1%)              |           |     |
| Smoking history: past/current     | 338 (55.7%)      | 89 (42.4%)           | 106 (52.7%)          | 143 (73.0%)         | <0.001    | 607 |
| NTproBNP [ng/l]                   | 980 [248;2673]   | 842 [167;2358]       | 902 [310;2593]       | 1225 [237;2811]     | 0.539     | 220 |
| BNP [ng/l]                        | 200 [72.9;432]   | 193 [71.7;392]       | 145 [67.5;427]       | 214 [82.2;448]      | 0.659     | 143 |
| Uric acid [mmol/l]                | 0.42 [0.32;0.53] | 0.40 [0.28;0.47]     | 0.40 [0.32;0.51]     | 0.48 [0.38;0.55]    | 0.011     | 231 |
| CRP [mg/l]                        | 5.00 [2.00;8.60] | 5.00 [2.00;8.00]     | 5.00 [2.00;9.32]     | 4.00 [2.00;8.57]    | 0.496     | 450 |
| Hb [g/l]                          | 154 [139;166]    | 160 [145;169]        | 149 [136;164]        | 151 [140;165]       | <0.001    | 603 |
| WBC [x10e9/l]                     | 8 [7;10]         | 8 [7;9]              | 8 [7;10]             | 9 [7;10]            | 0.005     | 597 |
| Platelets [x10e9/l]               | 220 [179;268]    | 224 [183;262]        | 219 [174;276]        | 217 [184;262]       | 0.89      | 595 |
| Sodium [mmol/l]                   | 139 [138;141]    | 140 [138;141]        | 139 [137;141]        | 140 [138;141]       | 0.623     | 597 |
| Potassium [mmol/l]                | 4.20 [4.00;4.50] | 4.30 [4.00;4.50]     | 4.20 [3.90;4.40]     | 4.30 [4.00;4.50]    | 0.13      | 591 |
| Urea [mmol/l]                     | 5.80 [4.60;7.70] | 5.50 [4.43;7.00]     | 5.70 [4.30;7.10]     | 6.70 [5.15;8.80]    | <0.001    | 594 |
| Creatinine [μmol/l]               | 88.0 [73.2;105]  | 87.0 [73.0;99.5]     | 86.0 [72.0;102]      | 92.5 [77.0;111]     | 0.003     | 598 |
| COPD                              | 42 (7%)          | 5 (2%)               | 12 (6%)              | 25 (12%)            | <0.001    | 644 |
| Asthma                            | 63 (10%)         | 26 (12%)             | 25 (12%)             | 12 (6%)             | 0.039     | 644 |
| OSA                               | 38 (6%)          | 12 (6%)              | 11 (5%)              | 15 (7%)             | 0.698     | 644 |
| CAD                               | 26 (4%)          | 2 (1%)               | 4 (2%)               | 20 (9%)             | <0.001    | 644 |
| CVA                               | 10 (2%)          | 1 (0%)               | 3 (1%)               | 6 (3%)              | 0.174     | 644 |
| PAD                               | 2 (0%)           | 0 (0%)               | 0 (0%)               | 2 (1%)              | 0.332     | 644 |
| HTN                               | 170 (26%)        | 46 (21%)             | 53 (25%)             | 71 (33%)            | 0.02      | 644 |
| DM type 1                         | 9 (1%)           | 2 (1%)               | 5 (2%)               | 2 (1%)              | 0.526     | 644 |
| DM type 2                         | 93 (14%)         | 22 (10%)             | 22 (10%)             | 49 (23%)            | <0.001    | 644 |
| Hypothyroidism                    | 73 (11%)         | 25 (12%)             | 30 (14%)             | 18 (8%)             | 0.185     | 644 |
| Sjogren syndrome                  | 3 (0%)           | 2 (1%)               | 0 (0%)               | 1 (0%)              | 0.331     | 644 |

PVR - pulmonary vascular resistance, WU - Wood units, KCO - transfer coefficient of carbon monoxide, CAD - coronary artery disease, COPD - chronic obstructive pulmonary disease, HTN - systemic hypertension, HRCT - High-Resolution Computerised Tomography

|                            | No event N=481 | Event N=163 | Univariate       |         | Multivariate      |         |
|----------------------------|----------------|-------------|------------------|---------|-------------------|---------|
|                            |                |             | HR [95%CI]       | p-value | HR [95%CI]        | p-value |
| Sex:                       |                |             |                  | <0.001  |                   | <0.001  |
| female                     | 343 (71.3%)    | 91 (55.8%)  | Ref.             |         | Ref.              |         |
| male                       | 138 (28.7%)    | 72 (44.2%)  | 1.98 [1.45;2.70] |         | 2.93 [1.81;4.75]  |         |
| Age [years]                | 4.80 (1.50)    | 6.17 (1.59) | 1.75 [1.56;1.96] | <0.001  | 1.57 [1.27;1.94]  | <0.001  |
| Incident/Prevalent:        |                |             |                  | <0.001  |                   | 0.131   |
| incident                   | 151 (31.4%)    | 52 (31.9%)  | Ref.             |         | Ref.              |         |
| prevalent                  | 330 (68.6%)    | 111 (68.1%) | 0.40 [0.28;0.58] |         | 0.65 [0.37;1.14]  |         |
| 6MWD [m]                   | 32.9 (15.0)    | 21.7 (12.9) | 0.95 [0.94;0.96] | <0.001  | 0.97 [0.95;0.99]  | 0.002   |
| mRAP [mmHg]                | 1.84 (1.07)    | 2.15 (1.13) | 1.26 [1.11;1.44] | 0.001   | 1.28 [1.05;1.57]  | 0.016   |
| mPAP [mmHg]                | 10.9 (2.75)    | 10.4 (2.34) | 0.94 [0.88;1.00] | 0.038   | 1.08 [0.97;1.2]   | 0.142   |
| CI [L/min/m <sup>2</sup> ] | 2.28 (0.78)    | 2.10 (0.68) | 0.67 [0.53;0.86] | 0.002   | 0.98 [0.62;1.55]  | 0.923   |
| PVR [WU]                   | 12.1 (5.96)    | 11.8 (4.94) | 1.00 [0.97;1.03] | 0.89    |                   |         |
| KCO [%pred]                | 7.35 (2.22)    | 5.71 (2.41) | 0.71 [0.66;0.77] | <0.001  | 0.79 [0.7;0.88]   | <0.001  |
| Smoking history:           |                |             |                  | 0.002   |                   | 0.692   |
| no                         | 215 (47.5%)    | 54 (35.1%)  | Ref.             |         | Ref.              |         |
| past/current               | 238 (52.5%)    | 100 (64.9%) | 1.67 [1.20;2.33] |         | 1.11 [0.66;1.88]  |         |
| CAD:                       |                |             |                  | 0.002   |                   | 0.081   |
| no                         | 467 (97.1%)    | 151 (92.6%) | Ref.             |         | Ref.              |         |
| yes                        | 14 (2.91%)     | 12 (7.36%)  | 2.51 [1.39;4.53] |         | 0.38 [0.13;1.13]  |         |
| COPD:                      |                |             |                  | 0.141   |                   | 0.268   |
| no                         | 452 (94.0%)    | 150 (92.0%) | Ref.             |         | Ref.              |         |
| yes                        | 29 (6.03%)     | 13 (7.98%)  | 1.53 [0.87;2.69] |         | 0.59 [0.23;1.5]   |         |
| HTN:                       |                |             |                  | <0.001  |                   |         |
| no                         | 374 (77.8%)    | 100 (61.3%) | Ref.             |         | Ref.              |         |
| yes                        | 107 (22.2%)    | 63 (38.7%)  | 1.92 [1.40;2.63] |         | 1.12 [0.68;1.84]  |         |
| Emphysema (HRCT scan):     |                |             |                  | 0.012   |                   |         |
| none                       | 300 (91.5%)    | 91 (84.3%)  | Ref.             |         | Ref.              |         |
| minimal/mild               | 19 (5.79%)     | 11 (10.2%)  | 2.12 [1.13;3.98] |         | 0.85 [0.38;1.92]  | 0.696   |
| moderate                   | 6 (1.83%)      | 5 (4.63%)   | 2.83 [1.15;6.98] |         | 0.7 [0.19;2.61]   | 0.594   |
| severe                     | 3 (0.91%)      | 1 (0.93%)   | 2.36 [0.33;17.0] |         | 0 [0;Inf]         | 0.996   |
| Fibrosis (HRCT scan):      |                |             |                  | 0.003   |                   |         |
| none                       | 321 (97.0%)    | 96 (89.7%)  | Ref.             |         | Ref.              |         |
| minimal/mild               | 10 (3.02%)     | 10 (9.35%)  | 2.79 [1.45;5.36] |         | 0.83 [0.36;1.93]  | 0.672   |
| moderate                   | 0 (0.00%)      | 1 (0.93%)   | 3.29 [0.46;23.6] |         | 3.98 [0.47;33.58] | 0.204   |



|                               | [ALL] N=1112     | Lower tertile N=381 | Middle tertile N=376 | Higher tertile N=355 | p.overall | N    |
|-------------------------------|------------------|---------------------|----------------------|----------------------|-----------|------|
| Age [years]                   | 49 [35;63]       | 30 [25;35]          | 50 [45;54]           | 68 [64;73]           | <0.001    | 1112 |
| Sex: female                   | 757 (68%)        | 276 (72%)           | 273 (73%)            | 208 (59%)            | <0.001    | 1112 |
| Incident cases                | 270 (24.3%)      | 77 (20.2%)          | 74 (19.7%)           | 119 (33.5%)          | <0.001    | 1112 |
| BMI [kg/m <sup>2</sup> ]      | 26.9 [23.1;31.5] | 24.2 [21.0;29.3]    | 28.0 [24.3;32.5]     | 28.1 [25.1;32.0]     | <0.001    | 1015 |
| WHO FC                        |                  |                     |                      |                      | <0.001    | 1078 |
| I                             | 21 (2%)          | 15 (4%)             | 3 (1%)               | 3 (1%)               |           |      |
| II                            | 217 (20%)        | 95 (26%)            | 79 (21%)             | 43 (12%)             |           |      |
| III                           | 703 (65%)        | 201 (56%)           | 248 (67%)            | 254 (73%)            |           |      |
| IV                            | 137 (13%)        | 50 (14%)            | 40 (11%)             | 47 (14%)             |           |      |
| 6MWD [m]                      | 335 [220;415]    | 375 [302;460]       | 343 [250;420]        | 236 [134;348]        | <0.001    | 953  |
| SpO <sub>2</sub> pre [%]      | 96.0 [93.0;97.0] | 97.0 [95.0;98.0]    | 96.0 [93.0;97.0]     | 94.0 [90.0;96.0]     | <0.001    | 890  |
| SpO <sub>2</sub> post [%]     | 91.0 [85.0;95.0] | 94.0 [88.0;97.0]    | 92.0 [86.0;96.0]     | 88.0 [82.0;92.8]     | <0.001    | 830  |
| mRAP [mmHg]                   | 8 [5;12]         | 8 [5;12]            | 9 [6;13]             | 8 [5;12]             | 0.046     | 984  |
| mPAP [mmHg]                   | 53 [44;61]       | 55 [47;66]          | 55 [48;62]           | 48 [40;57]           | <0.001    | 1051 |
| PAWP [mmHg]                   | 9 [7;12]         | 9 [6;11]            | 9 [7;12]             | 10 [7;13]            | 0.004     | 933  |
| CO [L/min]                    | 3.9 [3.1;4.9]    | 4.0 [3.1;5.0]       | 3.9 [3.1;4.9]        | 3.8 [3.2;4.8]        | 0.651     | 1003 |
| SvO <sub>2</sub> [%]          | 64 [58;70]       | 67 [60;72]          | 64 [58;70]           | 62 [57;67]           | <0.001    | 817  |
| Acute NO challenge            | 59 (14%)         | 31 (17%)            | 21 (14%)             | 7 (7%)               | 0.078     | 435  |
| FEV <sub>1</sub> [% pred.]    | 85.0 [73.0;97.0] | 87.0 [77.0;97.0]    | 84.0 [71.0;96.0]     | 85.2 [71.1;97.9]     | 0.34      | 849  |
| FVC [% pred.]                 | 94.0 [81.4;106]  | 90.0 [81.0;102]     | 96.0 [82.0;108]      | 96.3 [82.0;108]      | 0.018     | 831  |
| FEV <sub>1</sub> /FVC ratio   | 0.76 [0.69;0.81] | 0.81 [0.77;0.86]    | 0.75 [0.69;0.80]     | 0.72 [0.66;0.77]     | <0.001    | 760  |
| TLC [% pred.]                 | 95.0 [85.0;104]  | 95.0 [85.0;103]     | 95.0 [87.0;106]      | 93.6 [83.0;102]      | 0.082     | 639  |
| KCO [% pred.]                 | 71 [52;86]       | 76 [65;91]          | 76 [62;88]           | 57 [40;78]           | <0.001    | 644  |
| Emphysema:                    |                  |                     |                      |                      | <0.001    | 611  |
| none                          | 559 (91%)        | 193 (99%)           | 198 (93%)            | 168 (82%)            |           |      |
| minimal/mild                  | 33 (5%)          | 1 (1%)              | 10 (5%)              | 22 (11%)             |           |      |
| moderate                      | 15 (2%)          | 0 (0%)              | 4 (2%)               | 11 (5%)              |           |      |
| severe                        | 4 (1%)           | 0 (0%)              | 0 (0%)               | 4 (2%)               |           |      |
| Fibrosis:                     |                  |                     |                      |                      | <0.001    | 613  |
| none                          | 585 (95%)        | 193 (98%)           | 208 (98%)            | 184 (90%)            |           |      |
| minimal/mild                  | 26 (4%)          | 3 (2%)              | 2 (1%)               | 21 (10%)             |           |      |
| moderate                      | 1 (0%)           | 0 (0%)              | 1 (0%)               | 0 (0%)               |           |      |
| severe                        | 1 (0%)           | 0 (0%)              | 1 (0%)               | 0 (0%)               |           |      |
| Smoking history: past/current | 435 (50.8%)      | 107 (36.9%)         | 153 (53.5%)          | 175 (62.3%)          | <0.001    | 857  |
| NTproBNP [ng/l]               | 926 [215;2637]   | 345 [122;1640]      | 763 [158;1356]       | 1996 [501;3706]      | <0.001    | 276  |
| BNP [ng/l]                    | 195 [72.4;432]   | 117 [30.0;394]      | 181 [85.1;398]       | 236 [112;481]        | 0.005     | 271  |
| Uric acid [mmol/l]            | 0.41 [0.31;0.52] | 0.37 [0.26;0.46]    | 0.41 [0.30;0.50]     | 0.48 [0.36;0.56]     | <0.001    | 358  |
| CRP [mg/l]                    | 4.30 [2.00;8.50] | 4.00 [2.00;7.00]    | 4.15 [2.00;8.50]     | 5.00 [2.50;9.10]     | 0.151     | 639  |
| Hb [g/l]                      | 151 [138;165]    | 152 [138;164]       | 154 [141;166]        | 149 [133;163]        | 0.007     | 847  |
| WBC [x10e9/l]                 | 8 [7;10]         | 8 [6;10]            | 8 [7;10]             | 8 [7;10]             | 0.73      | 839  |
| Platelets [x10e9/l]           | 224 [182;272]    | 231 [186;280]       | 219 [181;261]        | 221 [179;272]        | 0.072     | 836  |
| Sodium [mmol/l]               | 140 [138;141]    | 140 [138;141]       | 139 [138;141]        | 140 [137;141]        | 0.728     | 835  |
| Potassium [mmol/l]            | 4.20 [3.90;4.50] | 4.20 [3.98;4.40]    | 4.20 [3.90;4.40]     | 4.30 [4.00;4.50]     | 0.03      | 830  |
| Urea [mmol/l]                 | 5.70 [4.40;7.60] | 4.80 [3.88;5.81]    | 5.50 [4.30;6.70]     | 7.60 [5.90;10.1]     | <0.001    | 830  |
| Creatinine [μmol/l]           | 85.5 [70.0;102]  | 79.0 [68.0;93.5]    | 82.0 [69.0;96.0]     | 96.0 [80.0;121]      | <0.001    | 832  |
| COPD                          | 65 (6%)          | 2 (1%)              | 22 (6%)              | 41 (12%)             | <0.001    | 1112 |
| Asthma                        | 78 (7%)          | 32 (8%)             | 32 (9%)              | 14 (4%)              | 0.023     | 1112 |
| OSA                           | 57 (5%)          | 5 (1%)              | 21 (6%)              | 31 (9%)              | <0.001    | 1112 |
| CAD                           | 44 (4%)          | 0 (0%)              | 9 (2%)               | 35 (10%)             | <0.001    | 1112 |
| CVA                           | 17 (2%)          | 2 (1%)              | 6 (2%)               | 9 (3%)               | 0.084     | 1112 |
| PAD                           | 5 (0%)           | 0 (0%)              | 0 (0%)               | 5 (1%)               | 0.003     | 1112 |
| HTN                           | 264 (24%)        | 19 (5%)             | 80 (21%)             | 165 (46%)            | <0.001    | 1112 |
| DM type 1                     | 19 (2%)          | 7 (2%)              | 6 (2%)               | 6 (2%)               | 0.967     | 1112 |
| DM type 2                     | 137 (12%)        | 5 (1%)              | 37 (10%)             | 95 (27%)             | <0.001    | 1112 |
| Hypothyroidism                | 135 (12%)        | 38 (10%)            | 49 (13%)             | 48 (14%)             | 0.274     | 1112 |
| Systemic lupus erythromatosus | 1 (0%)           | 0 (0%)              | 0 (0%)               | 1 (0%)               | 0.319     | 1112 |
| Systemic sclerosis            | 1 (0%)           | 0 (0%)              | 0 (0%)               | 1 (0%)               | 0.319     | 1112 |
| Ankylosing spondylitis        | 1 (0.09%)        | 0 (0.00%)           | 0 (0.00%)            | 1 (0.28%)            | 0.319     | 1112 |
| Sjogren syndrome              | 5 (0%)           | 2 (1%)              | 1 (0%)               | 2 (1%)               | 0.871     | 1112 |

bioRxiv preprint doi: <https://doi.org/10.1101/2019.11.14.374219>; this version posted December 22, 2019. The copyright holder for this preprint (which was not certified by peer review) is the author/funder, who has granted bioRxiv a license to display the preprint in perpetuity. It is made available under aCC-BY-NC-ND 4.0 International license.

Cohen's Kappa=0.679, p-value <0.001; GGO distribution unweighted Cohen's Kappa=0.49, p-value <0.001; no positive findings; Pulmonary arteriovenous malformations - no positive findings; largest BA size - no positive findings; Mediastinal venous collaterals: unweighted Cohen's Kappa = 1, p-value <0.001; Intralobular septal thickening weighted Cohen's Kappa = 1, p-value <0.001; Mediastinal lymphadenopathy unweighted Cohen's Kappa=0.83, p-value <0.001; Mediastinal lymphadenopathy size [mm] intraclass correlation coefficient (ICC) 0.717, p-value 0.088; Emphysema - not enough positive findings; Bronchial wall thickening - not enough positive findings, Fibrosis - no positive findings; Pleural effusion weighted Cohen's Kappa 0.826, p-value <0.001; Air trapping weighted Cohen's Kappa 0.845, p-value <0.001; Subpleural scarring - not enough positive findings.

|                                                   | [ALL] N=269 | BMPR2 N=44  | EIF2AK4 N=6 | EIF2AK4 bial. N=7 | KDR missense N=5 | KDR PTV N=4 | no mutation N=185 | other mutations N=18 | p.overall | N   |
|---------------------------------------------------|-------------|-------------|-------------|-------------------|------------------|-------------|-------------------|----------------------|-----------|-----|
| <b>Sex: female</b>                                | 179 (66.5%) | 28 (63.6%)  | 5 (83.3%)   | 3 (42.9%)         | 3 (60.0%)        | 2 (50.0%)   | 129 (69.7%)       | 9 (50.0%)            | 0.341     | 269 |
| <b>Age of diagnosis</b>                           | 50.2 (17.0) | 44.2 (13.7) | 51.0 (16.7) | 28.5 (10.8)       | 36.6 (13.1)      | 65.2 (4.3)  | 53.1 (17.2)       | 44.4 (14.1)          | <0.001    | 268 |
| <b>Diagnosis verified:</b>                        |             |             |             |                   |                  |             |                   |                      |           | 269 |
| HPAH                                              | 20 (7.4%)   | 13 (29.5%)  | 0 (0.0%)    | 0 (0.0%)          | 0 (0.0%)         | 0 (0.0%)    | 4 (2.2%)          | 3 (16.7%)            |           |     |
| IPAH                                              | 237 (88.1%) | 31 (70.5%)  | 5 (83.3%)   | 4 (57.1%)         | 5 (100.0%)       | 4 (100.0%)  | 173 (93.5%)       | 15 (83.3%)           |           |     |
| PCH                                               | 1 (0.4%)    | 0 (0.0%)    | 0 (0.0%)    | 1 (14.3%)         | 0 (0.0%)         | 0 (0.0%)    | 0 (0.0%)          | 0 (0.0%)             |           |     |
| PVOD                                              | 11 (4.1%)   | 0 (0.0%)    | 1 (16.7%)   | 2 (28.6%)         | 0 (0.0%)         | 0 (0.0%)    | 8 (4.3%)          | 0 (0.0%)             |           |     |
| <b>Severity of GGO centrilobular pattern:</b>     |             |             |             |                   |                  |             |                   |                      |           | 269 |
| Nil                                               | 167 (62.1%) | 22 (50.0%)  | 4 (66.7%)   | 2 (28.6%)         | 4 (80.0%)        | 2 (50.0%)   | 121 (65.4%)       | 12 (66.7%)           |           |     |
| Trace                                             | 29 (10.8%)  | 3 (6.8%)    | 0 (0.0%)    | 1 (14.3%)         | 0 (0.0%)         | 0 (0.0%)    | 23 (12.4%)        | 2 (11.1%)            |           |     |
| Mild                                              | 29 (10.8%)  | 9 (20.5%)   | 0 (0.0%)    | 1 (14.3%)         | 0 (0.0%)         | 2 (50.0%)   | 16 (8.6%)         | 1 (5.6%)             |           |     |
| Moderate                                          | 24 (8.9%)   | 3 (6.8%)    | 0 (0.0%)    | 1 (14.3%)         | 1 (20.0%)        | 0 (0.0%)    | 17 (9.2%)         | 2 (11.1%)            |           |     |
| Severe                                            | 20 (7.4%)   | 7 (15.9%)   | 2 (33.3%)   | 2 (28.6%)         | 0 (0.0%)         | 0 (0.0%)    | 8 (4.3%)          | 1 (5.6%)             |           |     |
| <b>Severity of GGO non-specific pattern:</b>      |             |             |             |                   |                  |             |                   |                      |           | 269 |
| Nil                                               | 240 (89.2%) | 42 (95.5%)  | 3 (50.0%)   | 5 (71.4%)         | 5 (100.0%)       | 2 (50.0%)   | 167 (90.3%)       | 16 (88.9%)           |           |     |
| Trace                                             | 10 (3.7%)   | 1 (2.3%)    | 2 (33.3%)   | 0 (0.0%)          | 0 (0.0%)         | 1 (25.0%)   | 6 (3.2%)          | 0 (0.0%)             |           |     |
| Mild                                              | 11 (4.1%)   | 1 (2.3%)    | 0 (0.0%)    | 1 (14.3%)         | 0 (0.0%)         | 1 (25.0%)   | 7 (3.8%)          | 1 (5.6%)             |           |     |
| Moderate                                          | 7 (2.6%)    | 0 (0.0%)    | 1 (16.7%)   | 1 (14.3%)         | 0 (0.0%)         | 0 (0.0%)    | 4 (2.2%)          | 1 (5.6%)             |           |     |
| Severe                                            | 1 (0.4%)    | 0 (0.0%)    | 0 (0.0%)    | 0 (0.0%)          | 0 (0.0%)         | 0 (0.0%)    | 1 (0.5%)          | 0 (0.0%)             |           |     |
| <b>Distribution of GGO:</b>                       |             |             |             |                   |                  |             |                   |                      | 0.108     | 122 |
| C                                                 | 11 (9.0%)   | 0 (0.0%)    | 1 (20.0%)   | 2 (40.0%)         | 0 (0.0%)         | 2 (66.7%)   | 6 (7.7%)          | 0 (0.0%)             |           |     |
| D                                                 | 81 (66.4%)  | 19 (90.5%)  | 3 (60.0%)   | 3 (60.0%)         | 2 (100.0%)       | 1 (33.3%)   | 48 (61.5%)        | 5 (62.5%)            |           |     |
| U                                                 | 14 (11.5%)  | 1 (4.8%)    | 0 (0.0%)    | 0 (0.0%)          | 0 (0.0%)         | 0 (0.0%)    | 12 (15.4%)        | 1 (12.5%)            |           |     |
| Z                                                 | 16 (13.1%)  | 1 (4.8%)    | 1 (20.0%)   | 0 (0.0%)          | 0 (0.0%)         | 0 (0.0%)    | 12 (15.4%)        | 2 (25.0%)            |           |     |
| <b>Pulmonary arteriovenous malformations: Yes</b> | 4 (1.6%)    | 3 (7.3%)    | 0 (0.0%)    | 0 (0.0%)          | 0 (0.0%)         | 0 (0.0%)    | 1 (0.6%)          | 0 (0.0%)             | 0.152     | 246 |
| <b>Largest BA size [mm]</b>                       | 3.0 (0.6)   | 3.4 (0.5)   | 3.0 (.)     | 2.5 (0.2)         | (.)              | (.)         | 2.5 (0.4)         | 4.0 (.)              | 0.037     | 12  |
| <b>Mediastinal venous collaterals: Yes</b>        | 206 (94.1%) | 37 (100.0%) | 1 (100.0%)  | 0 (%)             | 5 (100.0%)       | 3 (100.0%)  | 147 (91.9%)       | 13 (100.0%)          | 0.379     | 219 |
| <b>Intralobular septal thickening:</b>            |             |             |             |                   |                  |             |                   |                      | 0.111     | 243 |
| Nil                                               | 216 (88.9%) | 37 (92.5%)  | 0 (0.0%)    | 0 (%)             | 4 (80.0%)        | 4 (100.0%)  | 155 (88.6%)       | 16 (88.9%)           |           |     |
| Trace                                             | 15 (6.2%)   | 2 (5.0%)    | 0 (0.0%)    | 0 (%)             | 1 (20.0%)        | 0 (0.0%)    | 12 (6.9%)         | 0 (0.0%)             |           |     |
| Mild                                              | 9 (3.7%)    | 1 (2.5%)    | 0 (0.0%)    | 0 (%)             | 0 (0.0%)         | 0 (0.0%)    | 7 (4.0%)          | 1 (5.6%)             |           |     |
| Moderate                                          | 3 (1.2%)    | 0 (0.0%)    | 1 (100.0%)  | 0 (%)             | 0 (0.0%)         | 0 (0.0%)    | 1 (0.6%)          | 1 (5.6%)             |           |     |
| <b>Mediastinal lymphadenopathy: Yes</b>           | 218 (81.3%) | 40 (90.9%)  | 3 (50.0%)   | 3 (42.9%)         | 2 (50.0%)        | 1 (25.0%)   | 151 (81.6%)       | 18 (100.0%)          | <0.001    | 268 |
| <b>Mediastinal lymphadenopathy [mm]</b>           | 14.9 (4.0)  | 12.5 (1.3)  | 17.0 (3.6)  | 14.8 (2.4)        | 15.5 (0.7)       | 11.0 (0.0)  | 15.3 (4.4)        | (.)                  | 0.354     | 50  |
| <b>Emphysema:</b>                                 |             |             |             |                   |                  |             |                   |                      | 0.813     | 269 |
| Nil                                               | 235 (87.4%) | 38 (86.4%)  | 5 (83.3%)   | 7 (100.0%)        | 4 (80.0%)        | 3 (75.0%)   | 161 (87.0%)       | 17 (94.4%)           |           |     |
| Trace                                             | 20 (7.4%)   | 4 (9.1%)    | 1 (16.7%)   | 0 (0.0%)          | 1 (20.0%)        | 0 (0.0%)    | 13 (7.0%)         | 1 (5.6%)             |           |     |
| Mild                                              | 8 (3.0%)    | 1 (2.3%)    | 0 (0.0%)    | 0 (0.0%)          | 0 (0.0%)         | 1 (25.0%)   | 6 (3.2%)          | 0 (0.0%)             |           |     |
| Moderate                                          | 6 (2.2%)    | 1 (2.3%)    | 0 (0.0%)    | 0 (0.0%)          | 0 (0.0%)         | 0 (0.0%)    | 5 (2.7%)          | 0 (0.0%)             |           |     |
| <b>Bronchial wall thickening:</b>                 |             |             |             |                   |                  |             |                   |                      | 0.057     | 243 |
| Nil                                               | 211 (86.8%) | 33 (82.5%)  | 0 (0.0%)    | 0 (%)             | 5 (100.0%)       | 3 (75.0%)   | 157 (89.7%)       | 13 (72.2%)           |           |     |
| Trace                                             | 19 (7.8%)   | 5 (12.5%)   | 1 (100.0%)  | 0 (%)             | 0 (0.0%)         | 0 (0.0%)    | 11 (6.3%)         | 2 (11.1%)            |           |     |
| Mild                                              | 11 (4.5%)   | 2 (5.0%)    | 0 (0.0%)    | 0 (%)             | 0 (0.0%)         | 1 (25.0%)   | 6 (3.4%)          | 2 (11.1%)            |           |     |
| Moderate                                          | 2 (0.8%)    | 0 (0.0%)    | 0 (0.0%)    | 0 (%)             | 0 (0.0%)         | 0 (0.0%)    | 1 (0.6%)          | 1 (5.6%)             |           |     |
| <b>Fibrosis:</b>                                  |             |             |             |                   |                  |             |                   |                      | 0.059     | 269 |
| Nil                                               | 257 (95.5%) | 43 (97.7%)  | 6 (100.0%)  | 7 (100.0%)        | 5 (100.0%)       | 2 (50.0%)   | 177 (95.7%)       | 17 (94.4%)           |           |     |
| Trace                                             | 5 (1.9%)    | 0 (0.0%)    | 0 (0.0%)    | 0 (0.0%)          | 0 (0.0%)         | 0 (0.0%)    | 5 (2.7%)          | 0 (0.0%)             |           |     |
| Mild                                              | 6 (2.2%)    | 1 (2.3%)    | 0 (0.0%)    | 0 (0.0%)          | 0 (0.0%)         | 2 (50.0%)   | 3 (1.6%)          | 0 (0.0%)             |           |     |
| Moderate                                          | 1 (0.4%)    | 0 (0.0%)    | 0 (0.0%)    | 0 (0.0%)          | 0 (0.0%)         | 0 (0.0%)    | 0 (0.0%)          | 1 (5.6%)             |           |     |
| <b>Pleural effusion:</b>                          |             |             |             |                   |                  |             |                   |                      |           | 269 |
| Nil                                               | 242 (90.0%) | 41 (93.2%)  | 5 (83.3%)   | 7 (100.0%)        | 4 (80.0%)        | 3 (75.0%)   | 167 (90.3%)       | 15 (83.3%)           |           |     |
| Trace                                             | 11 (4.1%)   | 1 (2.3%)    | 1 (16.7%)   | 0 (0.0%)          | 0 (0.0%)         | 0 (0.0%)    | 6 (3.2%)          | 3 (16.7%)            |           |     |
| Mild                                              | 7 (2.6%)    | 2 (4.5%)    | 0 (0.0%)    | 0 (0.0%)          | 1 (20.0%)        | 0 (0.0%)    | 4 (2.2%)          | 0 (0.0%)             |           |     |
| Moderate                                          | 7 (2.6%)    | 0 (0.0%)    | 0 (0.0%)    | 0 (0.0%)          | 0 (0.0%)         | 1 (25.0%)   | 6 (3.2%)          | 0 (0.0%)             |           |     |
| Severe                                            | 2 (0.7%)    | 0 (0.0%)    | 0 (0.0%)    | 0 (0.0%)          | 0 (0.0%)         | 0 (0.0%)    | 2 (1.1%)          | 0 (0.0%)             |           |     |
| <b>Air trapping:</b>                              |             |             |             |                   |                  |             |                   |                      |           | 269 |
| Nil                                               | 216 (80.3%) | 40 (90.9%)  | 5 (83.3%)   | 7 (100.0%)        | 4 (80.0%)        | 1 (25.0%)   | 146 (78.9%)       | 13 (72.2%)           |           |     |
| Trace                                             | 26 (9.7%)   | 3 (6.8%)    | 1 (16.7%)   | 0 (0.0%)          | 0 (0.0%)         | 1 (25.0%)   | 17 (9.2%)         | 4 (22.2%)            |           |     |
| Mild                                              | 18 (6.7%)   | 0 (0.0%)    | 0 (0.0%)    | 0 (0.0%)          | 0 (0.0%)         | 2 (50.0%)   | 15 (8.1%)         | 1 (5.6%)             |           |     |
| Moderate                                          | 4 (1.5%)    | 0 (0.0%)    | 0 (0.0%)    | 0 (0.0%)          | 0 (0.0%)         | 0 (0.0%)    | 4 (2.2%)          | 0 (0.0%)             |           |     |
| Severe                                            | 5 (1.9%)    | 1 (2.3%)    | 0 (0.0%)    | 0 (0.0%)          | 1 (20.0%)        | 0 (0.0%)    | 3 (1.6%)          | 0 (0.0%)             |           |     |
| <b>Subpleural scarring:</b>                       |             |             |             |                   |                  |             |                   |                      | 0.736     | 243 |
| Nil                                               | 237 (97.5%) | 39 (97.5%)  | 1 (100.0%)  | 0 (%)             | 5 (100.0%)       | 4 (100.0%)  | 170 (97.1%)       | 18 (100.0%)          |           |     |
| Trace                                             | 2 (0.8%)    | 1 (2.5%)    | 0 (0.0%)    | 0 (%)             | 0 (0.0%)         | 0 (0.0%)    | 1 (0.6%)          | 0 (0.0%)             |           |     |
| Mild                                              | 4 (1.6%)    | 0 (0.0%)    | 0 (0.0%)    | 0 (%)             | 0 (0.0%)         | 0 (0.0%)    | 4 (2.3%)          | 0 (0.0%)             |           |     |

**Table S1. Clinical characteristics of IPAH patients who harbor protein-coding variants in *BMP2R*, *EIF2AK4*, *KDR*, *IDH3G*, and *IDH3G*. BMI - body mass index, WHO FC - World Health Organization functional class, 6MWD - 6-minute walk distance, SpO<sub>2</sub> - arterial oxygen saturation, mRAP - mean right atrial pressure, mPAP - mean pulmonary artery pressure, mPAWP - mean pulmonary artery wedge pressure, CO - cardiac output, PVR - pulmonary vascular resistance, NO - nitric oxide challenge, FEV<sub>1</sub> - forced expiratory volume in 1 second, FVC - forced vital capacity, KCO - transfer factor coefficient for carbon monoxide, COPD - chronic obstructive pulmonary disease, OSA - obstructive sleep apnea, CAD - coronary artery disease, HTN - systemic hypertension, CKD - chronic kidney disease, Hb - haemoglobin, WBC - white blood cells, TSH - thyroid-stimulating hormone. Comorbidities are reported as the number and percentage of cases possessing a disease entity.**

|                                   | <i>BMP2R</i> N=162 | Biallelic <i>EIF2AK4</i> N=14 | <i>KDR</i> PTV N=4 | <i>IDH3G</i> N=5 | No mutation N=818 | p.overall | N    |
|-----------------------------------|--------------------|-------------------------------|--------------------|------------------|-------------------|-----------|------|
| Age [years]                       | 39 [32;51]         | 31 [23;42]                    | 64 [62;68]         | 34 [27;51]       | 52 [38;66]        | <0.001    | 994  |
| Sex: female                       | 107 (66%)          | 7 (50%)                       | 2 (50%)            | 5 (100%)         | 571 (70%)         | 0.146     | 998  |
| BMI [kg/m <sup>2</sup> ]          | 27 [23;32]         | 24 [20;27]                    | 26 [26;30]         | 24 [21;24]       | 27 [23;32]        | 0.017     | 909  |
| WHO FC                            |                    |                               |                    |                  |                   | 0.067     | 965  |
| I                                 | 2 (1.2%)           | 0 (0.0%)                      | 0 (0.0%)           | 0 (0.0%)         | 16 (2.0%)         |           |      |
| II                                | 32 (19.9%)         | 2 (14.3%)                     | 1 (25.0%)          | 1 (20.0%)        | 153 (19.6%)       |           |      |
| III                               | 96 (59.6%)         | 9 (64.3%)                     | 3 (75.0%)          | 1 (20.0%)        | 522 (66.8%)       |           |      |
| IV                                | 31 (19.3%)         | 3 (21.4%)                     | 0 (0.0%)           | 3 (60.0%)        | 90 (11.5%)        |           |      |
| 6MWD [m]                          | 355 [288;421]      | 302 [210;466]                 | 301 [240;362]      | 414 [382;414]    | 335 [218;412]     | 0.314     | 625  |
| SpO <sub>2</sub> pre [%]          | 96 [94;98]         | 92 [90;96]                    | 97 [96;97]         | 96 [96;98]       | 95 [93;97]        | 0.003     | 801  |
| SpO <sub>2</sub> post [%]         | 94 [89;97]         | 83 [76;86]                    | 86 [86;88]         | 96 [96;98]       | 90 [84;95]        | <0.001    | 740  |
| mRAP [mmHg]                       | 10 [6;14]          | 8 [6;10]                      | 6 [4;8]            | 12 [8;14]        | 8 [5;12]          | 0.019     | 882  |
| mPAP [mmHg]                       | 57 [52;68]         | 52 [44;59]                    | 50 [43;58]         | 58 [50;62]       | 52 [42;61]        | <0.001    | 946  |
| mPAWP [mmHg]                      | 10 [7;12]          | 11 [8;12]                     | 10 [8;13]          | 10 [8;12]        | 9 [7;12]          | 0.902     | 838  |
| CO [L/min]                        | 3.3 [2.7;4.0]      | 4.5 [3.0;4.9]                 | 4.9 [4.3;5.4]      | 3.3 [3.0;3.5]    | 4.0 [3.2;5.1]     | <0.001    | 903  |
| PVR [WU]                          | 14.4 [10.8;20.3]   | 9.56 [8.16;11.1]              | 7.93 [6.23;10.9]   | 15.4 [12.9;17.5] | 10.3 [7.14;13.9]  | <0.001    | 806  |
| Acute NO challenge: vasoresponder | 1 (1.28%)          | 0 (0.00%)                     | 1 (25.0%)          | 0 (0.00%)        | 52 (17.3%)        | <0.001    | 392  |
| FEV <sub>1</sub> [% pred.]        | 91 [79;100]        | 93 [84;100]                   | 86 [79;96]         | 95 [87;99]       | 84 [71;95]        | <0.001    | 764  |
| FVC [% pred.]                     | 100 (17)           | 101 (16)                      | 93 (17)            | 93 (12)          | 93 (20)           | 0.003     | 748  |
| FEV <sub>1</sub> /FVC ratio       | 0.77 [0.73;0.82]   | 0.79 [0.69;0.81]              | 0.78 [0.76;0.79]   | 0.82 [0.78;0.84] | 0.75 [0.68;0.81]  | 0.021     | 681  |
| KCO [%pred.]                      | 83 [74;96]         | 33 [30;35]                    | 46 [46;48]         | 73 [71;73]       | 68 [48;83]        | <0.001    | 580  |
| Smoking history: yes              | 53 (40.8%)         | 4 (30.8%)                     | 1 (25.0%)          | 1 (20.0%)        | 330 (53.4%)       | 0.012     | 770  |
| COPD                              | 6 (3.70%)          | 0 (0.00%)                     | 0 (0.00%)          | 0 (0.00%)        | 49 (5.99%)        | 0.678     | 1003 |
| Asthma                            | 20 (12.3%)         | 4 (28.6%)                     | 0 (0.00%)          | 0 (0.00%)        | 47 (5.75%)        | 0.003     | 1003 |
| OSA                               | 0 (0.00%)          | 0 (0.00%)                     | 0 (0.00%)          | 0 (0.00%)        | 55 (6.72%)        | 0.001     | 1003 |
| Pulmonary fibrosis                | 0 (0.00%)          | 0 (0.00%)                     | 2 (50.0%)          | 0 (0.00%)        | 13 (1.59%)        | 0.002     | 1003 |
| CAD                               | 3 (1.85%)          | 1 (7.14%)                     | 1 (25.0%)          | 0 (0.00%)        | 32 (3.91%)        | 0.115     | 1003 |
| HTN                               | 27 (16.7%)         | 0 (0.00%)                     | 2 (50.0%)          | 0 (0.00%)        | 210 (25.7%)       | 0.005     | 1003 |
| CKD                               | 4 (2.47%)          | 0 (0.00%)                     | 0 (0.00%)          | 0 (0.00%)        | 41 (5.01%)        | 0.568     | 1003 |
| Hypothyroidism                    | 14 (8.64%)         | 1 (7.14%)                     | 1 (25.0%)          | 0 (0.00%)        | 108 (13.2%)       | 0.338     | 1003 |
| Hb [g/l]                          | 162 [152;173]      | 165 [154;179]                 | 148 [135;152]      | 151 [148;164]    | 149 [135;161]     | <0.001    | 760  |
| WBC [x10e9/l]                     | 8.74 [7.30;10.8]   | 7.43 [6.50;10.8]              | 8.80 [8.23;9.55]   | 7.30 [6.60;7.40] | 8.10 [6.70;9.70]  | 0.03      | 753  |
| Platelets [x10e9/l]               | 210 [174;251]      | 219 [206;234]                 | 216 [188;251]      | 208 [160;211]    | 228 [181;276]     | 0.272     | 749  |
| Creatinine [umol/l]               | 93.0 [77.2;102]    | 79.0 [72.2;95.0]              | 67.0 [66.5;96.5]   | 79.0 [73.0;85.0] | 84.0 [70.0;103]   | 0.25      | 745  |
| TSH [mU/l]                        | 2.37 [1.67;3.65]   | 2.08 [1.09;3.69]              | 1.76 [1.72;1.84]   | 1.44 [1.43;2.02] | 2.00 [1.10;3.16]  | 0.038     | 588  |

bioRxiv preprint doi: <https://doi.org/10.1101/2019.12.11.871210>; this version posted December 22, 2019. The copyright holder for this preprint (which was not certified by peer review) is the author/funder, who has granted bioRxiv a license to display the preprint in perpetuity. It is made available under aCC-BY-NC-ND 4.0 International license.

| Abbreviation               | Explanation                                                                                                                           |
|----------------------------|---------------------------------------------------------------------------------------------------------------------------------------|
| WGS ID                     | whole-genome sequencing identifier                                                                                                    |
| WES ID                     | whole-exome sequencing identifier                                                                                                     |
| HGVSc                      | the HGVS coding sequence name                                                                                                         |
| HGVSp                      | the HGVS protein sequence name                                                                                                        |
| gnomAD                     | Genome Aggregation Database                                                                                                           |
| CADD_PHRED_v1.3            | Combined Annotation Dependent Depletion                                                                                               |
| CADD_PHRED_v1.4            | Combined Annotation Dependent Depletion                                                                                               |
| SIFT                       | Sorting Intolerant From Tolerant prediction score                                                                                     |
| PolyPhen                   | Polymorphism Phenotyping v2 score                                                                                                     |
| GerpN                      | conservation score of each nucleotide in multi-species alignment                                                                      |
| <i>KDR</i>                 | Kinase Insert Domain Receptor                                                                                                         |
| <i>IDH3G</i>               | Isocitrate Dehydrogenase (NAD(+)) 3 Non-Catalytic Subunit Gamma                                                                       |
| <i>BMP2</i>                | Bone Morphogenetic Protein Type 2 Receptor                                                                                            |
| <i>EIF2AK4</i>             | Eukaryotic Translation Initiation Factor 2 Alpha Kinase 4                                                                             |
| <i>ATP13A3</i>             | ATPase 13A3                                                                                                                           |
| <i>SOX17</i>               | SRY-box 17                                                                                                                            |
| <i>AQP1</i>                | Aquaporin 1                                                                                                                           |
| <i>ENG</i>                 | Endoglin                                                                                                                              |
| <i>ACVRL1</i>              | Activin-Like Kinase 1                                                                                                                 |
| <i>CAV1</i>                | Caveolin-1                                                                                                                            |
| <i>SMAD9</i>               | SMAD family member 9                                                                                                                  |
| <i>SMAD1</i>               | SMAD family member 1                                                                                                                  |
| <i>GDF2</i>                | Growth Differentiation Factor 2                                                                                                       |
| <i>TBX4</i>                | T-Box Transcription Factor 4                                                                                                          |
| <i>KCNK3</i>               | Potassium Two Pore Domain Channel Subfamily K Member 3                                                                                |
| <i>SMAD4</i>               | SMAD family member 4                                                                                                                  |
| shared                     | indicates if a variant appears in other cohort individuals, i.e. PAH(2), BPD(1) means 2 PAH cases and 1 BPD case harbour this variant |
| REVEL                      | Rare Exome Variant Ensemble Learner                                                                                                   |
| NIHRBR-RD                  | The National Institute for Health Research BioResource - Rare Diseases study (NIHRBR-RD),                                             |
| SvO <sub>2</sub> [%]       | Mixed venous oxygen saturation                                                                                                        |
| WHO FC                     | World Health Organisation functional class                                                                                            |
| 6MWD [m]                   | six minute walking distance                                                                                                           |
| SpO <sub>2</sub> [%]       | peripheral capillary oxygen saturation                                                                                                |
| FEV <sub>1</sub> [% pred.] | Forced Expiratory Volume in one second                                                                                                |
| FVC [% pred.]              | Forced Vital Capacity                                                                                                                 |
| TLC [% pred.]              | Total Lung Capacity                                                                                                                   |
| KCO [% pred.]              | Transfer Coefficient of Carbon Monoxide                                                                                               |
| mRAP [mmHg]                | mean Right Atrial Pressure                                                                                                            |
| mPAP [mmHg]                | mean Pulmonary Artery Pressure                                                                                                        |
| PAWP [mmHg]                | Pulmonary Artery Wedge Pressure                                                                                                       |
| CO [L/min]                 | cardiac output                                                                                                                        |
| CI [L/min/m <sup>2</sup> ] | cardiac index                                                                                                                         |
| PVR [WU]                   | pulmonary vascular resistance                                                                                                         |
| ILD                        | interstitial lung disease                                                                                                             |
| COPD                       | chronic obstructive pulmonary disease                                                                                                 |
| OSA                        | obstructive sleep apnoea                                                                                                              |

|                          |                                                                       |
|--------------------------|-----------------------------------------------------------------------|
| DM                       | diabetes mellitus                                                     |
| HTN                      | systemic hypertension                                                 |
| CKD                      | chronic kidney disease                                                |
| CAD                      | coronary artery disease                                               |
| CVA                      | Cerebro-Vascular Accident                                             |
| PAD                      | Peripheral Artery Disease                                             |
| GGO                      | Ground Glass Opacities                                                |
| BA                       | Bronchial Artery                                                      |
| Hb [g/l]                 | Haemoglobin                                                           |
| NTproBNP [ng/l]          | N-terminal pro B-Type Natriuretic Peptide                             |
| BNP [ng/l]               | B-Type Natriuretic Peptide                                            |
| CRP [mg/l]               | C reactive protein                                                    |
| WBC [x10e9/l]            | White Blood Cell Count                                                |
| TSH [mU/l]               | Thyroid Stimulating Hormon                                            |
| PH                       | Pulmonary Hypertension                                                |
| PAH                      | Pulmonary Arterial Hypertension                                       |
| I/HPAH                   | Idiopathic/Hereditary Pulmonary Arterial Hypertension                 |
| PVOD/PCH                 | Pulmonary veno-occlusive disease/ Pulmonary capillary hemangiomatosis |
| APAH                     | Associated Pulmonary Arterial Hypertension                            |
| APAH: CHD-PAH            | PAH associated with congenital heart disease                          |
| APAH: CTD-PAH            | PAH associated with connective tissue disease                         |
| APAH: PPH-PAH/ should be | PAH associated with portopulmonary hypertension                       |
| APAH: HIV-PAH            | PAH associated with HIV                                               |
| PH-LHD                   | pulmonary hypertension associated with left heart disease             |
| PH-LD                    | pulmonary hypertension associated with lung disease                   |
| CTEPH                    | Chronic thromboembolic pulmonary hypertension                         |
| PH-multifactorial        | Multifactorial pulmonary hypertension                                 |
| GEL                      | Genomics England Ltd                                                  |
| BPD                      | Bleeding, Thrombotic and Platelet Disorders                           |
| PID                      | Primary Immune Disorders                                              |
| CNTRL                    | Processed Controls                                                    |
| IRD                      | Inherited Retinal Disorders                                           |
| NDD                      | Neurological and Developmental Disorders                              |
| EDS                      | Ehlers Danlos Syndrome                                                |
| HCM                      | Hypertrophic Cardiomyopathy                                           |
| PMG                      | Primary Membranoproliferative Glomerulonephritis                      |
| SRNS                     | Steroid Resistant Nephrotic Syndrome                                  |
| CSVD                     | Cerebral Small Vessel Disease                                         |
| NPD                      | Neuropathic Pain Disorder                                             |
| ICP                      | Intrahepatic Cholestasis of Pregnancy                                 |
| LHON                     | Leber Hereditary Optic Neuropathy                                     |
| MPMT                     | Multiple Primary Tumours                                              |
| SMD                      | Stem Cell & Myeloid Disorders                                         |
| PAH                      | Pulmonary arterial hypertension                                       |
| UKBio                    | UK BioBank                                                            |
| FHx                      | family history                                                        |
| CTPA                     | Computerised Tomography Pulmonary Angiogram                           |
| HRCT                     | High-Resolution Computerised Tomography                               |
| BMI                      | Body Mass Index                                                       |

|         |                                                                                         |
|---------|-----------------------------------------------------------------------------------------|
| NO      | nitric oxide                                                                            |
| BeviMed | Bayesian Evaluation of Variant Involvement in Mendelian Disease                         |
| PTV     | Protein Truncating Variants                                                             |
| PP      | Posterior Probability                                                                   |
| VEGFR2  | vascular endothelial growth factor receptor 2                                           |
| eCRF    | electronic Clinical Case Report Form                                                    |
| GRCh37  | Genome Reference Consortium human genome build 37                                       |
| PMAF    | The probability that the minor allele count is at least the observed minor allele count |
| ICC     | Intraclass Correlation Coefficient                                                      |
| CT      | Computerised Tomography                                                                 |
| RHC     | Right Heart Catheterisation                                                             |
| ASD     | Atrial Septal Defect                                                                    |
| SU5416  | sugen                                                                                   |
| PDH     | Pyruvate dehydrogenase                                                                  |
| IDH     | isocitrate dehydrogenase                                                                |
| BHF     | British Heart Foundation                                                                |
| SNV     | Single Nucleotide Variants                                                              |
| MAF     | Minor Allele Frequency                                                                  |
